# Supplementary material
Source: ML conference proceedings conference paper supplement (https://openreview.net/forum?id=VZ63F7l3aD)
Supplement: supplementary_material [file attachment]

---

# Online Heavy-tailed Change-point detection (Supplementary Materials)

---

Abishek Sankararaman\*<sup>1</sup>

Balakrishnan (Murali) Narayanaswamy<sup>1</sup>

<sup>1</sup>AWS AI Labs

## A CHANGE-POINT LOCALIZATION

---

### Algorithm 1 Online Clipped-SGD Change Point Detection and Localization

---

```

1: Input:  $(\eta_t)_{t \geq 1}$ ,  $\lambda > 0$ ,  $\theta_0 \in \Theta$ ,  $\delta \in (0, 1)$  FPR guarantee
2:  $r \leftarrow 1$ 
3:  $\hat{\theta}_{t,t-1} \leftarrow \theta_0$ , for all  $t \geq 1$ .
4: Set  $\tau_c^{(0)} \leftarrow 0$ 
5: Set Num-change-points  $\leftarrow 0$ 
6: for each time  $t = 1, 2, \dots$ , do
7:   Receive sample  $X_t$ 
8:    $\hat{\theta}_{s,t} \leftarrow \prod_{\theta} (\hat{\theta}_{s,t-1} - \eta_{t-s} \text{clip}(X_t - \hat{\theta}_{s,t-1}, \lambda))$ , for every  $r \leq s \leq t$ .
9:   if  $\exists s \in (r, t)$  such that  $\|\hat{\theta}_{r:s} - \hat{\theta}_{s+1:t}\|_2^2 > \mathcal{B}\left(s-r, \frac{\delta}{2(t-r)(t-r+1)}\right) + \mathcal{B}\left(t-s-1, \frac{\delta}{2(t-r)(t-r+1)}\right)$   $\{B(\cdot, \cdot)$  is defined in Equation (5) then
10:     Set Restart $_t \leftarrow 1$  {Change point detected}
11:     Set Num-change-points  $\leftarrow$  Num-change-points  $+1$  {Increment number of change-points detected}
12:     Output time interval  $[\inf\{s \in (r, t)$  s.t.  $\mathfrak{B}(r, s, t, \delta) = 1\}, \sup\{s \in (r, t)$  s.t.  $\mathfrak{B}(r, s, t, \delta) = 1\}]$  as the location of the change-point  $\{\mathfrak{B}(\cdot)$  defined in Equation (8) end if
13:    $r \leftarrow t + 1$ 
14: else
15:   Set Restart $_t \leftarrow 0$ 
16: end if
17: end for

```

---

## B PROOF FOR ROBUST ESTIMATION IN THEOREM 3.1

We follow the same proof architecture as that of Proof of [Tsai et al., 2022].

Fix a time  $t \in \mathbb{N}$ . We define a sequence of random variable  $(\psi_t)_{t \geq 1}$  as follows.

$$\psi_t := \text{clip}((X_t - \hat{\theta}_{t-1}), \lambda) - (\theta^* - \hat{\theta}_{t-1}),$$

Consider any time  $t$ . We have

$$\|\theta_t - \theta^*\|_2^2 = \left\| \prod_{\Theta} (\hat{\theta}_{t-1} - \eta_t \text{clip}(X_t - \hat{\theta}_{t-1}, \lambda)) - \theta^* \right\|_2^2, \quad (1)$$

$$\stackrel{(a)}{\leq} \|\hat{\theta}_{t-1} - \eta_t \text{clip}(X_t - \hat{\theta}_{t-1}, \lambda) - \theta^*\|_2^2, \quad (2)$$

$$\begin{aligned}
&= \|\widehat{\theta}_{t-1} - \eta_t(\psi_t + (\theta^* - \widehat{\theta}_{t-1})) - \theta^*\|_2^2, \\
&= \|\widehat{\theta}_{t-1} - \theta^*\|_2^2 + \eta_t^2 \|\psi_t + (\theta^* - \widehat{\theta}_{t-1})\|_2^2 - 2\eta_t \langle \widehat{\theta}_{t-1} - \theta^*, \psi_t + (\theta^* - \widehat{\theta}_{t-1}) \rangle, \\
&\stackrel{(b)}{\leq} \|\widehat{\theta}_{t-1} - \theta^*\|_2^2 + 2\eta_t^2 \|\psi_t\|_2^2 + 2\eta_t^2 \|(\theta^* - \widehat{\theta}_{t-1})\|_2^2 - 2\eta_t \langle \widehat{\theta}_{t-1} - \theta^*, \psi_t + (\theta^* - \widehat{\theta}_{t-1}) \rangle, \tag{3}
\end{aligned}$$

Step (a) follows since  $\Theta$  is a convex set,  $\|\mathcal{P}_\Theta(\widehat{\theta}_t) - \theta^*\| \leq \|\widehat{\theta}_t - \theta^*\|$ , since  $\theta^* \in \Theta$ . In step (b), we use the fact that  $\|a + b\|_2^2 \leq 2\|a\|_2^2 + 2\|b\|_2^2$ , for all  $a, b \in \mathbb{R}^d$ . Substituting Equation (35) into (3), we get that

$$\begin{aligned}
\|\theta^* - \theta_t\|_2^2 &\leq \|\widehat{\theta}_{t-1} - \theta^*\|_2^2 + 2\eta_t^2 \|\psi_t\|_2^2 - 2\eta_t \langle \widehat{\theta}_{t-1} - \theta^*, \psi_t \rangle \\
&\quad + 2\eta_t^2 \left( (M + m) \langle (\theta^* - \widehat{\theta}_{t-1}), \widehat{\theta}_{t-1} - \theta_t^* \rangle - mM \|\widehat{\theta}_{t-1} - \theta^*\|_2^2 \right) - 2\eta_t \langle (\theta^* - \widehat{\theta}_{t-1}), \widehat{\theta}_{t-1} - \theta_t^* \rangle.
\end{aligned}$$

Re-arranging the equation above yields

$$\begin{aligned}
\|\theta^* - \theta_t\|_2^2 &\leq (1 - 2\eta_t^2 mM) \|\widehat{\theta}_{t-1} - \theta^*\|_2^2 + 2\eta_t^2 \|\psi_t\|_2^2 - 2\eta_t \langle \widehat{\theta}_{t-1} - \theta^*, \psi_t \rangle \\
&\quad - 2\eta_t (1 - \eta_t ((M + m))) \langle (\theta^* - \widehat{\theta}_{t-1}), \widehat{\theta}_{t-1} - \theta_t^* \rangle.
\end{aligned}$$

Further substituting Equation (34) into the display above yields that

$$\begin{aligned}
\|\theta^* - \widehat{\theta}_t\|_2^2 &\leq (1 - 2\eta_t m + 2\eta_t^2 m^2) \|\widehat{\theta}_{t-1} - \theta^*\|_2^2 + 2\eta_t^2 \|\psi_t\|_2^2 - 2\eta_t \langle \widehat{\theta}_{t-1} - \theta^*, \psi_t \rangle, \\
&\leq (1 - \eta_t m) \|\widehat{\theta}_{t-1} - \theta^*\|_2^2 + 2\eta_t^2 \|\psi_t\|_2^2 - 2\eta_t \langle \widehat{\theta}_{t-1} - \theta^*, \psi_t \rangle,
\end{aligned}$$

where the inequality comes from the fact that if  $\eta_t m < 1 \implies 2\eta_t m - 2\eta_t^2 m^2 > \eta_t m$ .

$$\|\theta^* - \widehat{\theta}_t\|_2^2 \leq (1 - \eta_t m) \|\widehat{\theta}_{t-1} - \theta^*\|_2^2 + 2\eta_t^2 \|\psi_t\|_2^2 - 2\eta_t \langle \widehat{\theta}_{t-1} - \theta^*, \psi_t \rangle. \tag{4}$$

Unrolling the recursion yields,

$$\begin{aligned}
\|\theta^* - \widehat{\theta}_t\|_2^2 &\leq \prod_{u=1}^t (1 - \eta_u m) \|\theta_1 - \theta^*\|_2^2 + 2\eta_t^2 \sum_{s=1}^{t-1} \prod_{u=1}^s (1 - \eta_{t-u+1} m) \|\psi_{t-s+1}\|_2^2 \\
&\quad - 2\eta_t \sum_{s=1}^{t-1} \prod_{u=1}^s (1 - \eta_{t-u+1} m) \langle \theta_{t-s} - \theta^*, \psi_{t-s+1} \rangle.
\end{aligned}$$

Using the fact that  $\prod_{u=1}^s (1 - \eta_{t-u+1} m) = \frac{(t-s+\gamma-3)(t-s+\gamma-2)}{(t+\gamma)(t+\gamma-1)}$ , we get that

$$\|\theta^* - \widehat{\theta}_t\|_2^2 \leq \frac{(\gamma-2)(\gamma-1) \|\theta_1 - \theta^*\|_2^2}{(t+\gamma)(t+\gamma-1)} \tag{5}$$

$$-2\eta_t \sum_{s=1}^{t-1} \frac{(t-s+\gamma-3)(t-s+\gamma-2) \langle \theta_{t-s} - \theta^*, \psi_{t-s+1} \rangle}{(t+\gamma)(t+\gamma-1)}. \tag{6}$$

Denote by  $\psi_t := \psi_t^{(b)} + \psi_t^{(v)}$ , where  $\psi_t^{(b)} := \mathbb{E}_{Z_t}[\psi_t | \mathcal{F}_{t-1}]$  and  $\psi_t^{(v)} := \psi_t - \psi_t^{(b)}$ . Using this in the display above and using that fact that  $\|a + b\|_2^2 \leq 2\|a\|_2^2 + 2\|b\|_2^2$ , we get

$$\begin{aligned}
\|\theta_t^* - \theta\|_2^2 &\leq \frac{(\gamma-1)(\gamma-2) \|\theta_1 - \theta^*\|_2^2}{(t+\gamma)(t+\gamma-1)} + 4\eta_t^2 \sum_{s=1}^{t-1} \frac{(t-s+\gamma-3)(t-s+\gamma-2) \|\psi_{t-s+1}\|_2^2}{(t+\gamma)(t+\gamma-1)} \\
&\quad - 2\eta_t \sum_{s=1}^{t-1} \frac{(t-s+\gamma-3)(t-s+\gamma-2) \langle \theta_{t-s} - \theta^*, \psi_{t-s+1}^{(b)} \rangle}{(t+\gamma)(t+\gamma-1)} \\
&\quad - 2\eta_t \sum_{s=1}^{t-1} \frac{(t-s+\gamma-3)(t-s+\gamma-2) \langle \theta_{t-s} - \theta^*, \psi_{t-s+1}^{(v)} \rangle}{(t+\gamma)(t+\gamma-1)}.
\end{aligned}$$

Further simplifying by adding and subtracting  $\mathbb{E}_{Z_t}[\|\psi_t^{(v)}\|_2^2|\mathcal{F}_{t-1}]$  to be above display, we get

$$\|\theta^* - \widehat{\theta}_t\|_2^2 \leq \frac{(\gamma-1)(\gamma-2)\|\theta_1 - \theta^*\|_2^2}{(t+\gamma)(t+\gamma-1)} + 4\eta_t^2 \sum_{s=1}^{t-1} \frac{(t-s+\gamma-3)(t-s+\gamma-2)\|\psi_{t-s+1}^{(b)}\|_2^2}{(t+\gamma)(t+\gamma-1)} \quad (7)$$

$$+ 4\eta_t^2 \sum_{s=1}^{t-1} \frac{(t-s+\gamma-3)(t-s+\gamma-2)\mathbb{E}_{Z_{t-s+1}}[\|\psi_{t-s+1}^{(v)}\|_2^2|\mathcal{F}_{t-s}]}{(t+\gamma)(t+\gamma-1)} \quad (8)$$

$$+ 4\eta_t^2 \sum_{s=1}^{t-1} \frac{(t-s+\gamma-3)(t-s+\gamma-2)(\|\psi_{t-s+1}^{(v)}\|_2^2 - \mathbb{E}_{Z_{t-s+1}}[\|\psi_{t-s+1}^{(v)}\|_2^2|\mathcal{F}_{t-s}])}{(t+\gamma)(t+\gamma-1)} \quad (8)$$

$$- 2\eta_t \sum_{s=1}^{t-1} \frac{(t-s+\gamma-3)(t-s+\gamma-2)\langle \theta_{t-s} - \theta^*, \psi_{t-s+1}^{(b)} \rangle}{(t+\gamma)(t+\gamma-1)} \quad (9)$$

$$- 2\eta \sum_{s=1}^{t-1} \frac{(t-s+\gamma-3)(t-s+\gamma-2)\langle \theta_{t-s} - \theta^*, \psi_{t-s+1}^{(v)} \rangle}{(t+\gamma)(t+\gamma-1)}. \quad (9)$$

**Lemma B.1** (Lemma F.5 [Gorbunov et al., 2020]). *If  $\lambda \geq 2G$ , the following inequalities hold almost-surely for all times  $t$ .*

$$\|\psi_t^{(v)}\| \leq 2\lambda \mathbf{1}_{\sigma > 0} \quad (10)$$

$$\|\psi_t^{(b)}\|_2 \leq \frac{4\sigma^2}{\lambda} \quad (11)$$

$$\mathbb{E}_{Z_t}[\|\psi_t^{(v)}\|_2^2|\mathcal{F}_{t-1}] \leq 10\sigma^2 \quad (12)$$

Simplifying Equation (9) using bounds in Lemma B.1, along with the fact that for all  $1 \leq s \leq t$  and  $\gamma \geq 1$ ,  $\frac{(t-s+\gamma-3)(t-s+\gamma-2)}{(t+\gamma)(t+\gamma-1)} \leq \frac{t-s+\gamma}{t+\gamma}$  we get

$$\|\theta^* - \widehat{\theta}_t\|_2^2 \leq \frac{(\gamma-1)(\gamma-2)\|\theta_1 - \theta^*\|_2^2}{(t+\gamma)(t+\gamma-1)} + \frac{16\eta_t^2\sigma^2}{\lambda} \sum_{s=1}^{t-1} \frac{t-s+\gamma}{t+\gamma} + 4\eta_t^2\sigma^2 \sum_{s=1}^{t-1} \frac{t-s+\gamma}{t+\gamma} \quad (13)$$

$$+ 4\eta_t^2 \sum_{s=1}^{t-1} \frac{(t-s+\gamma)(\|\psi_{t-s+1}^{(v)}\|_2^2 - \mathbb{E}_{Z_{t-s+1}}[\|\psi_{t-s+1}^{(v)}\|_2^2|\mathcal{F}_{t-s+1}])}{t+\gamma}$$

$$+ 2\eta_t \sum_{s=1}^{t-1} \frac{(t-s+\gamma)\|\theta_{t-s} - \theta^*\| \|\psi_{t-s+1}^{(b)}\|}{t+\gamma} + -2\eta_t \sum_{s=1}^{t-1} \frac{(t-s+\gamma)\langle \theta_{t-s} - \theta^*, \psi_{t-s+1}^{(v)} \rangle}{t+\gamma}.$$

Further applying the bound that  $\|\psi_t^{(b)}\| \leq \frac{4\sigma^2}{\lambda}$

$$\|\theta^* - \widehat{\theta}_t\|_2^2 \leq \frac{(\gamma-1)(\gamma-2)\|\theta_1 - \theta^*\|_2^2}{(t+\gamma)(t+\gamma-1)} + \underbrace{\left( \frac{16\eta_t^2\sigma^2}{\lambda} + 4\eta_t^2\sigma^2 \right) \sum_{s=1}^{t-1} \frac{t-s+1}{t+\gamma}}_{\text{Term 1}} \quad (14)$$

$$+ \underbrace{4\eta_t^2 \sum_{s=1}^{t-1} \frac{(t-s+\gamma)(\|\psi_{t-s+1}^{(v)}\|_2^2 - \mathbb{E}_{Z_{t-s+1}}[\|\psi_{t-s+1}^{(v)}\|_2^2|\mathcal{F}_{t-s+1}])}{t+\gamma}}_{\text{Term 2}}$$

$$+ \underbrace{\frac{8\sigma^2\eta_t}{\lambda} \sum_{s=1}^{t-1} \frac{(t-s+\gamma)\|\theta_{t-s} - \theta^*\|}{t+\gamma}}_{\text{Term 3}} - \underbrace{2\eta_t \sum_{s=1}^{t-1} \frac{(t-s+\gamma)\langle \theta_{t-s} - \theta^*, \psi_{t-s+1}^{(v)} \rangle}{t+\gamma}}_{\text{Term 4}}.$$

## B.1 PROBABILISTIC ANALYSIS

### Definitions

For every  $t \geq 1$ , denote by the constant

$$C_t = \max \left( \frac{1024\sigma^4}{G^2 m^2 \lambda^2}, \frac{8\lambda \sqrt{\ln \left( \frac{2t^3}{\delta} \right)}}{\gamma^2 G} \right). \quad (15)$$

Denote by the deterministic constant  $\xi_u^{(t)}$  for  $u = 1, \dots, t$  as

$$\left( \xi_u^{(t)} \right)^2 := C_t \left[ \left( \frac{16\sigma^2}{\lambda} + 4\sigma^2 \right) \frac{1}{2m^2(u+1)} + \frac{96\lambda^2 \ln \left( \frac{2t^3}{\delta} \right) \sigma(\sigma+1)}{m(u+\gamma)\sqrt{u+1}} \right]. \quad (16)$$

From the definition, the following in-equalities hold.

**Proposition B.2.** For all times  $u \in \{1, \dots, t\}$ ,

$$\sum_{s=1}^{u-1} (u-s+\gamma) \xi_s^{(t)} \leq 2(u+\gamma)\sqrt{u+1} \xi_u^{(t)}, \quad (17)$$

$$\sum_{s=1}^{u-1} (\xi_s^{(t)})^2 \leq 2(u+1) \ln(u+1) (\xi_u^{(t)})^2 \quad (18)$$

*Proof.* This follows from the following fact.

**Proposition B.3.** For all  $u \in \mathbb{N}$  and  $\gamma \geq 0$ , we have

$$\sum_{s=1}^{u-1} \frac{u-s+\gamma}{\sqrt{u+1}} \leq 2(u+\gamma)\sqrt{u+1}.$$

□

For each time  $u \in \{1, \dots, t\}$ , denote by the random variable  $\nu_u^{(t)}$  by

$$\nu_u^{(t)} := \begin{cases} \theta_u - \theta^* & \text{if } \|\theta_u - \theta^*\|^2 \leq (\xi_u^{(t)})^2 + \frac{C_t \gamma^2 G^2}{(u+1)} \\ 0 & \text{if otherwise} \end{cases}$$

For every  $u \in \{1, \dots, t\}$ , denote by the event  $\mathcal{E}_{u;1}^{(t)}$  to be the one in which the following inequality holds for all  $u \in \{1, \dots, t\}$ .

$$\mathcal{E}_{u;1}^{(t)} := \left\{ 4\eta_t^2 \sum_{s=1}^{u-1} \frac{(u-s+\gamma) (\|\psi_{u-s+1}^{(v)}\|_2^2 - \mathbb{E}_{Z_{u-s+1}} [\|\psi_{u-s+1}^{(v)}\|_2^2 | \mathcal{F}_{u-s+1}])}{t+\gamma} \leq \frac{96\lambda^2 \ln \left( \frac{2t^2(t+1)}{\delta} \right) \sigma(\sigma+1)}{m(u+\gamma)\sqrt{u+1}} \right\}. \quad (19)$$

and  $\mathcal{E}_{u;2}^{(t)}$  as

$$\mathcal{E}_{u;2}^{(t)} := \left\{ -2\eta_u \sum_{s=1}^{u-1} \frac{(u-s+\gamma) \langle v_{u-s}, \psi_{u-s+1}^{(v)} \rangle}{t+\gamma} \leq \frac{\xi_u^{(t)} \ln \left( \frac{2t^2(t+1)}{\delta} \right)}{10\sqrt{u+1}} + \frac{C_u \gamma^2 G^2}{4(u+1)} \right\} \quad (20)$$

Denote by the event  $\mathcal{E}^{(t)}$  as

$$\mathcal{E}^{(t)} := \bigcap_{u=1}^t \left( \mathcal{E}_{u;1}^{(t)} \cap \mathcal{E}_{u;2}^{(t)} \right). \quad (21)$$

**Lemma B.4.** For all  $t \geq 1$ ,

$$\mathbb{P}[\mathcal{E}^{(t)}] \geq 1 - \frac{\delta}{t(t+1)}.$$

We now prove by induction hypothesis that

**Lemma B.5.** For every  $t$ , under the event  $\mathcal{E}^{(t)}$ , the following holds.

$$\|\widehat{\theta}_u - \theta^*\|_2^2 \leq \frac{C_t \gamma^2 G^2}{(u+1)^2} + (\xi_u^{(t)})^2, \quad (22)$$

for all  $u \in \{1, \dots, t\}$ .

*Proof. Proof of Lemma B.1.* We will prove this lemma by induction on  $u$  by analyzing Equation (14). The base-case of  $u = 1$  holds trivially with probability 1 since  $C_t > 1, \forall t \geq 1$  and  $\gamma > 2$ .

Now, assume that on the event  $\mathcal{E}^{(t)}$ , the induction hypothesis in Equation (22) holds for all times  $1, \dots, u-1$ . We prove this by expanding Equation (14) and bounding each of the terms.

### Term 1

It is easy to verify that

$$\begin{aligned} \left( \frac{16\eta_u^2 \sigma^2}{\lambda} + 4\eta_u^2 \sigma^2 \right) \sum_{s=1}^{u-1} \frac{u-s+\gamma}{u+\gamma} &\leq \left( \frac{16\sigma^2}{\lambda} + 4\sigma^2 \right) \frac{u}{2m^2(u+\gamma)^2}, \\ &\leq \frac{\left( \frac{16\sigma^2}{\lambda} + 4\sigma^2 \right)}{2m^2(u+1)}. \end{aligned}$$

The last inequality follows since  $\gamma^2 > 1$ .

### Term 2

First notice that

$$\begin{aligned} 4\eta_u^2 \sum_{s=1}^{u-1} \frac{(u-s+\gamma)(\|\psi_{u-s+1}^{(v)}\|_2^2 - \mathbb{E}_{Z_{u-s+1}}[\|\psi_{u-s+1}^{(v)}\|_2^2 | \mathcal{F}_{u-s+1}])}{t+\gamma} &\leq \\ &\frac{4\eta_u}{u+\gamma} \sum_{s=1}^{u-1} (\|\psi_{u-s+1}^{(v)}\|_2^2 - \mathbb{E}_{Z_{u-s+1}}[\|\psi_{u-s+1}^{(v)}\|_2^2 | \mathcal{F}_{u-s+1}]) \end{aligned}$$

From the definition of event  $\mathcal{E}^{(t)}$  in Equation (21), we get that

$$\text{Term 2} \leq \frac{96\lambda^2 \ln\left(\frac{2t^2(t+1)}{\delta}\right) \sigma(\sigma+1)}{m(u+\gamma)\sqrt{u+1}}.$$

### Term 3

$$\frac{8\sigma^2 \eta_u}{\lambda} \sum_{s=1}^{u-1} \frac{(u-s+\gamma)\|\theta_{u-s} - \theta^*\|}{u+\gamma} \leq \frac{8\sigma^2}{m\lambda(u+\gamma)^2} \sum_{s=1}^{u-1} \left( (u-s+\gamma)\xi_{u-s}^{(t)} + \sqrt{C_t} \gamma G \frac{(u-s+\gamma)}{(u-s+1)} \right),$$

$$\begin{aligned}
&\stackrel{(18)}{\leq} \frac{16\sigma^2\sqrt{(u+1)}\xi_u^{(t)}}{m(u+\gamma)} + \frac{8\sqrt{C_t}\sigma^2\gamma^2Gu}{m\lambda(u+\gamma)^2}, \\
&\leq \frac{16\sigma^2\sqrt{(u+1)}\xi_u^{(t)}}{m(u+\gamma)} + \frac{8\sqrt{C_t}\sigma^2\gamma^2G}{m\lambda(u+\gamma)}, \\
&\stackrel{(a)}{\leq} \frac{\xi_u^{(t)}}{10\sqrt{u+1}} + \frac{C_t\gamma^2G^2}{4(u+1)}.
\end{aligned}$$

The last inequality follows since  $\gamma \geq \frac{320\sigma^2}{m} + 1 \implies \frac{8\sigma^2(u+1)^{1/2}\log(u+1)}{m(u+\gamma)} \leq \frac{1}{10\sqrt{u+1}}$ , for all  $u \leq t$  and the fact that  $C_t \geq \frac{1024\sigma^4}{G^2m^2\lambda^2}$ .

#### Term 4

The definition of event  $\mathcal{E}^{(t)}$  in Equation (21) gives that Term 4  $\leq \frac{\xi_u^{(t)} \ln\left(\frac{2t^2(t+1)}{\delta}\right)}{10\sqrt{u+1}} + \frac{C_t\gamma^2G^2}{4(u+1)}$

Now, adding in the bounds together into Equation (14),

$$\begin{aligned}
\|\widehat{\theta}_u - \theta^*\|_2^2 &\leq \frac{\gamma^2G^2}{u+1} + \frac{\left(\frac{16\sigma^2}{\lambda} + 4\sigma^2\right)}{2m^2(u+1)} + \frac{\xi_u^{(t)}}{10\sqrt{u+1}} + \frac{1600\lambda^2 \ln\left(\frac{2t^2(t+1)}{\delta}\right) \sigma(\sigma+1)}{m(u+\gamma)\sqrt{u+1}} \\
&\quad + \frac{\xi_u^{(t)} \ln\left(\frac{2t^2(t+1)}{\delta}\right)}{10\sqrt{u+1}} + \frac{C_t\gamma^2G^2}{2(u+1)}.
\end{aligned}$$

Now using the fact that  $\frac{\xi_u^{(t)} \ln\left(\frac{2t^3}{\delta}\right)}{\sqrt{u+1}} \leq (\xi_u^{(t)})^2$ , we get that

$$\|\widehat{\theta}_u - \theta^*\|_2^2 \leq \left(1 + \frac{C_t}{2}\right) \frac{\gamma^2G^2}{u+1} + \frac{\left(\frac{16\sigma^2}{\lambda} + 4\sigma^2\right)}{2m^2(u+1)} + \frac{(\xi_u^{(t)})^2}{5} + \frac{96\lambda^2 \ln\left(\frac{2t^2(t+1)}{\delta}\right) \sigma(\sigma+1)}{m(u+\gamma)\sqrt{u+1}}.$$

Substituting the definition of  $\xi_u^{(t)}$  from Equation (16), we get that

$$\begin{aligned}
\|\widehat{\theta}_u - \theta^*\|_2^2 &\leq \left(1 + \frac{C_t}{2}\right) \left[ \frac{\gamma^2G^2}{u+1} + \frac{\left(\frac{16\sigma^2}{\lambda} + 4\sigma^2\right)}{2m^2(u+1)} + \frac{96\lambda^2 \ln\left(\frac{2t^2(t+1)}{\delta}\right) \sigma(\sigma+1)}{m(u+\gamma)\sqrt{u+1}} \right], \\
&\leq (\xi_u^{(t)})^2 + \frac{C_t\gamma^2G^2}{u+1}.
\end{aligned}$$

The last inequality follows since  $C_t = \max\left(\frac{1024\sigma^4}{G^2m^2\lambda^2}, \frac{8\lambda\sqrt{\ln\left(\frac{2t^3}{\delta}\right)}}{\gamma^2G}\right) \implies C_t \geq 2$ .

□  
□

## B.2 PROOF OF LEMMA B.4

We first reproduce an useful result.

**Lemma B.6** (Freedman's inequality[Victor, 1999]). *Suppose  $Y_1, \dots, Y_T$  is a bounded martingale with respect to a filtration  $(\mathcal{F}_t)_{t=0}^T$  with  $\mathbb{E}[Y_t|\mathcal{F}_{t-1}] = 0$  and  $\mathbb{P}[|Y_t| \leq B] = 1$  for all  $t \in \{1, \dots, T\}$ . Denote by  $V_s := \sum_{n=1}^s \text{Var}(Y_n|\mathcal{F}_{n-1})$  be the sum of conditional variances. Then, for every  $a, v > 0$ ,*

$$\mathbb{P}\left(\exists n \in [1, T] \text{ such that } \sum_{t=1}^n Y_t \geq a \text{ and } V_n \leq v\right) \leq \exp\left(\frac{-a^2}{2(v+Ba)}\right). \quad (23)$$

Re-arranging the above inequality, we see that if

$$a \geq B \ln \left( \frac{2T}{\delta} \right) + \sqrt{\left( B \ln \left( \frac{2T}{\delta} \right) \right)^2 + 2v \ln \left( \frac{2T}{\delta} \right)}, \quad (24)$$

then the RHS of Equation (23) is bounded above by  $\frac{\delta}{2}$ .

*Proof of Lemma B.4. Proof of Equation (19)*

Fix a  $u \in \{1, \dots, t\}$ . For  $s \in \{1, \dots, u-1\}$ , denote by the random variable  $Y_s^{(u)} := \frac{(u-s+\gamma)}{u+\gamma} (\|\psi_{u-s+1}^{(v)}\|_2^2 - \mathbb{E}_{Z_{u-s+1}}[\|\psi_{u-s+1}^{(v)}\|_2^2 | \mathcal{F}_{u-s+1}])$ . Thus,

$$4\eta_u^2 \sum_{s=1}^{u-1} \frac{(u-s+\gamma)(\|\psi_{u-s+1}^{(v)}\|_2^2 - \mathbb{E}_{Z_{u-s+1}}[\|\psi_{u-s+1}^{(v)}\|_2^2 | \mathcal{F}_{u-s+1}])}{u+\gamma} \leq 4\eta_u^2 \sum_{s=1}^{u-1} Y_s^{(u)}.$$

Observe that the sequence  $(Y_s^{(u)})_{s=1}^{u-1}$  is a martingale difference sequence with respect to the filtration  $(\mathcal{G}_s)_{s=1}^{u-1}$ , where  $\mathcal{G}_s := \mathcal{F}_{u-s}$ . Furthermore, observe that with probability 1,  $|Y_s^{(u)}| \leq 4\lambda^2 \mathbf{1}_{\sigma>0} + 4\lambda^2 \mathbf{1}_{\sigma>0} \leq 8\lambda^2 \mathbf{1}_{\sigma>0}$ . We can bound the conditional variance as

$$\begin{aligned} \sum_{s=1}^{u-1} \text{Var}(Y_s^{(u)} | \mathcal{G}_s) &\leq \sum_{s=1}^{u-1} \left( \frac{(u-s+\gamma)}{u+\gamma} \right)^2 \mathbb{E}_{Z_{u-s}} [(\|\psi_{u-s+1}^{(v)}\|_2^2 - \mathbb{E}_{Z_{u-s+1}}[\|\psi_{u-s+1}^{(v)}\|_2^2 | \mathcal{F}_{u-s}])^2 | \mathcal{F}_{u-s}], \\ &\stackrel{10}{\leq} 8\lambda^2 \sum_{s=1}^{u-1} \mathbb{E}_{Z_{u-s}} [\|\psi_{u-s+1}^{(v)}\|_2^2 - \mathbb{E}_{Z_{u-s+1}}[\|\psi_{u-s+1}^{(v)}\|_2^2 | \mathcal{F}_{u-s}] | \mathcal{F}_{u-s}], \\ &\leq 8\lambda^2 \sum_{s=1}^{u-1} 2\mathbb{E}_{Z_{u-s}} [\|\psi_{u-s+1}^{(v)}\|_2^2 | \mathcal{F}_{u-s}], \\ &\stackrel{12}{\leq} 160\lambda^2 \sigma^2 (u-1). \end{aligned}$$

Now, putting  $B := 8\lambda^2$  and  $v = 160\lambda^2 \sigma^2 u$ , we get from Equation (24) that with probability at-least  $1 - \delta/(2t^2(t+1))$ ,

$$\begin{aligned} \sum_{s=1}^{u-1} Y_s^{(u)} &\leq 8\lambda^2 \ln \left( \frac{2t^2(t+1)}{\delta} \right) \mathbf{1}_{\sigma>0} + \sqrt{\left( 8\lambda^2 \ln \left( \frac{2t^2(t+1)}{\delta} \right) \mathbf{1}_{\sigma>0} \right)^2 + 160\lambda^2 \sigma^2 u \ln \left( \frac{2t^2(t+1)}{\delta} \right)}, \\ &\stackrel{(a)}{\leq} 32\lambda^2 \ln \left( \frac{2t^2(t+1)}{\delta} \right) \sigma(\sigma+1) \sqrt{u+1}. \end{aligned}$$

Step (a) follows from the fact that  $\lambda \geq 1$ . Thus, we have with probability at-least  $1 - \frac{\delta}{2t^2(t+1)}$ ,

$$\begin{aligned} 4\eta_u^2 \sum_{s=1}^{u-1} \frac{(u-s+\gamma)(\|\psi_{u-s+1}^{(v)}\|_2^2 - \mathbb{E}_{Z_{u-s+1}}[\|\psi_{u-s+1}^{(v)}\|_2^2 | \mathcal{F}_{u-s+1}])}{u+\gamma} &\leq 96\eta_u^2 \lambda^2 \ln \left( \frac{2t^2(t+1)}{\delta} \right) \sigma(\sigma+1) \sqrt{u+1}, \\ &\leq \frac{96\lambda^2 \ln \left( \frac{2t^2(t+1)}{\delta} \right) \sigma(\sigma+1) \sqrt{u+1}}{m^2(u+\gamma)^2}, \\ &\leq \frac{96\lambda^2 \ln \left( \frac{2t^2(t+1)}{\delta} \right) \sigma(\sigma+1)}{m^2(u+\gamma) \sqrt{u+1}}. \end{aligned}$$

Now taking an union bound over all  $u \in \{1, \dots, t\}$  yields that with probability at-least  $1 - \frac{\delta}{2t(t+1)}$ , for all time  $u \in \{1, \dots, t\}$ ,

$$4\eta_u^2 \sum_{s=1}^{u-1} \frac{(t-s+\gamma)(\|\psi_{u-s+1}^{(v)}\|_2^2 - \mathbb{E}_{Z_{u-s+1}}[\|\psi_{u-s+1}^{(v)}\|_2^2 | \mathcal{F}_{u-s+1}])}{t+\gamma} \leq \frac{96\lambda^2 \ln \left( \frac{2t^2(t+1)}{\delta} \right) \sigma(\sigma+1)}{m(u+\gamma) \sqrt{u+1}}$$

## Proof of Equation (20)

$$-2\eta_u \sum_{s=1}^{u-1} \frac{(u-s+\gamma)\langle v_{u-s}, \psi_{u-s+1}^{(v)} \rangle}{u+\gamma} \leq \frac{2}{m(u+\gamma)^2} \sum_{s=1}^{u-1} \langle \theta_{u-s} - \theta^*, \psi_{u-s+1}^{(v)} \rangle$$

Fix a  $u \in \{1, \dots, t\}$  and denote by  $Y_s^{(u)} := (u-s+\gamma)\langle \theta_{u-s} - \theta^*, \psi_{u-s+1}^{(v)} \rangle$ . Since  $\theta_{u-s}$  is measurable with respect to the sigma-algebra generated by  $\mathcal{F}_{u-s}$ , the conditional expectation  $\mathbb{E}[Y_s^{(u)} | \mathcal{F}_{u-s}] = 0$ . Thus,  $(Y_s^{(u)})_{s=1}^{u-1}$  is a martingale difference sequence with respect to the filtration  $(\mathcal{F}_{u-s})_{s=1}^{u-1}$ . Furthermore, we have from Equation (10) that  $|Y_s^{(u)}| \leq 2(u-s+\gamma) \left( \xi_{u-s}^{(t)} + \frac{\gamma R_1}{(u+\gamma-1)} \right) \lambda \leq 2\lambda(u+\gamma)\xi_u^{(t)} + 2\lambda\gamma G$ . We can now bound the sum of conditional variances as

$$\begin{aligned} \sum_{s=1}^{u-1} \text{Var}(Y_s^{(u)} | \mathcal{F}_{u-s}) &\leq \sum_{s=1}^{u-1} 4(u-s+\gamma)^2 (\xi_{u-s}^{(t)})^2 \lambda^2 \sigma^2 + 4\lambda^2 G^2, \\ &\stackrel{(18)}{\leq} 12\lambda^2 \sigma^2 (u+\gamma)^2 (u+1) \log(u+1) (\xi_u^{(t)})^2 + 4\lambda^2 \gamma^2 G^2 u. \end{aligned}$$

Step (a) follows since  $\eta m < 1$ . Now applying the bound in Equation (24) with  $B := 2\lambda(u+\gamma)\xi_u^{(t)} + 2\lambda G$  and  $v = 12\lambda^2 \sigma^2 (u+\gamma)^2 (u+1) \log(u+1) (\xi_u^{(t)})^2 + 4\lambda^2 \gamma^2 G^2 u$ , we get that with probability at-least  $1 - \delta/(2t^2(t+1))$ ,

$$\begin{aligned} \sum_{s=1}^{u-1} (u-s+\gamma)\langle v_{u-s}, \psi_{u-s+1}^{(v)} \rangle &\leq 2\lambda \left( (u+\gamma)\xi_u^{(t)} + R_1 \right) \ln \left( \frac{2t^2(t+1)}{\delta} \right) + \left[ \left( 2\lambda \left( (u+\gamma)\xi_u^{(t)} + G \right) \ln \left( \frac{2t^2(t+1)}{\delta} \right) \right)^2 \right. \\ &\quad \left. + \left( \lambda^2 \sigma^2 (u+\gamma)^2 (u+1) \log(u+1) (\xi_u^{(t)})^2 + 4\lambda^2 \gamma^2 G^2 (u+1) \right) \ln \left( \frac{2t^2(t+1)}{\delta} \right) \right]^{\frac{1}{2}}, \\ &\leq 6(u+\gamma)\sqrt{u+1} \log(u+1) (\xi_u^{(t)}) \lambda \sigma (\sigma+1) \ln \left( \frac{2t^2(t+1)}{\delta} \right) + 2\lambda\gamma G \sqrt{(u+1) \ln \left( \frac{2t^2(t+1)}{\delta} \right)}. \end{aligned}$$

Thus,

$$\begin{aligned} -2\eta_u \sum_{s=1}^{u-1} \frac{(u-s+\gamma)\langle v_{u-s}, \psi_{u-s+1}^{(v)} \rangle}{u+\gamma} &\leq \frac{12\sqrt{u+1} \log(u+1) (\xi_u^{(t)}) \lambda \sigma (\sigma+1) \ln \left( \frac{2t^2(t+1)}{\delta} \right)}{(u+\gamma)} + \frac{C_t \gamma G}{10(u+1)}, \\ &\leq \frac{\xi_u^{(t)} \ln \left( \frac{2t^2(t+1)}{\delta} \right)}{10\sqrt{u+1}} + \frac{C_t G}{10(u+1)}. \end{aligned}$$

The first inequality follows since  $C_t \geq \frac{8\lambda\sqrt{\ln\left(\frac{2t^3}{\delta}\right)}}{\gamma^2 G}$ . The last inequality follows since for all times  $u \leq t$ , we have

$$\frac{12\sqrt{u+1} \log(u+1) \lambda \sigma (\sigma+1) \ln \left( \frac{2t^2(t+1)}{\delta} \right)}{(u+\gamma)} \leq \frac{\ln \left( \frac{2t^2(t+1)}{\delta} \right)}{10}$$

as a consequence of  $\gamma \geq 120\lambda\sigma(\sigma+1)$ .

□

## C PROOFS FROM SECTION 4.2

### C.1 PROOF OF THEOREM 4.1

We bound this probability using the result of 3.1 and a simple union bound argument. For any process  $\mathfrak{M}$ , observe that

$$\mathbb{P}[\exists t \in [r+1, \tau_c^{(r)}) \text{ s.t. } \mathcal{A}_t = 1 | \mathcal{A}_r = 1] = \mathbb{P}[\cup_{t=r+1}^{\tau_c-1} \mathcal{A}_t = 1 | \mathcal{A}_r = 1]$$



$$\leq \sum_{t=r+1}^{\tau_c-1} \mathbb{P}[\mathcal{A}_t = 1 | \mathcal{A}_r = 1]. \quad (25)$$

We now examine the above Equation to bound it. For any fixed  $t \in (r, \tau_c^{(r)})$

$$\begin{aligned} \mathbb{P}[\mathcal{A}_t = 1 | \mathcal{A}_r = 1] &= \mathbb{P} \left[ \bigcup_{s=r+1}^{t-1} \|\widehat{\theta}_{r:s} - \widehat{\theta}_{s+1:t}\| \geq \mathcal{B} \left( s-r, \frac{\delta}{2t(t+1)} \right) + \mathcal{B} \left( t-s-1, \frac{\delta}{2t(t+1)} \right) \right], \\ &\leq \sum_{s=r+1}^{t-1} \left( \mathbb{P} \left[ \|\widehat{\theta}_{r:s} - \theta_{c-1}\| \geq \mathcal{B} \left( s-r, \frac{\delta}{2t(t+1)} \right) \right] + \mathbb{P} \left[ \|\widehat{\theta}_{s+1:t} - \theta_{c-1}\| \geq \mathcal{B} \left( t-s-1, \frac{\delta}{2t(t+1)} \right) \right] \right), \\ &\stackrel{(a)}{\leq} \sum_{s=r+1}^{t-1} \left( \frac{\delta}{2t(t+1)(s-r)(s-r+1)} + \frac{\delta}{2t(t+1)(t-s-1)(t-s)} \right), \\ &= \frac{\delta}{2t(t+1)} \left( \sum_{s=r+1}^{t-1} \frac{1}{(s-r)(s-r+1)} + \sum_{s=r+1}^{t-1} \frac{1}{(t-s-1)(t-s)} \right), \\ &\leq \frac{\delta}{2t(t+1)} \left( \sum_{s=1}^{t-1-r} \frac{1}{s(s+1)} + \sum_{s=1}^{t-1-r} \frac{1}{s(s+1)} \right), \\ &\stackrel{(b)}{\leq} \frac{\delta}{t(t+1)}. \end{aligned} \quad (26)$$

Since for all  $t < \tau_c^{(r)}$ , the mean of the random variables  $X_{r+1}, \dots, X_t$  are identical and equal to  $\theta_{c-1}$  (see notation in Section 2), Theorem 3.1 gives rise to inequality (a). Step (b) follows from the fact that  $\sum_{s \geq 1} \frac{1}{s(s+1)} = 1$ . Now substituting the bound from Equation (26) into Equation (25), we get that

$$\begin{aligned} \mathbb{P}[\exists t \in [r+1, \tau_c^{(r)}) \text{ s.t. } \mathcal{A}_t = 1 | \mathcal{A}_r = 1] &\leq \sum_{t=r+1}^{\tau_c-1} \frac{\delta}{t(t+1)}, \\ &\leq \sum_{t \geq 1} \frac{\delta}{t(t+1)}, \\ &= \delta. \end{aligned}$$

Since the above bound holds for all  $r$  and process  $\mathfrak{M}$ , we have

$$\sup_{\mathfrak{M}, r} \mathbb{P}[\exists t \in [r+1, \tau_c^{(r)}) \text{ s.t. } \mathcal{A}_t = 1 | \mathcal{A}_r = 1] \leq \delta.$$

## C.2 PROOF OF LEMMA 4.2

Recall from the definition that the  $r$ th detection is false if

$$\chi_r^{(A)} = \mathbf{1}(\bar{\mathcal{A}}c \text{ s.t. } \tau_c \in (t_{r-1}^{(A)}, t_r^{(A)}]).$$

We will show that  $\mathbb{E}[\chi_r^{(A)}] \leq \delta$ . This will then conclude the proof of the lemma.

$$\begin{aligned} \mathbb{E}[\chi_r^{(A)}] &= \mathbb{P}[\bar{\mathcal{A}}c \text{ s.t. } \tau_c \in (t_{r-1}^{(A)}, t_r^{(A)})], \\ &= \mathbb{E} \left[ \mathbb{P}[\bar{\mathcal{A}}c \text{ s.t. } \tau_c^{(s)} \in (s, t_r^{(A)}) \mid t_{r-1}^{(A)} = s] \right], \\ &\leq \mathbb{E} \left[ \mathbb{P}[\cup_{t=s+1}^{\infty} \tau_c^{(s)} = t, t_r^{(A)} < t \mid t_{r-1}^{(A)} = s] \right], \end{aligned}$$

$$\begin{aligned}
&\leq \mathbb{E} \left[ \mathbb{P}[\exists t \in [s+1, \tau_c^{(s)}], \mathcal{A}_t = 1] \middle| t_{r-1}^{(A)} = s \right], \\
&\stackrel{(a)}{\leq} \mathbb{E} \left[ \mathbb{P}[\exists t \in [s+1, \tau_c^{(s)}], \mathcal{A}_t = 1 | \mathcal{A}_s = 1] \middle| t_{r-1}^{(A)} = s \right], \\
&\stackrel{(b)}{\leq} \delta.
\end{aligned}$$

Inequality (a) follows from the fact that on the event  $t_{r-1}^{(A)} = s, \mathcal{A}_s = 1$ . Inequality (b) follows from Theorem 4.1.

## D PROOF OF LEMMA 4.3

The proof follows from a straightforward application of Theorem 3.1 as follows. Let  $n \in \mathbb{N}, \Delta > 0$  and  $\delta' \in (0, 1)$  be arbitrary.

$$\begin{aligned}
\mathbb{P}[\mathcal{D}(n, \Delta, \delta') \geq d] &= \mathbb{P}[\cap_{s=1}^{n+d} \mathcal{A}(X_{1:s}) = 0], \\
&= \mathbb{P} \left[ \bigcap_{s=1}^{n+d} \|\widehat{\theta}_{1:s} - \widehat{\theta}_{s+1:n+d}\|_2^2 \leq \mathcal{B} \left( s, \frac{\delta}{2(n+d)(n+d+1)} \right) + \mathcal{B} \left( n+d-s-1, \frac{\delta}{2(n+d)(n+d+1)} \right) \right], \\
&\leq \mathbb{P} \left[ \|\widehat{\theta}_{1:n-1} - \widehat{\theta}_{n:n+d}\|_2^2 \leq \mathcal{B} \left( n-1, \frac{\delta}{2(n+d)(n+d+1)} \right) + \mathcal{B} \left( d, \frac{\delta}{2(n+d)(n+d+1)} \right) \right].
\end{aligned} \tag{27}$$

From triangle-inequality, we know that

$$\begin{aligned}
\|\widehat{\theta}_{1:n-1} - \widehat{\theta}_{n:n+d}\|_2^2 &\geq \|\theta_1 - \theta_2\|_2^2 - \|\widehat{\theta}_{1:n-1} - \theta_1\|_2^2 - \|\widehat{\theta}_{n:n+d} - \theta_2\|_2^2, \\
&= \Delta^2 - \|\widehat{\theta}_{1:n-1} - \theta_1\|_2^2 - \|\widehat{\theta}_{n:n+d} - \theta_2\|_2^2.
\end{aligned} \tag{28}$$

Thus, substituting Equation (28) into Equation (27), we get that

$$\begin{aligned}
\mathbb{P}[\mathcal{D}(n, \Delta, \delta') \geq d] &\leq \mathbb{P} \left[ \Delta^2 - \|\widehat{\theta}_{1:n-1} - \theta_1\|_2^2 - \|\widehat{\theta}_{n:n+d} - \theta_2\|_2^2 \leq \right. \\
&\quad \left. \mathcal{B} \left( n-1, \frac{\delta}{2(n+d)(n+d+1)} \right) + \mathcal{B} \left( d, \frac{\delta}{2(n+d)(n+d+1)} \right) \right].
\end{aligned}$$

Denote by the events  $\mathcal{E}_i$  for  $i \in \{1, 2\}$  as

$$\begin{aligned}
\mathcal{E}_1 &:= \left\{ \|\widehat{\theta}_{1:n-1} - \theta_1\|_2^2 > \mathcal{B} \left( n-1, \frac{\delta'}{2} \right) \right\}, \\
\mathcal{E}_2 &:= \left\{ \|\widehat{\theta}_{n:n+d} - \theta_2\|_2^2 > \mathcal{B} \left( d, \frac{\delta'}{2} \right) \right\},
\end{aligned}$$

Denote by  $\mathcal{E} := \mathcal{E}_1 \cup \mathcal{E}_2$ . Theorem 3.1 gives that  $\mathbb{P}[\mathcal{E}_1] \leq \frac{\delta'}{2(n(n+1))} \leq \frac{\delta'}{2}$  and  $\mathbb{P}[\mathcal{E}_2] \leq \frac{\delta'}{2d(d+1)} \leq \frac{\delta'}{2}$ . Thus, an union bound gives that  $\mathbb{P}[\mathcal{E}] \leq \delta'$ . Let  $d' \in \mathcal{G}$  be arbitrary, where

$$\mathcal{G} := \left\{ d \in \mathbb{N} : \Delta^2 \geq \mathcal{B} \left( n-1, \frac{\delta'}{2} \right) + \mathcal{B} \left( d, \frac{\delta'}{2} \right) + \mathcal{B} \left( n, \frac{\delta}{2(n+d+1)(n+d)} \right) + \mathcal{B} \left( d, \frac{\delta}{2(n+d+1)(n+d)} \right) \right\} \tag{29}$$

**Claim :** If the event  $\mathcal{E}^c$  holds, then  $\mathcal{D}(n, \Delta, \delta) \leq d$  for all  $d \in \mathcal{G}$ .

Suppose  $d \in \mathcal{G}$  and event  $\mathcal{E}^c$  holds. Then, we know by triangle inequality in Equation (28) that

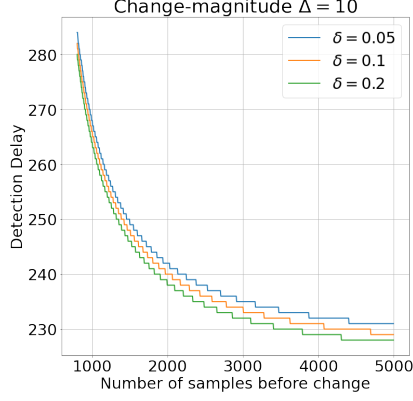

Figure 1: Plot of  $\mathcal{D}(n, \Delta, \delta')$  in Lemma 4.3 for fixed  $\Delta = 10, \delta = 0.1$ .

$$\begin{aligned} \|\widehat{\theta}_{1:n-1} - \widehat{\theta}_{n:n+d}\|_2^2 &\geq \|\theta_1 - \theta_2\|_2^2 - \|\widehat{\theta}_{1:n-1} - \theta_1\|_2^2 - \|\widehat{\theta}_{n:n+d} - \theta_2\|_2^2, \\ &= \Delta^2 - \|\widehat{\theta}_{1:n-1} - \theta_1\|_2^2 - \|\widehat{\theta}_{n:n+d} - \theta_2\|_2^2, \end{aligned} \quad (30)$$

$$\stackrel{(a)}{\geq} \Delta^2 - \mathcal{B}\left(n-1, \frac{\delta'}{2}\right) - \mathcal{B}\left(d, \frac{\delta'}{2}\right), \quad (31)$$

$$\stackrel{(b)}{\geq} \mathcal{B}\left(n, \frac{\delta}{2(n+d+1)(n+d)}\right) + \mathcal{B}\left(d, \frac{\delta}{2(n+d+1)(n+d)}\right). \quad (32)$$

Step (a) follows from the definition of event  $\mathcal{E}$  and on the assumption of the claim that event  $\mathcal{E}^c$  holds. Step (b) follows from the fact that  $d \in \mathcal{G}$  is arbitrary (cf. Equation (29)). The last step says from Line 8 of Algorithm 1 that if no detection has been made till time  $n+d$ , then under the event  $\mathcal{E}^c$ , time step  $d$  is a detection time. Since event  $\mathcal{E}^c$  holds with probability at-least  $1 - \delta'$ , this concludes the proof.

## D.1 USEFUL CONVEXITY BASED INEQUALITIES

Let  $f : \Theta \rightarrow \mathbb{R}$  be a strongly convex function with strong convexity parameters  $0 < m \leq M < \infty$ . Denote by  $\theta^* := \arg \min_{\theta \in \Theta} f(\theta)$ . Since  $f(\cdot)$  is convex and  $\Theta$  is convex and compact, the existence and uniqueness of  $\theta^*$  is guaranteed. Strong convexity gives that for any  $\widehat{\theta}_{t-1} \in \Theta$ ,

$$f(\theta^*) \geq f(\widehat{\theta}_{t-1}) + \langle \nabla f(\widehat{\theta}_{t-1}), \theta^* - \widehat{\theta}_{t-1} \rangle + \frac{m}{2} \|\theta^* - \widehat{\theta}_{t-1}\|_2^2. \quad (33)$$

Further since  $\theta^* = \arg \min_{\theta \in \Theta} f(\theta)$ , we have that

$$f(\widehat{\theta}_{t-1}) - f(\theta^*) \geq \frac{m}{2} \|\widehat{\theta}_{t-1} - \theta^*\|_2^2.$$

Putting these two together, we see that

$$\langle \nabla f(\widehat{\theta}_{t-1}), \widehat{\theta}_{t-1} - \theta^* \rangle \geq m \|\widehat{\theta}_{t-1} - \theta^*\|_2^2. \quad (34)$$

Also, We further use the following lemma.

**Lemma D.1** (Lemma 3.11 from [Bubeck, 2015]). *Let  $g : \mathbb{R}^d \rightarrow \mathbb{R}$  be a  $M$  smooth and  $m$  strongly convex function. Then for all  $x, y \in \mathbb{R}^d$ ,*

$$\langle \nabla g(x) - \nabla g(y), x - y \rangle \geq \frac{mM}{M+m} \|x - y\|_2^2 + \frac{1}{M+m} \|\nabla g(x) - \nabla g(y)\|_2^2.$$

By substituting  $x = \widehat{\theta}_{t-1}$ ,  $y = \theta^*$  and  $g(\cdot) = f(\cdot)$  and by leveraging the fact that  $\nabla f(\theta^*) = 0$ , we get the inequality that

$$\langle \nabla f(\widehat{\theta}_{t-1}), \widehat{\theta}_{t-1} - \theta^* \rangle \geq \frac{mM}{m+M} \|\widehat{\theta}_{t-1} - \theta^*\|_2^2 + \frac{1}{M+m} \|\nabla f(\widehat{\theta}_{t-1})\|_2^2.$$

Re-arranging, we see that

$$\|\nabla f(\hat{\theta}_{t-1})\|_2^2 \leq (M + m)\langle \nabla f(\hat{\theta}_{t-1}), \hat{\theta}_{t-1} - \theta^* \rangle - mM\|\hat{\theta}_{t-1} - \theta^*\|_2^2. \quad (35)$$

## E ADDITIONAL SIMULATIONS

In Figure 2, we plot a sample path of observed data and mark out the true change-points and the detected time-instants by Algorithm 1. The plots indicate that although visually identifying the change in the means is hard, our change-point detection algorithm is able to consistently across variety of distribution families.

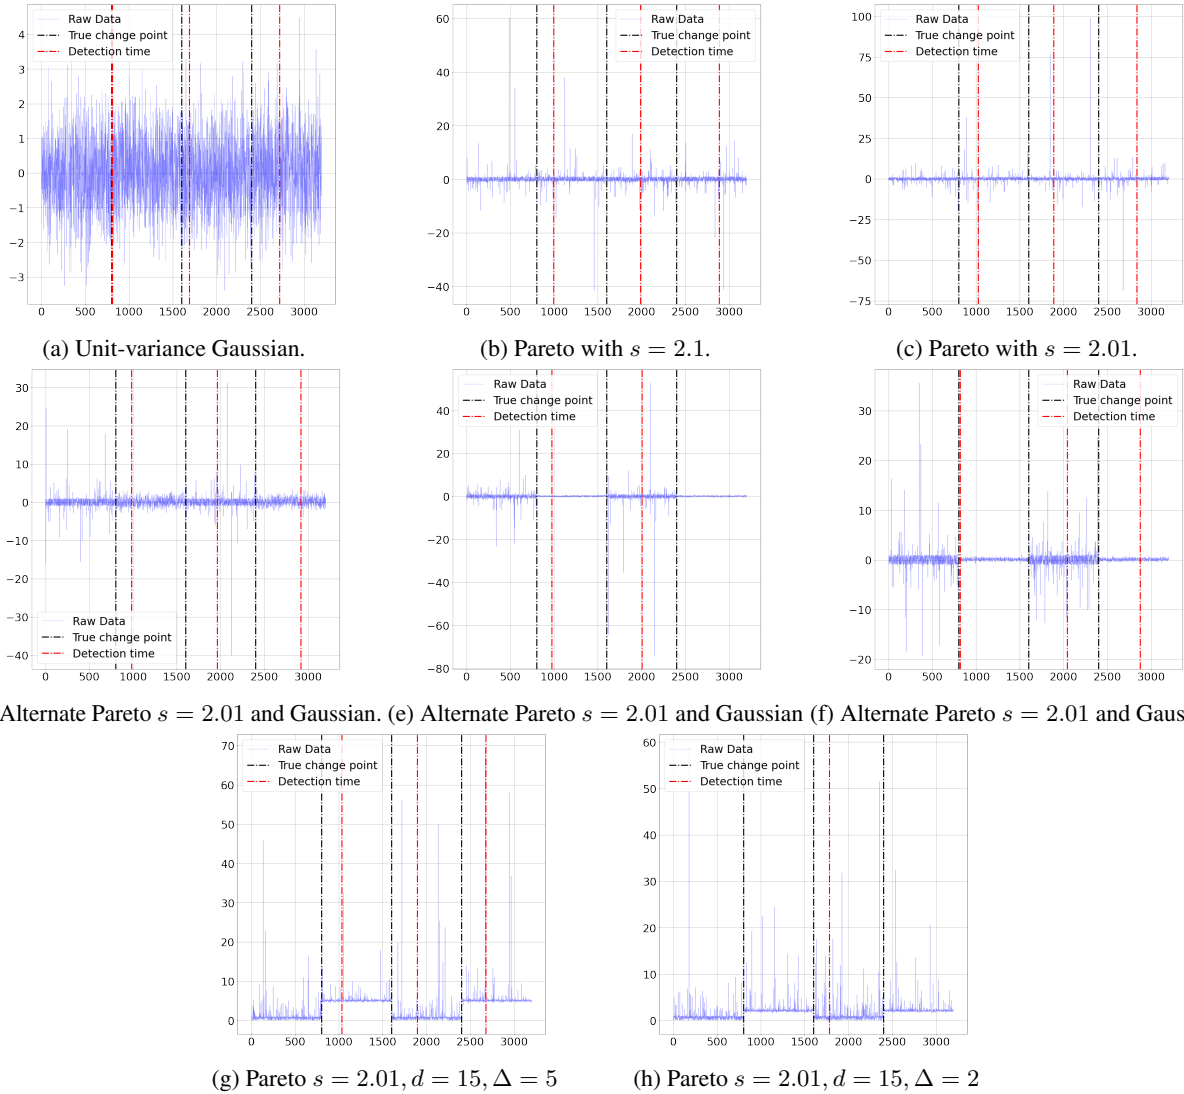

Figure 2: In all plots, we choose the change-point gap to be  $\Delta = 0.1$  and  $\delta = 0.05$  except (g) and (h) where  $\Delta = 5$  and 2 respectively. In plots (g) and (h), we plot the norm of the observed random vector and thus the Y-axis is non-negative. We see missed detection in Figures (e) and (h) with the last change-point on the right being missed. We do not observe False-positives in these plots.
