# Supplementary material
Source: ML conference proceedings conference paper supplement (https://openreview.net/forum?id=VZ63F7l3aD)

# Location of detected change-points

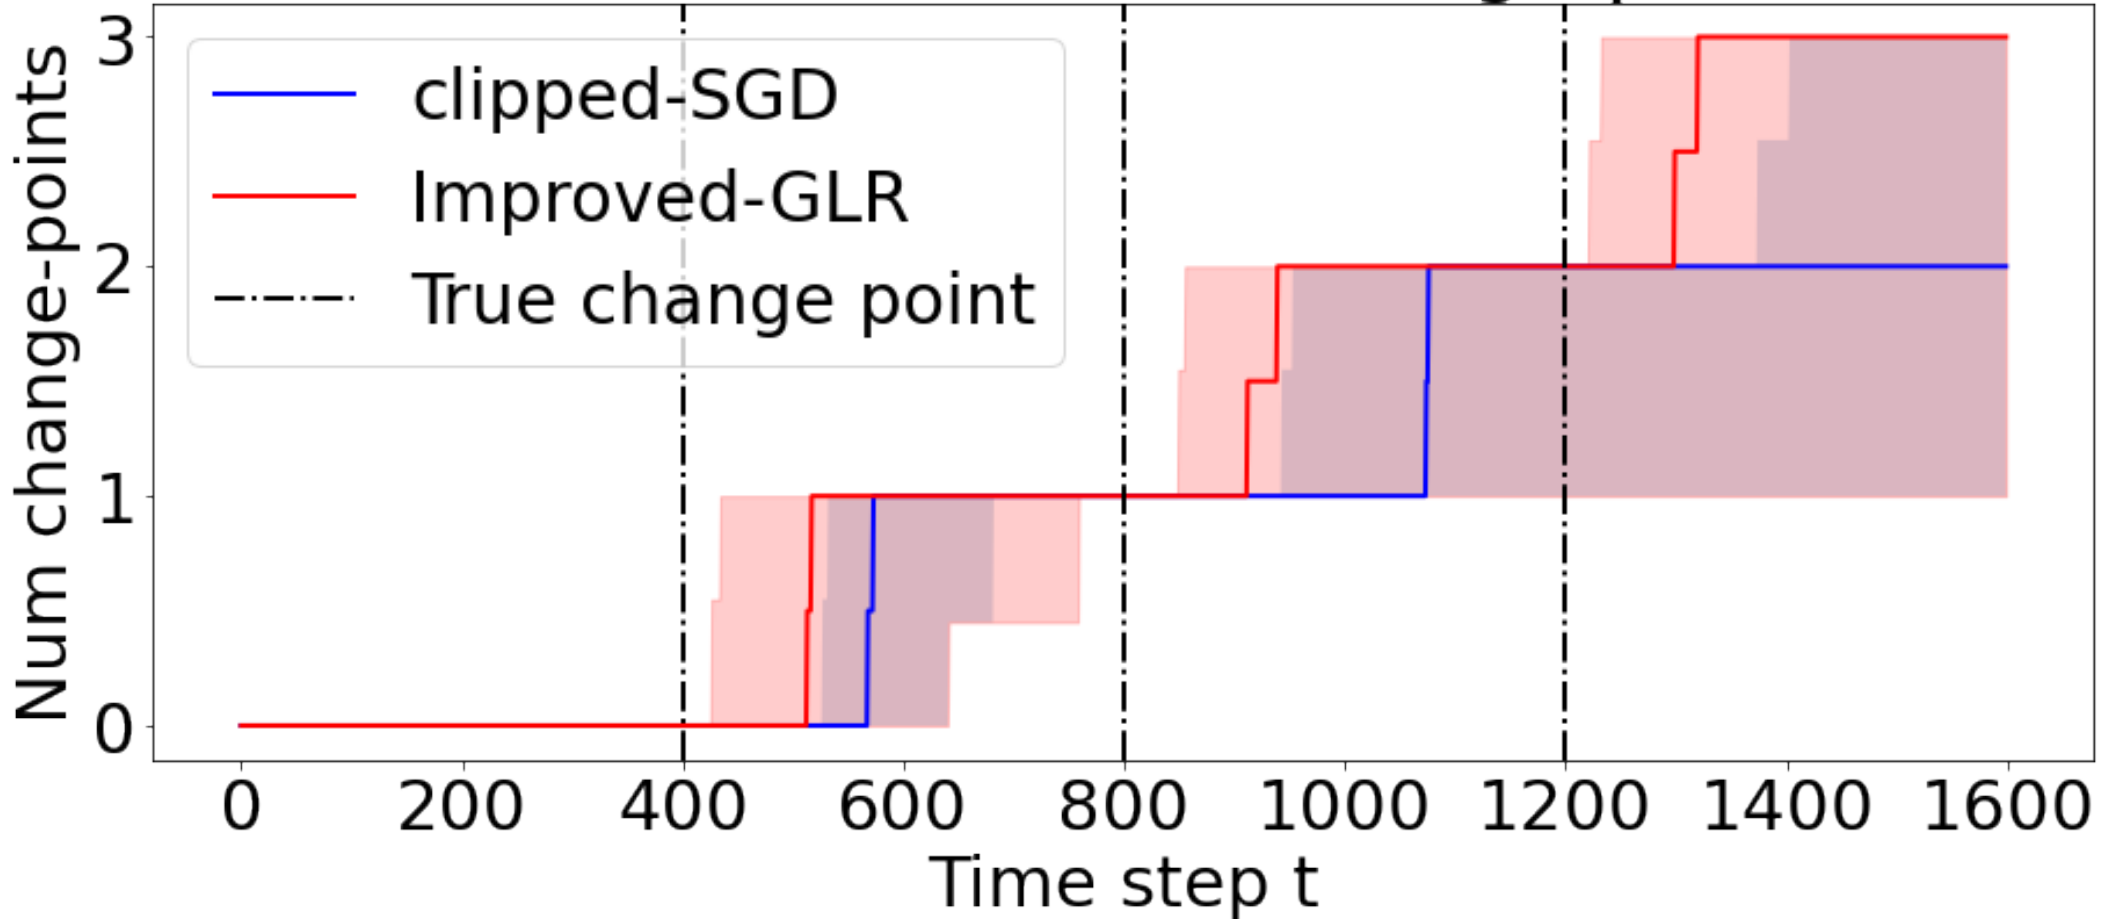

Supplement: supplementary_material [file attachment]

clipped-SGD

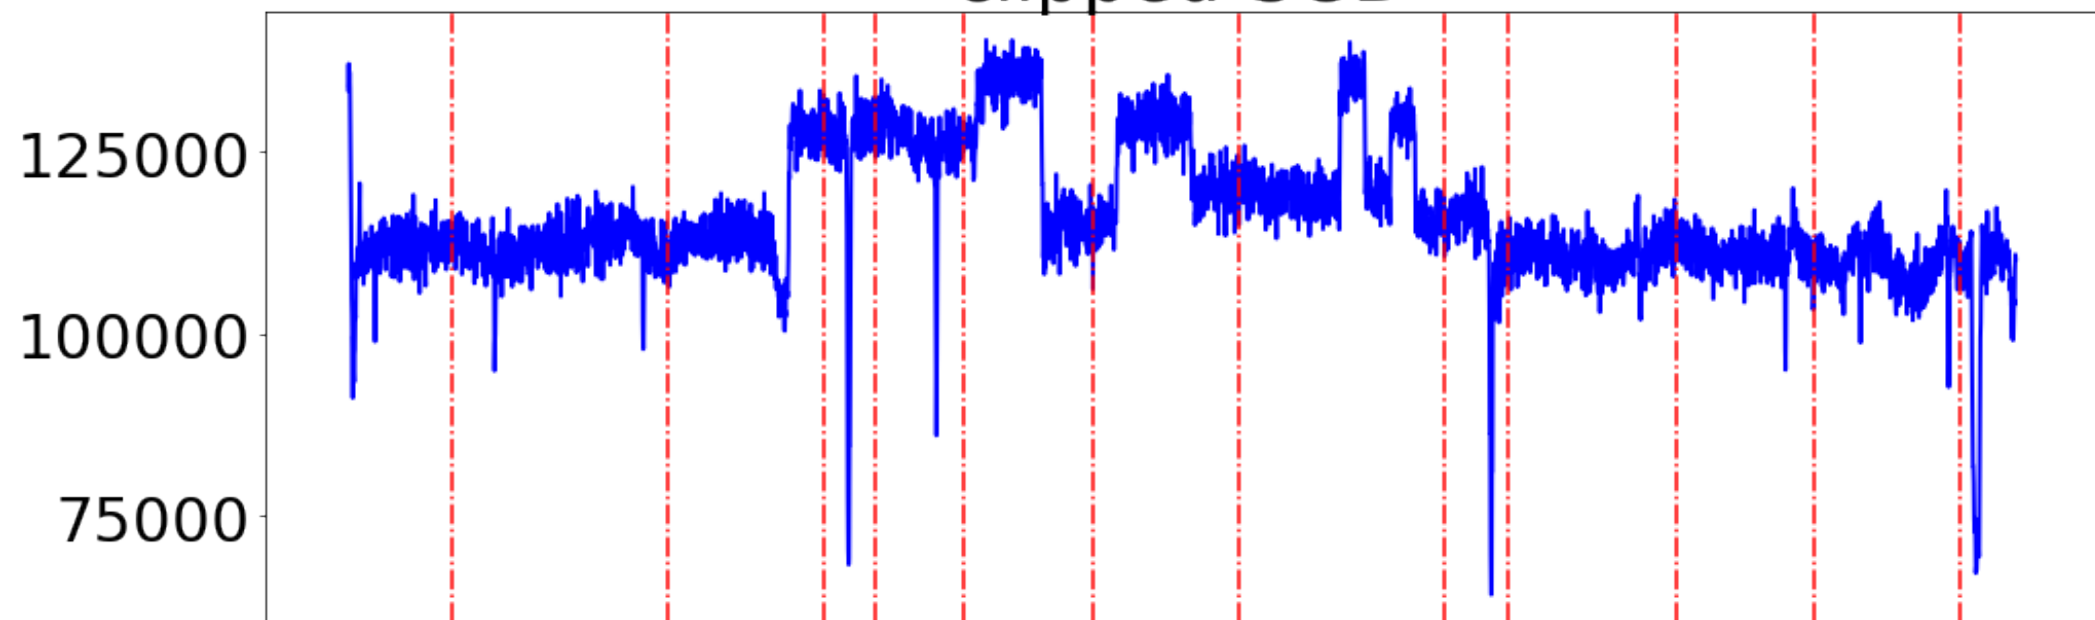

Improved GLR

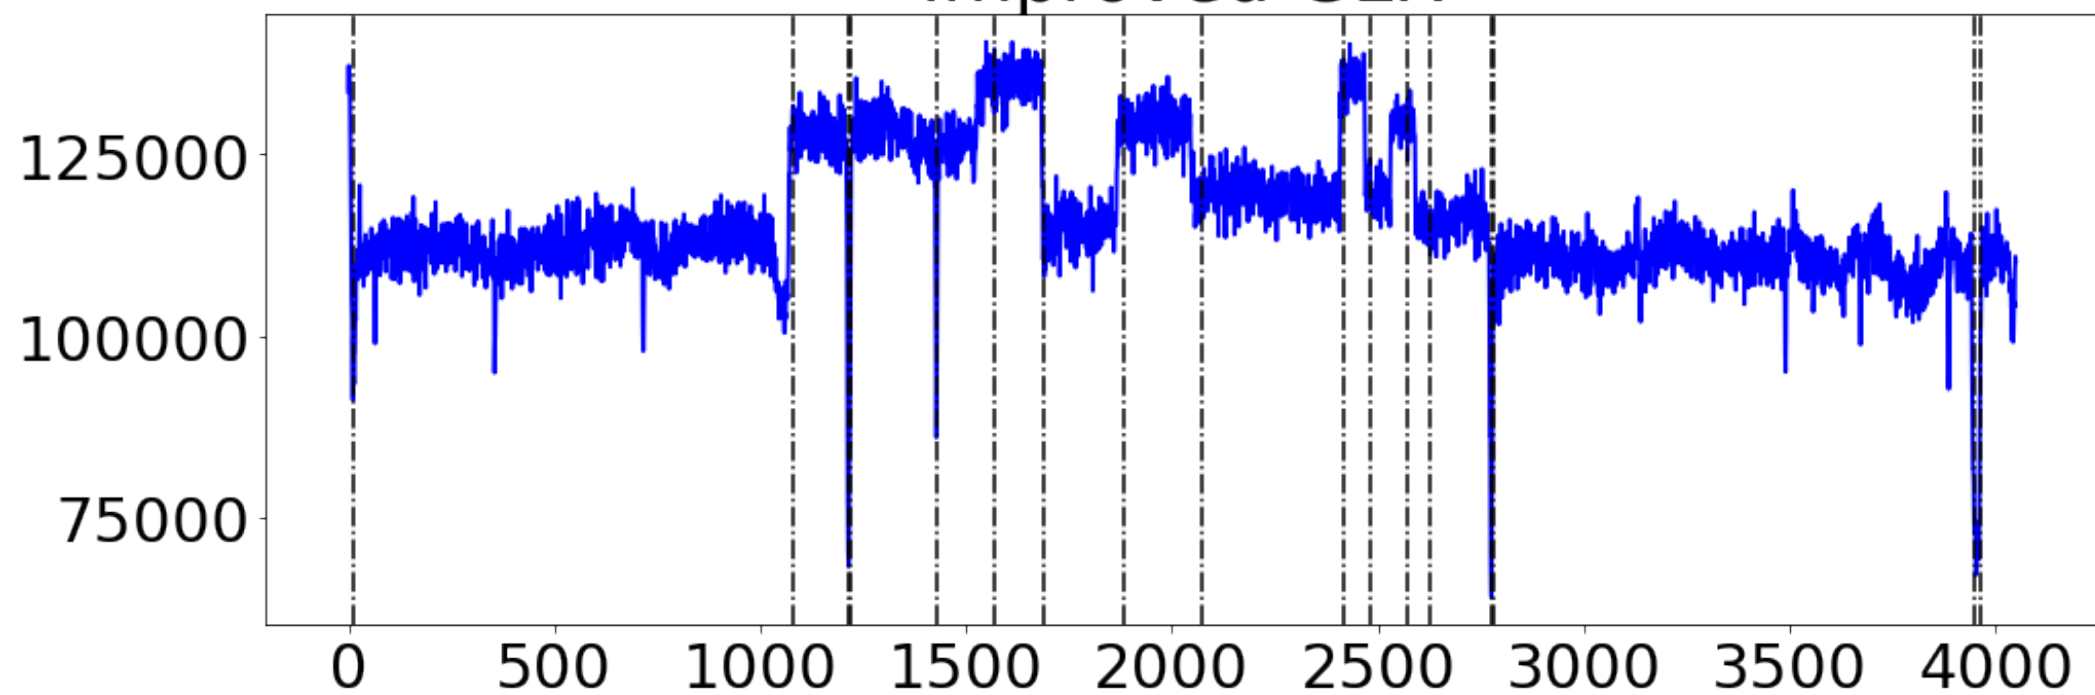

Supplement: supplementary_material [file attachment]

Location of detected change-points

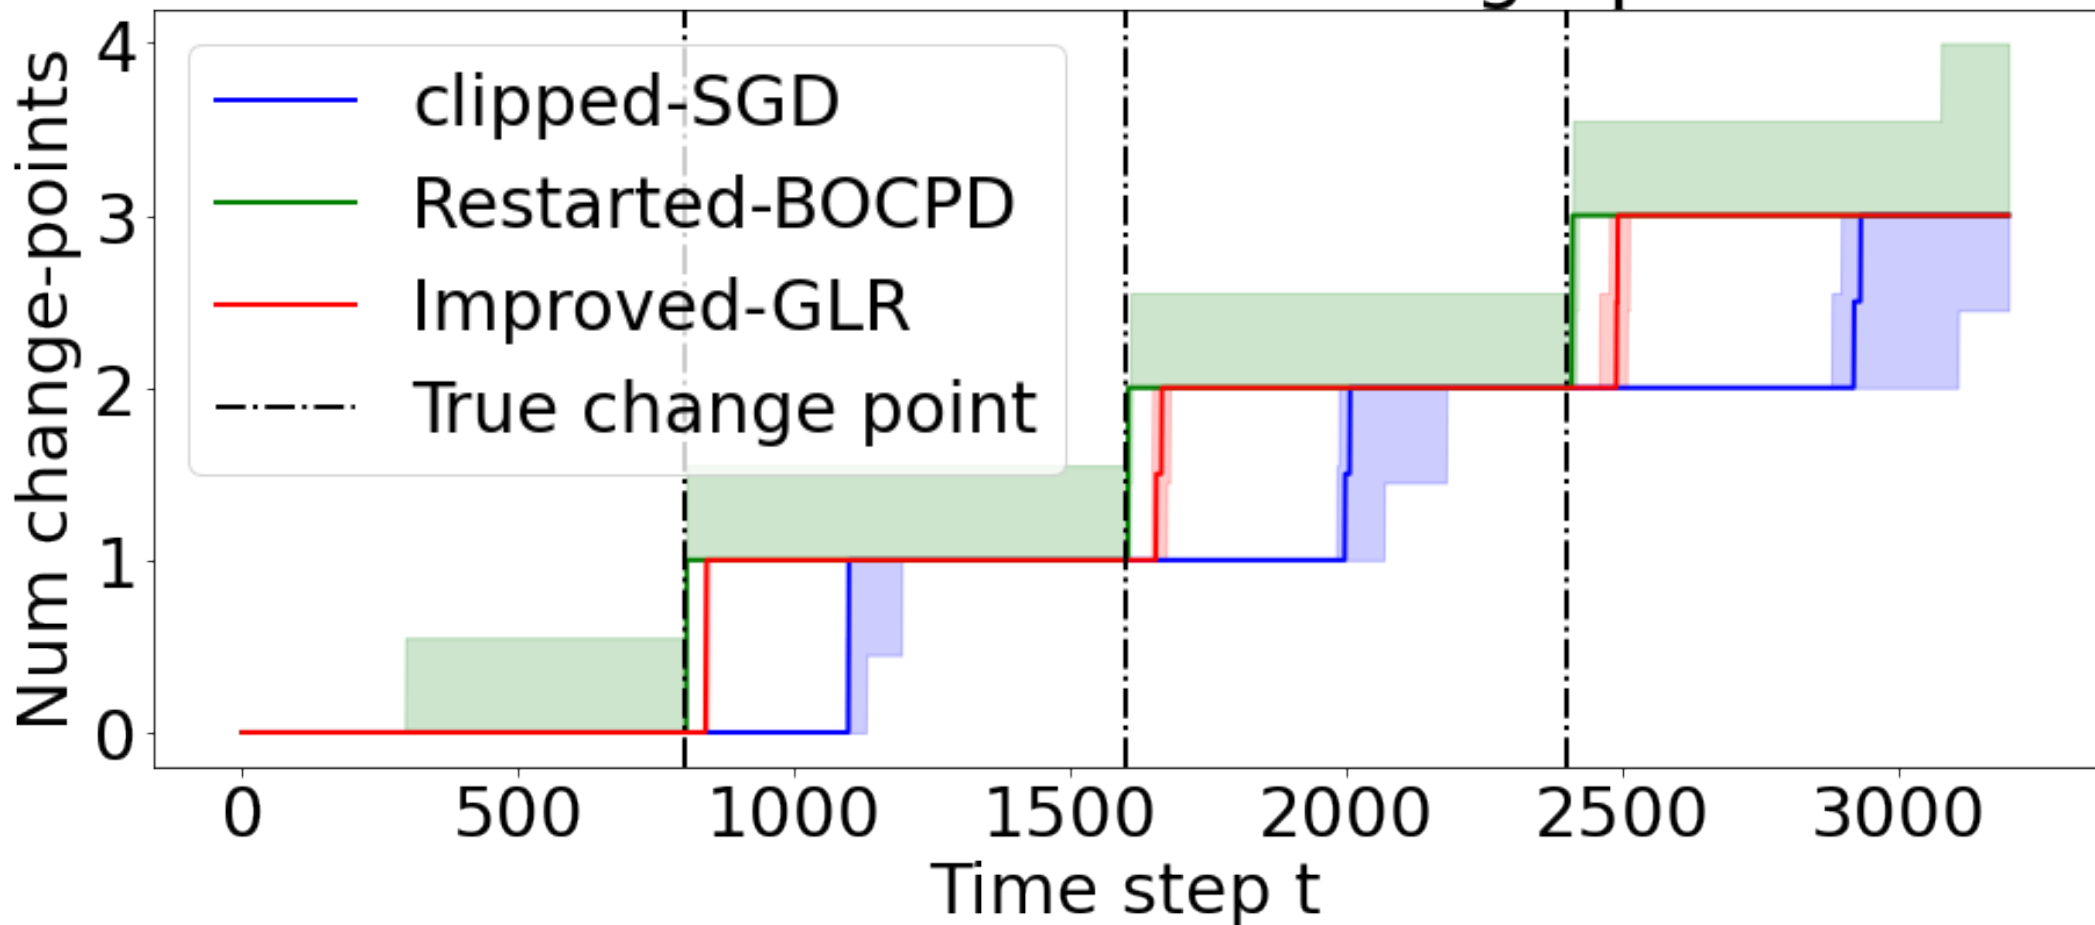

Supplement: supplementary_material [file attachment]

# Location of detected change-points

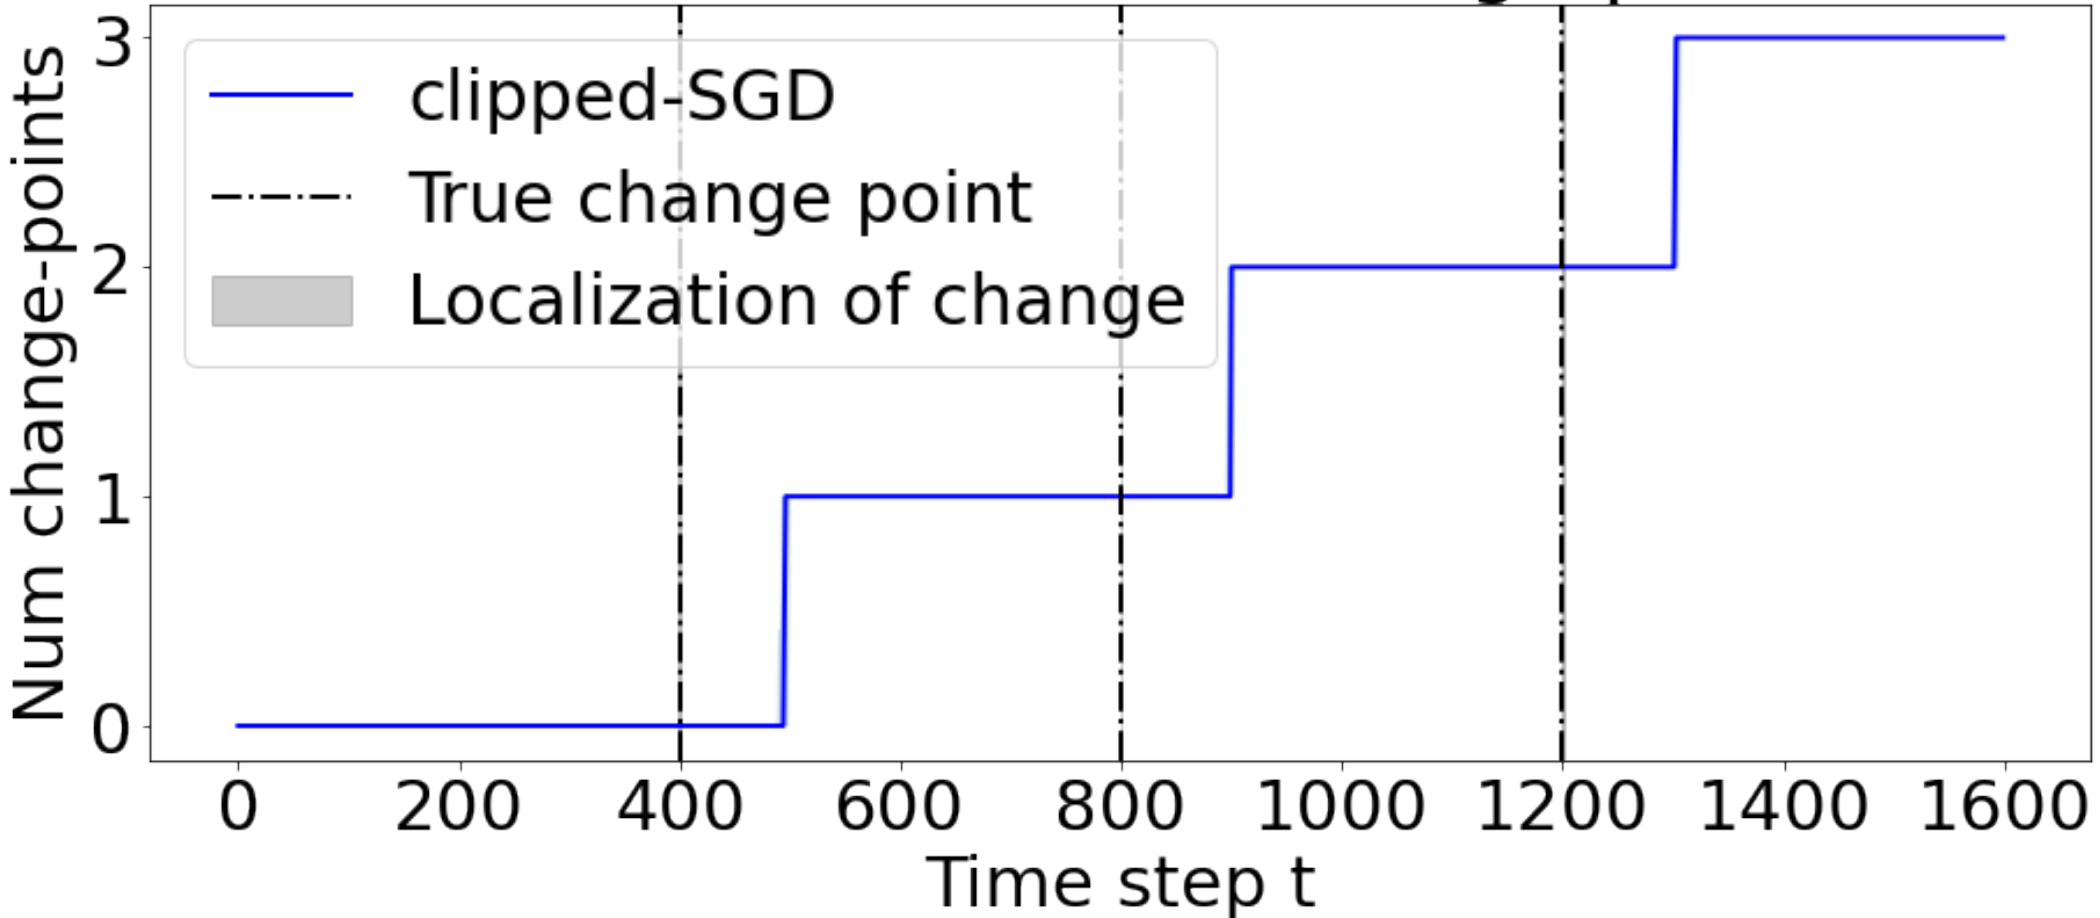

Supplement: supplementary_material [file attachment]

# Location of detected change-points

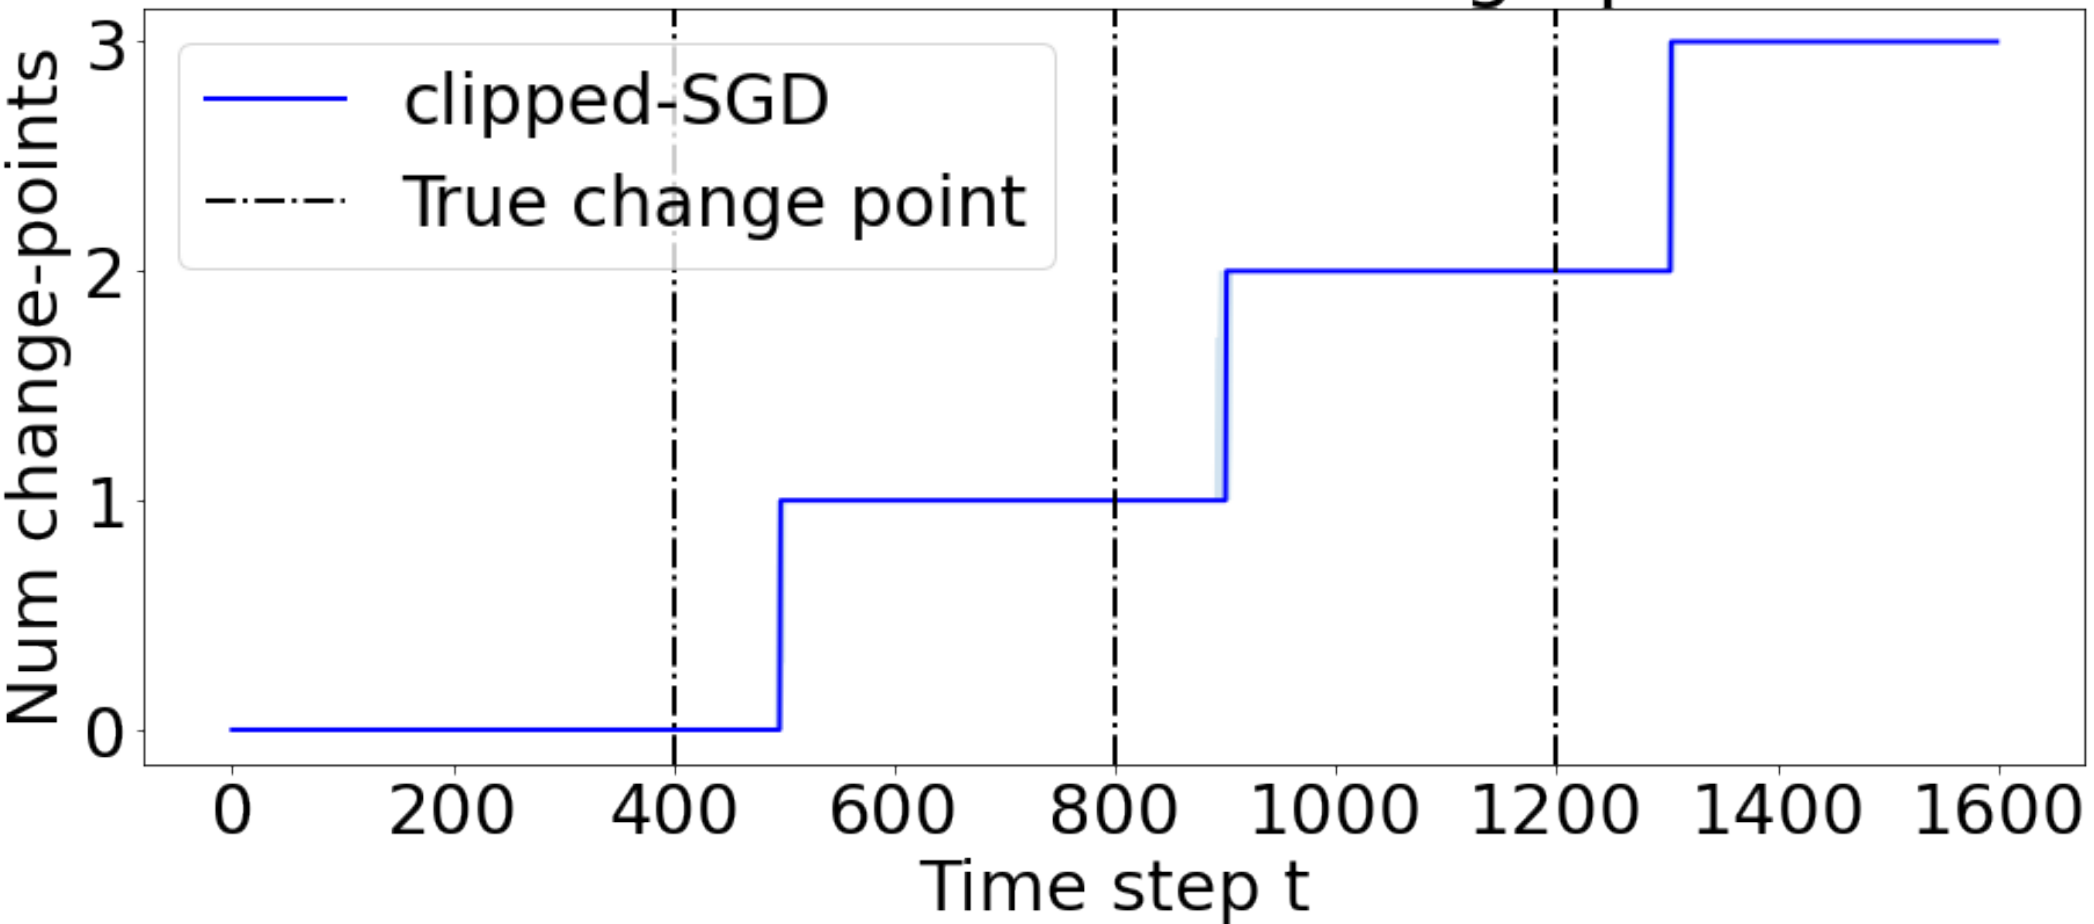

Supplement: supplementary_material [file attachment]

# Location of detected change-points

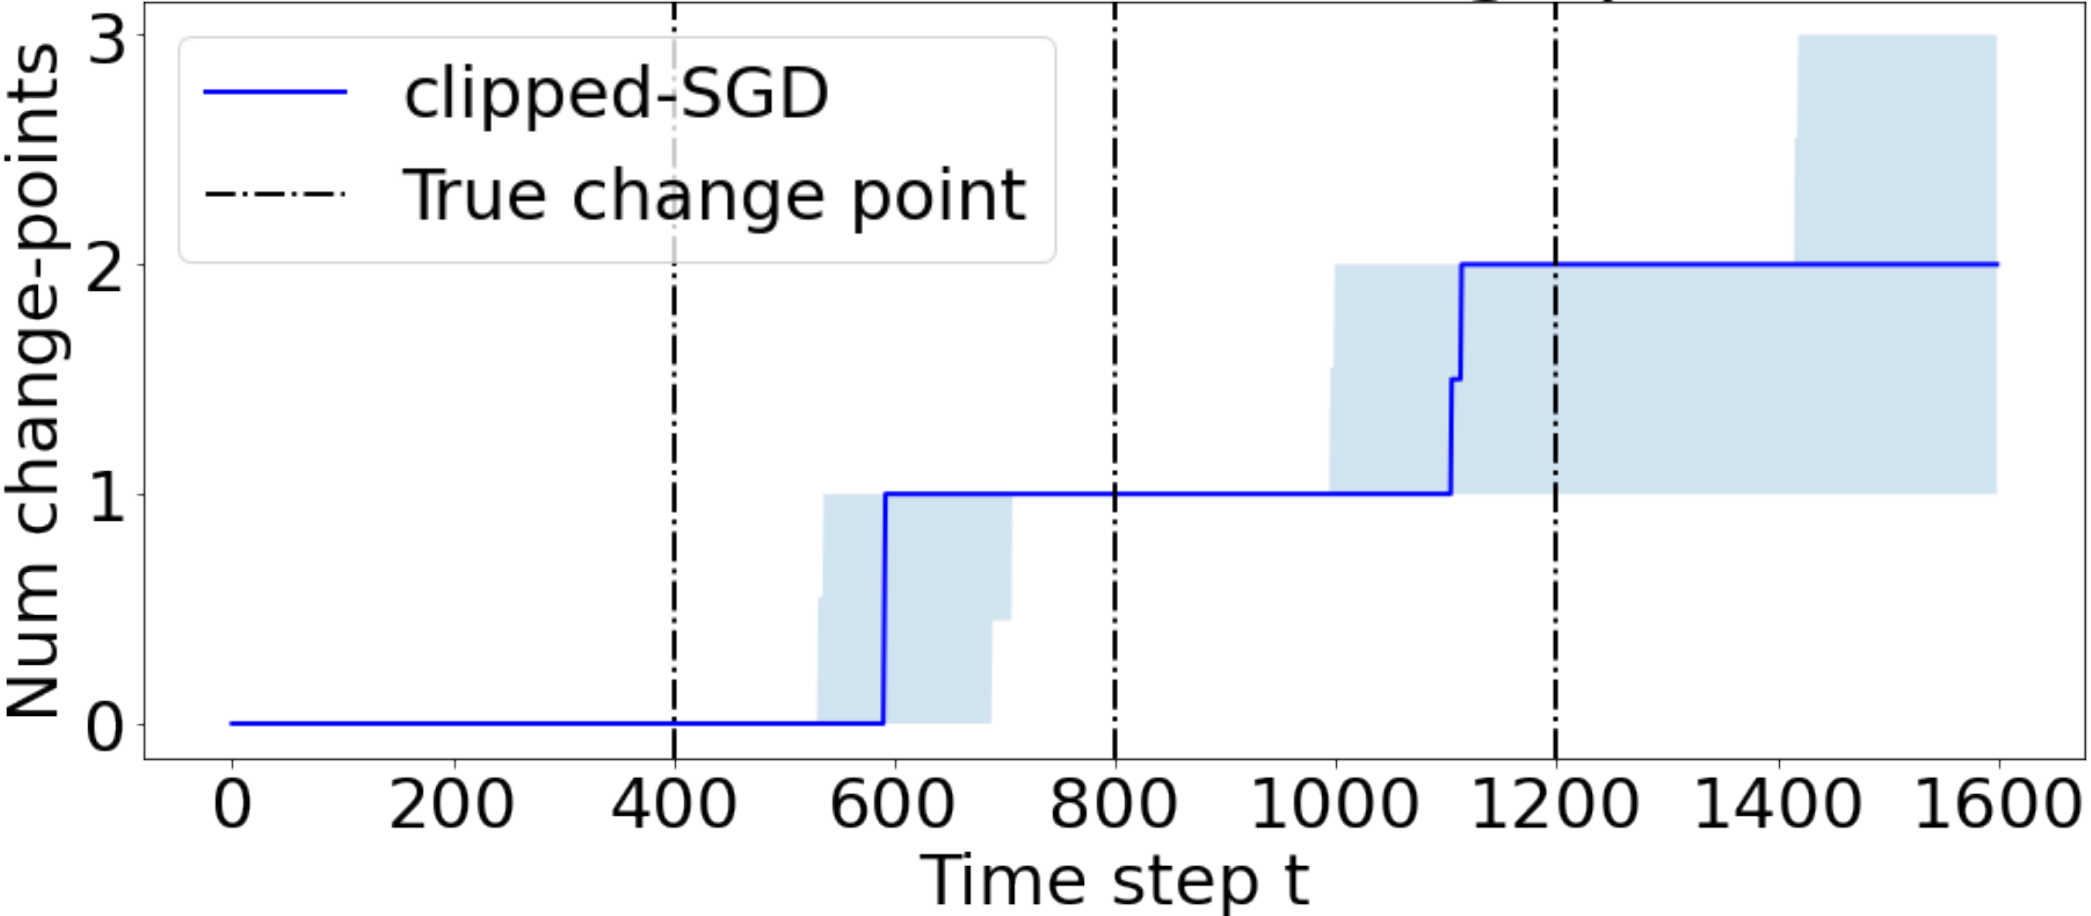

Supplement: supplementary_material [file attachment]

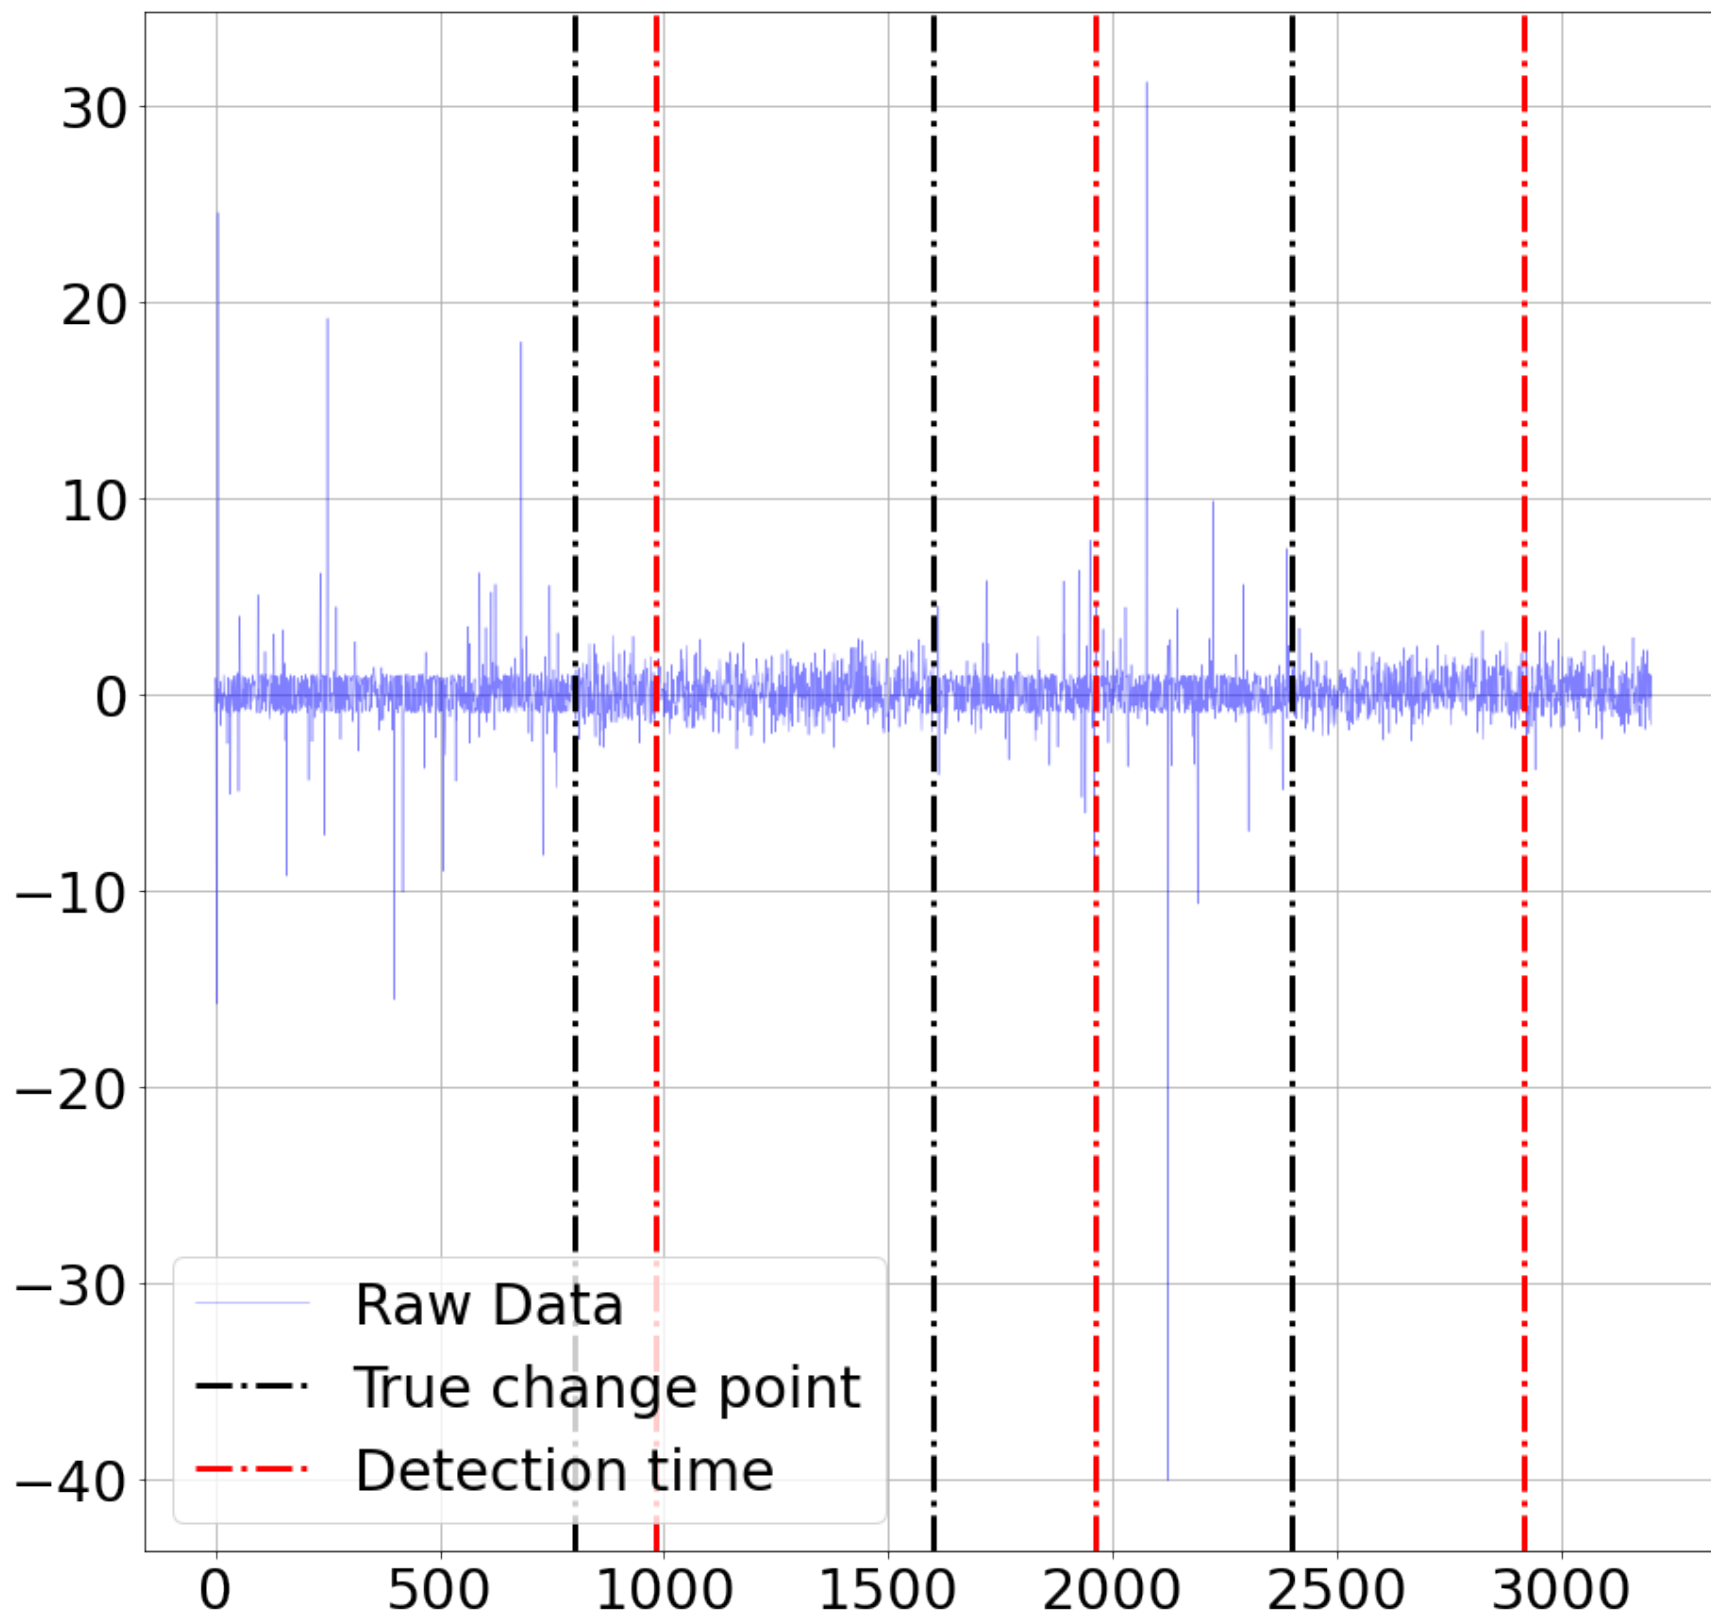

Supplement: supplementary_material [file attachment]

# Location of detected change-points

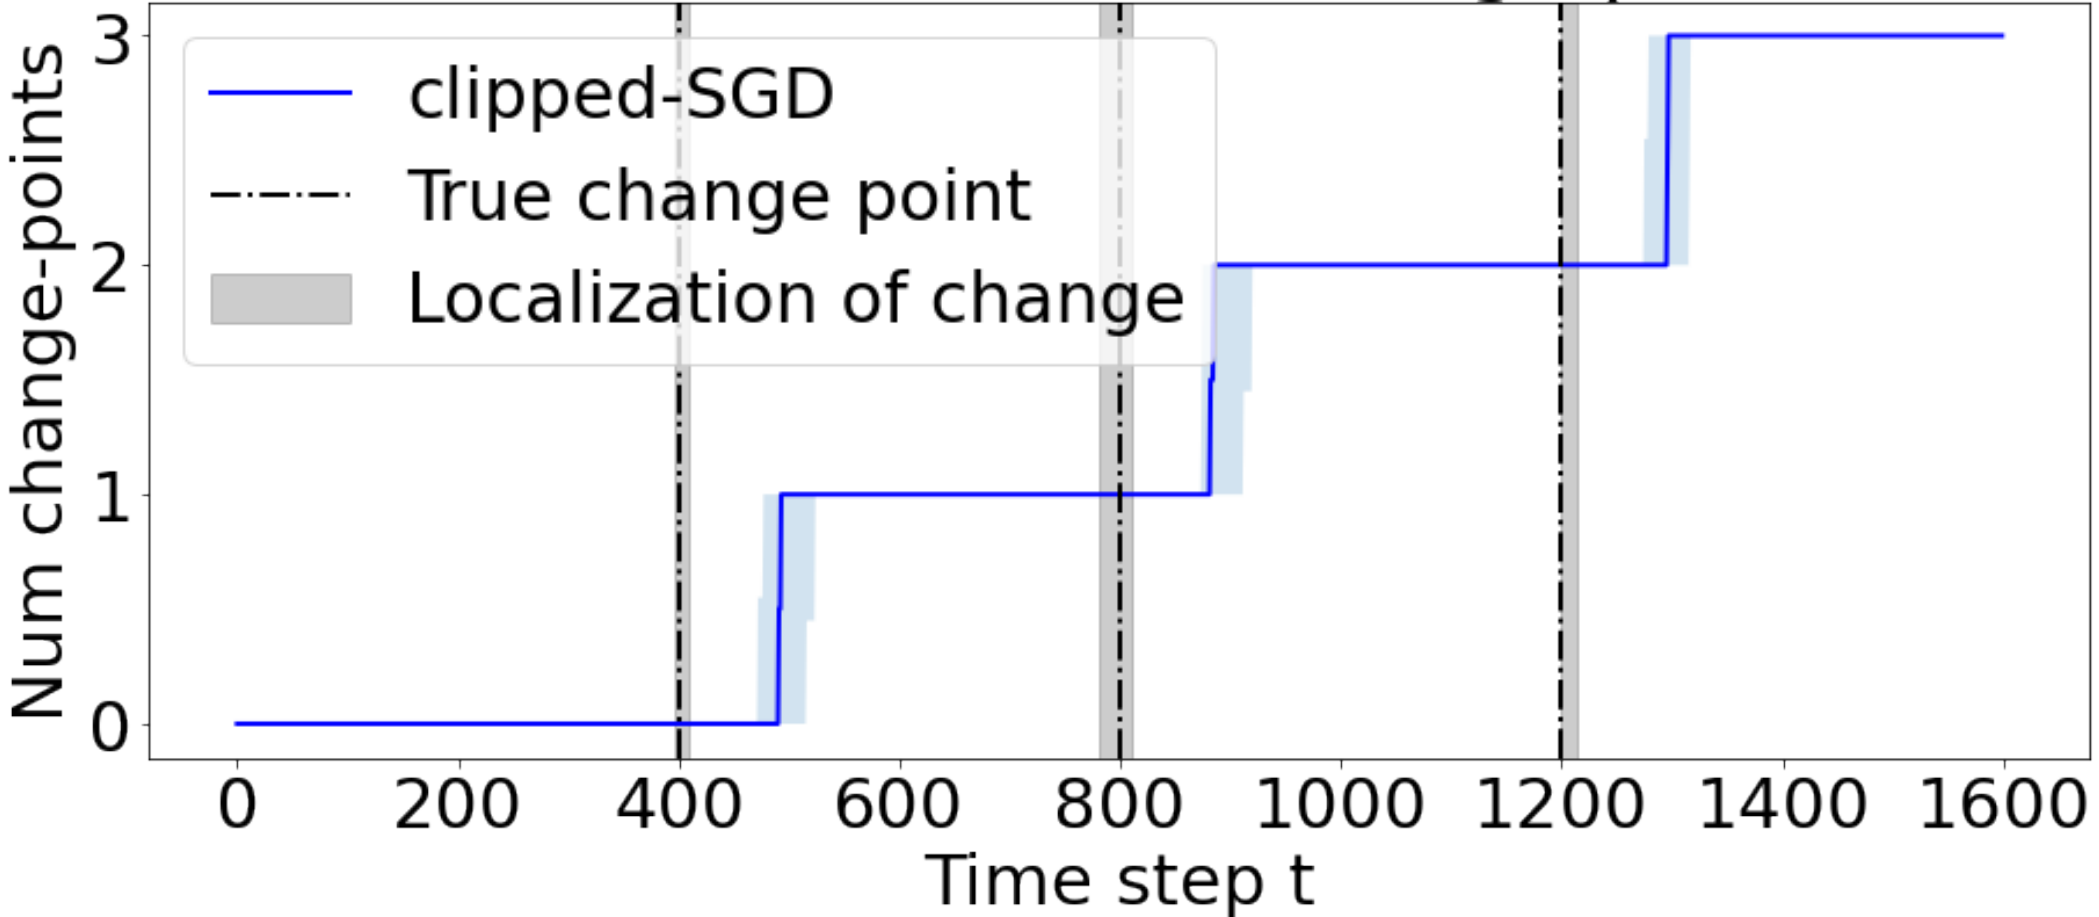

Supplement: supplementary_material [file attachment]

Location of detected change-points

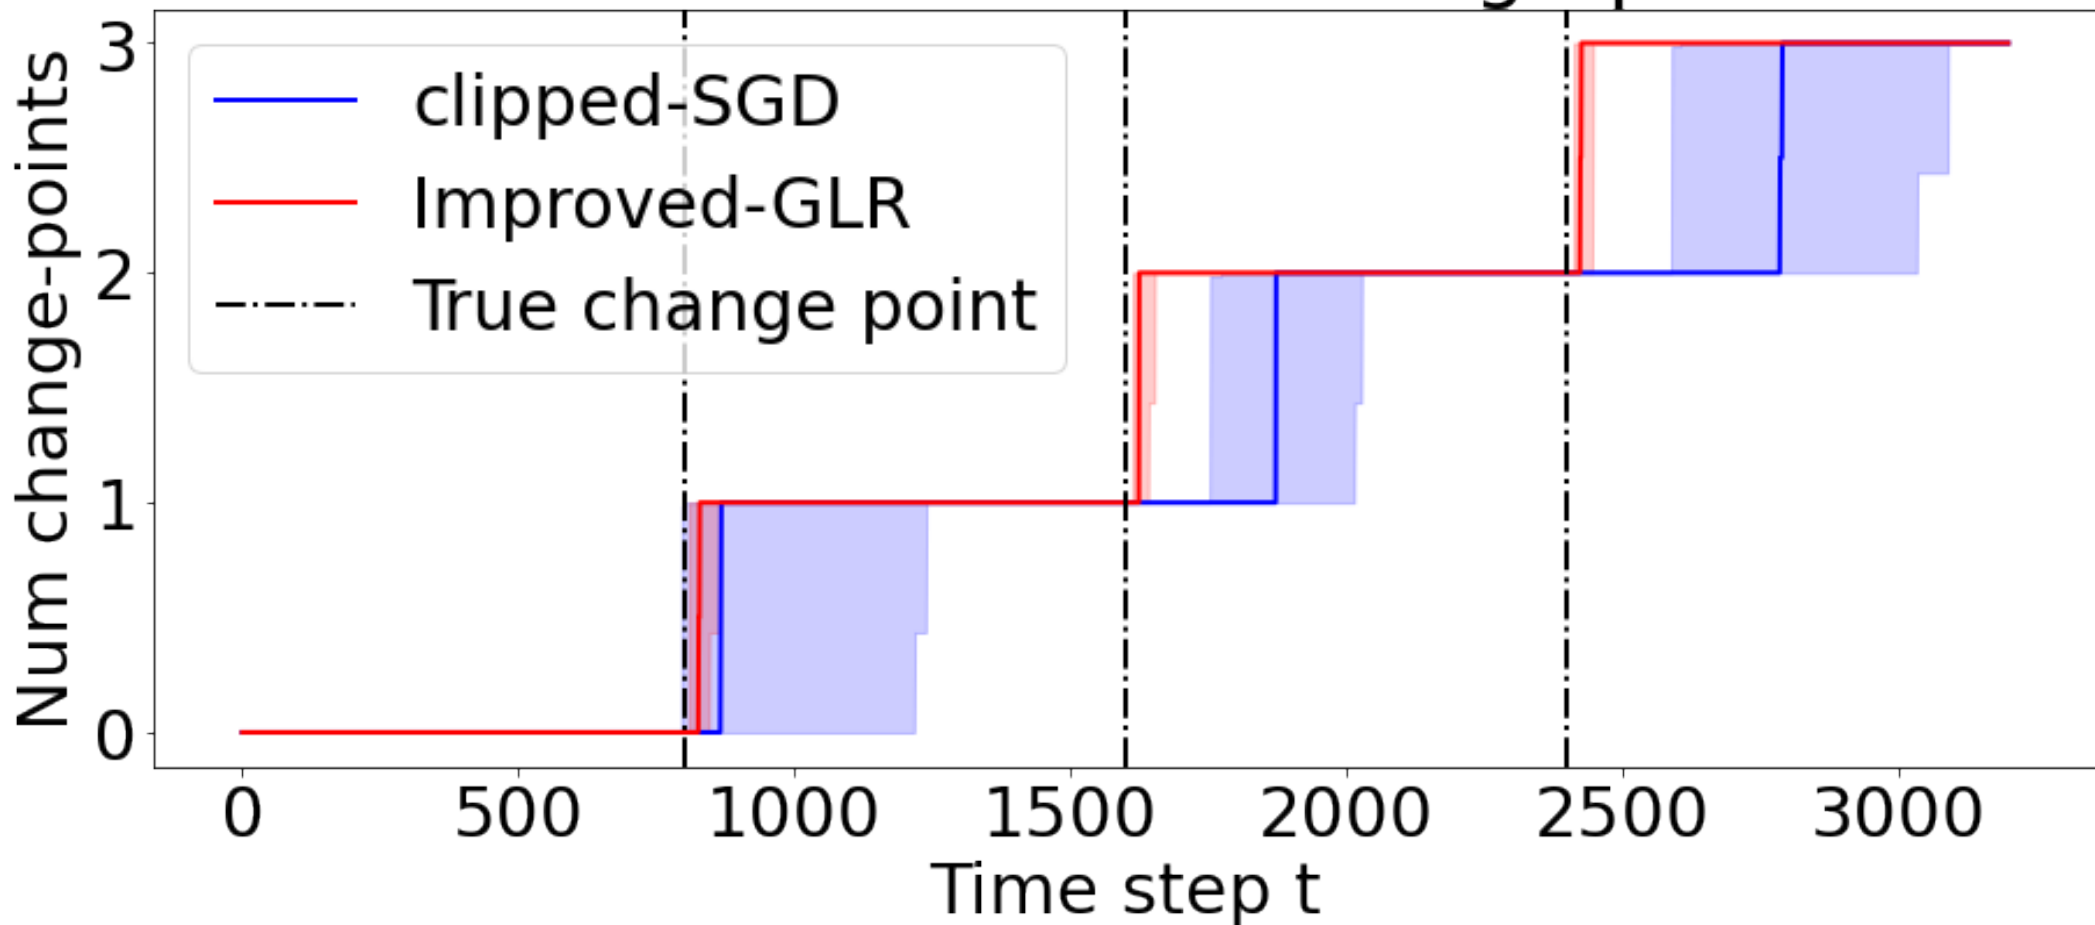

Supplement: supplementary_material [file attachment]

Location of detected change-points

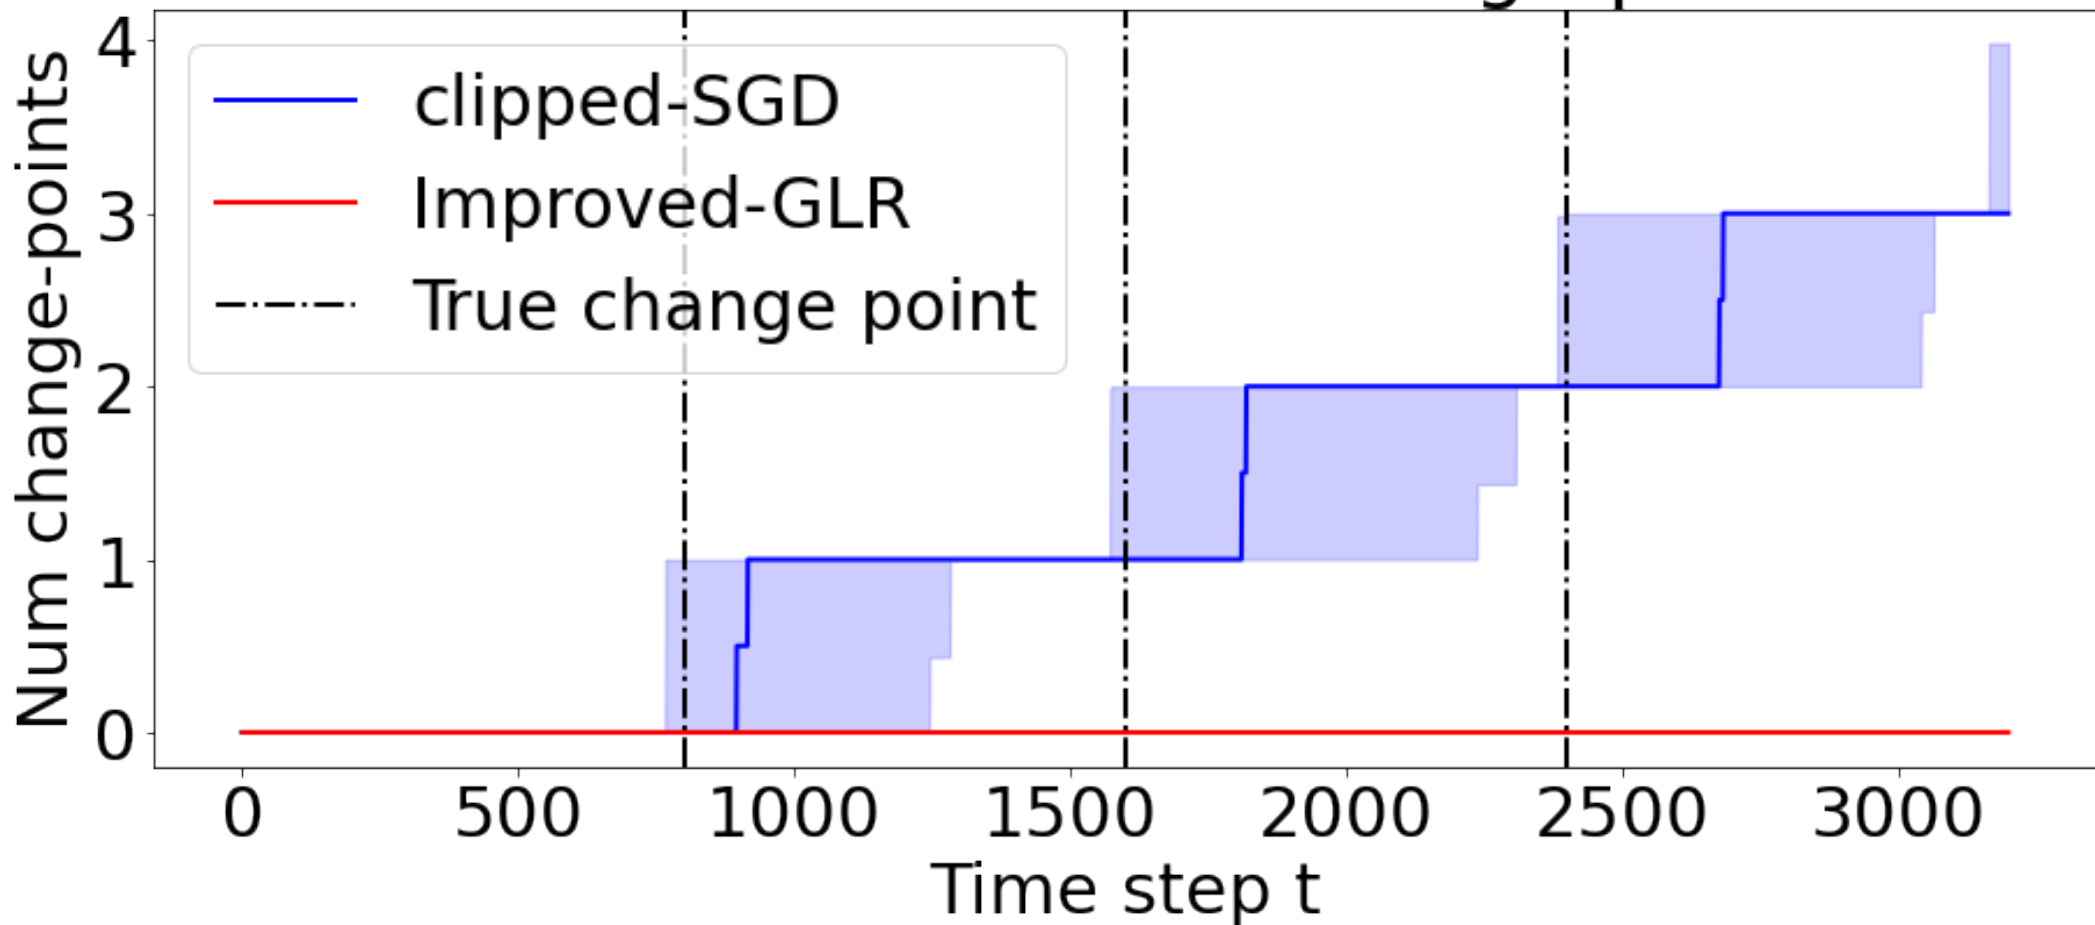

Supplement: supplementary_material [file attachment]

# Location of detected change-points

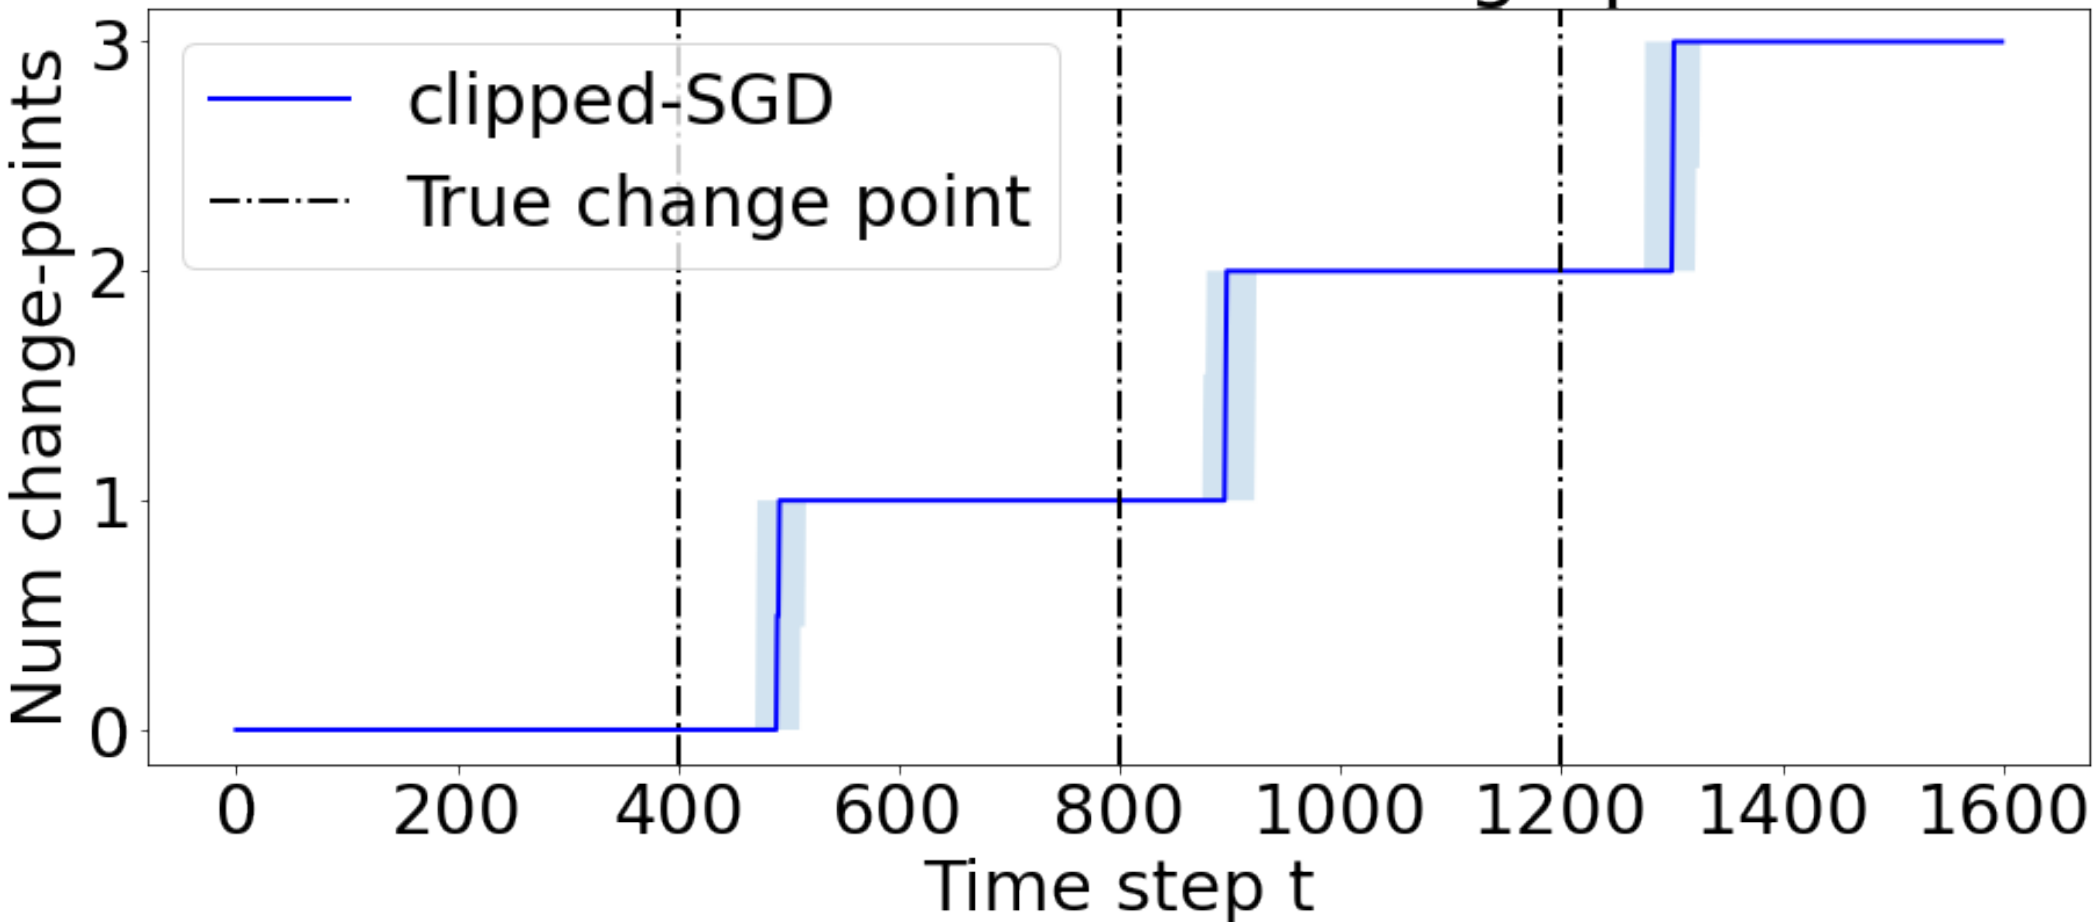

Supplement: supplementary_material [file attachment]

# Location of detected change-points

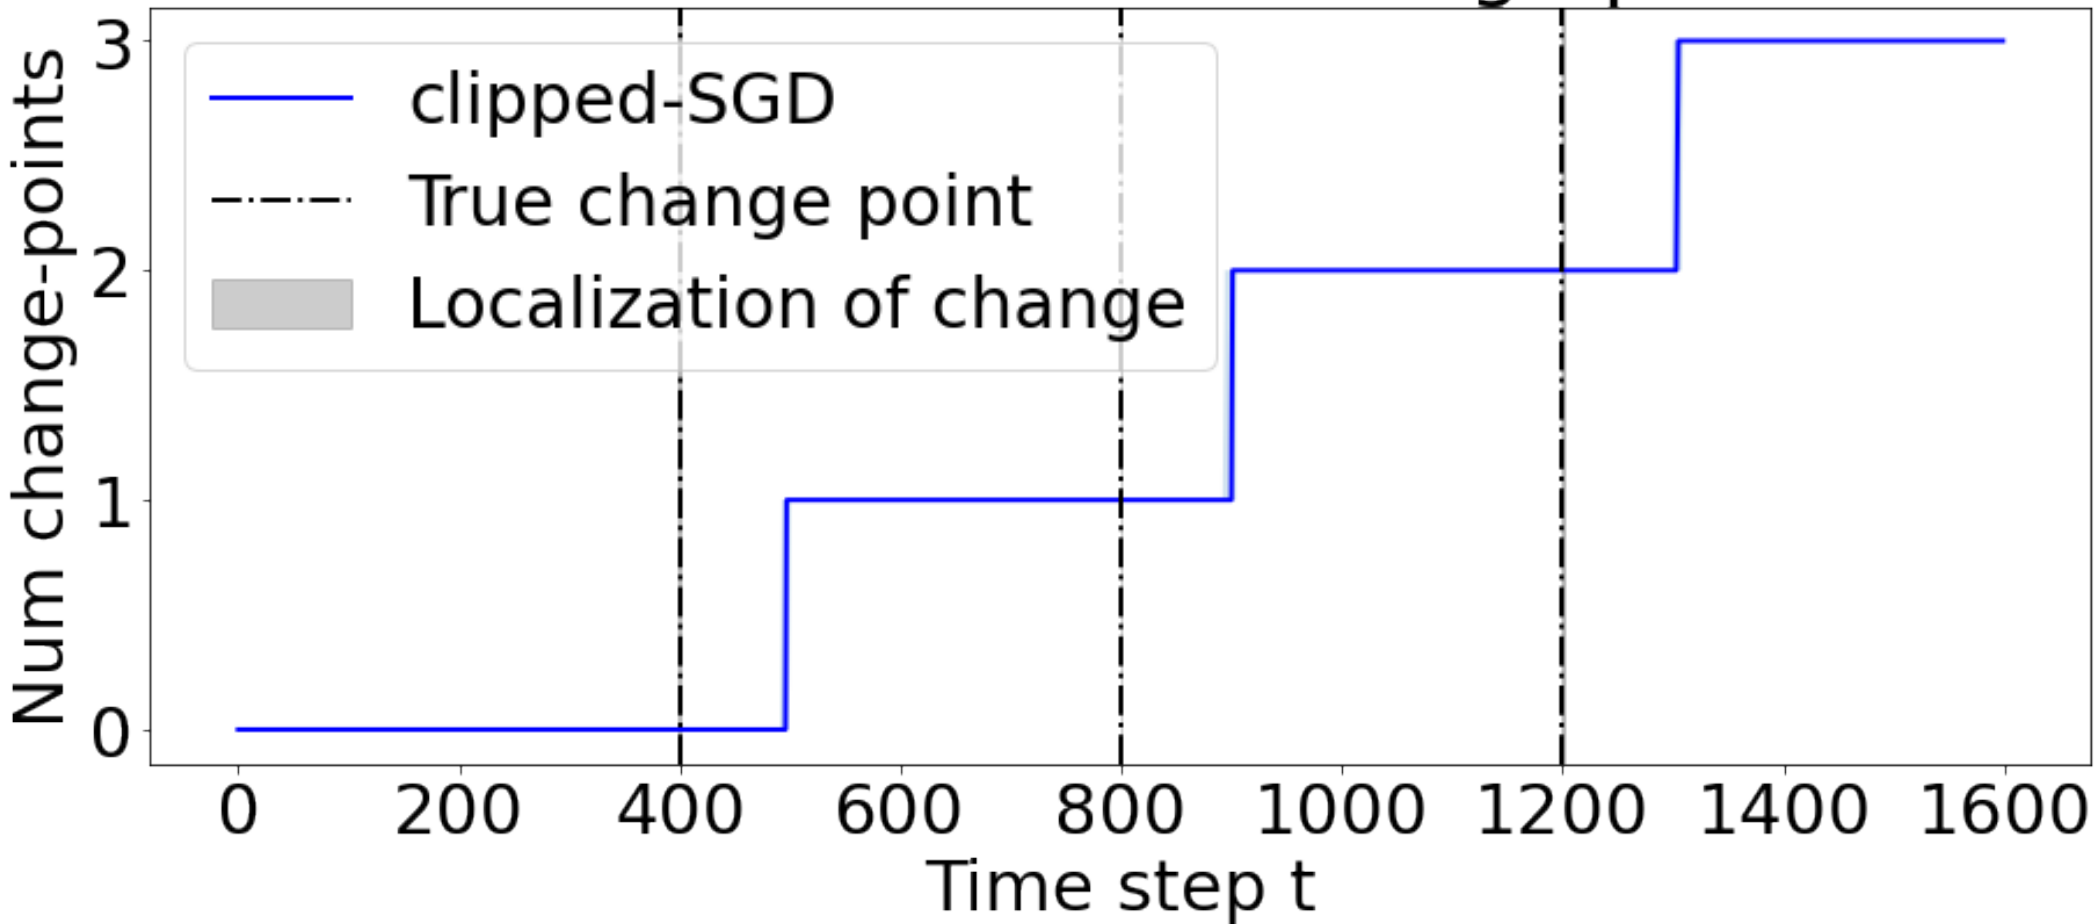

Supplement: supplementary_material [file attachment]

Location of detected change-points

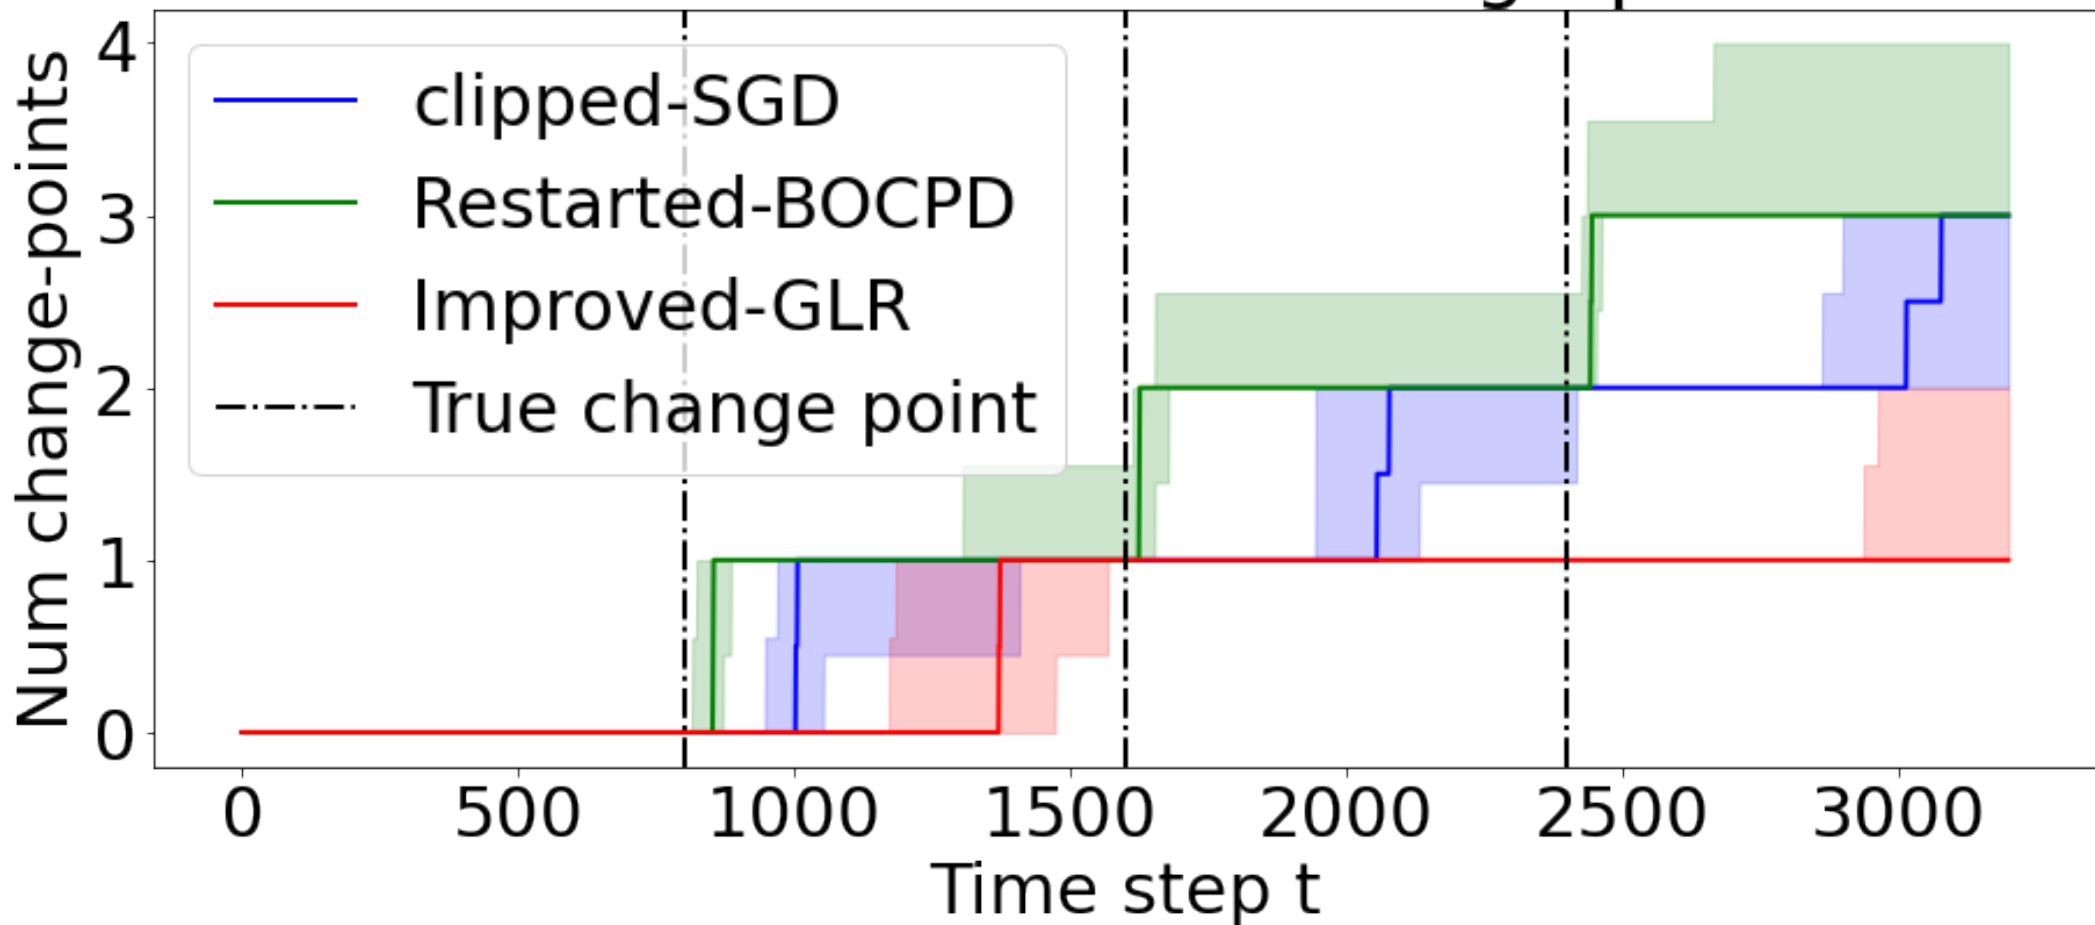

Supplement: supplementary_material [file attachment]

# Location of detected change-points

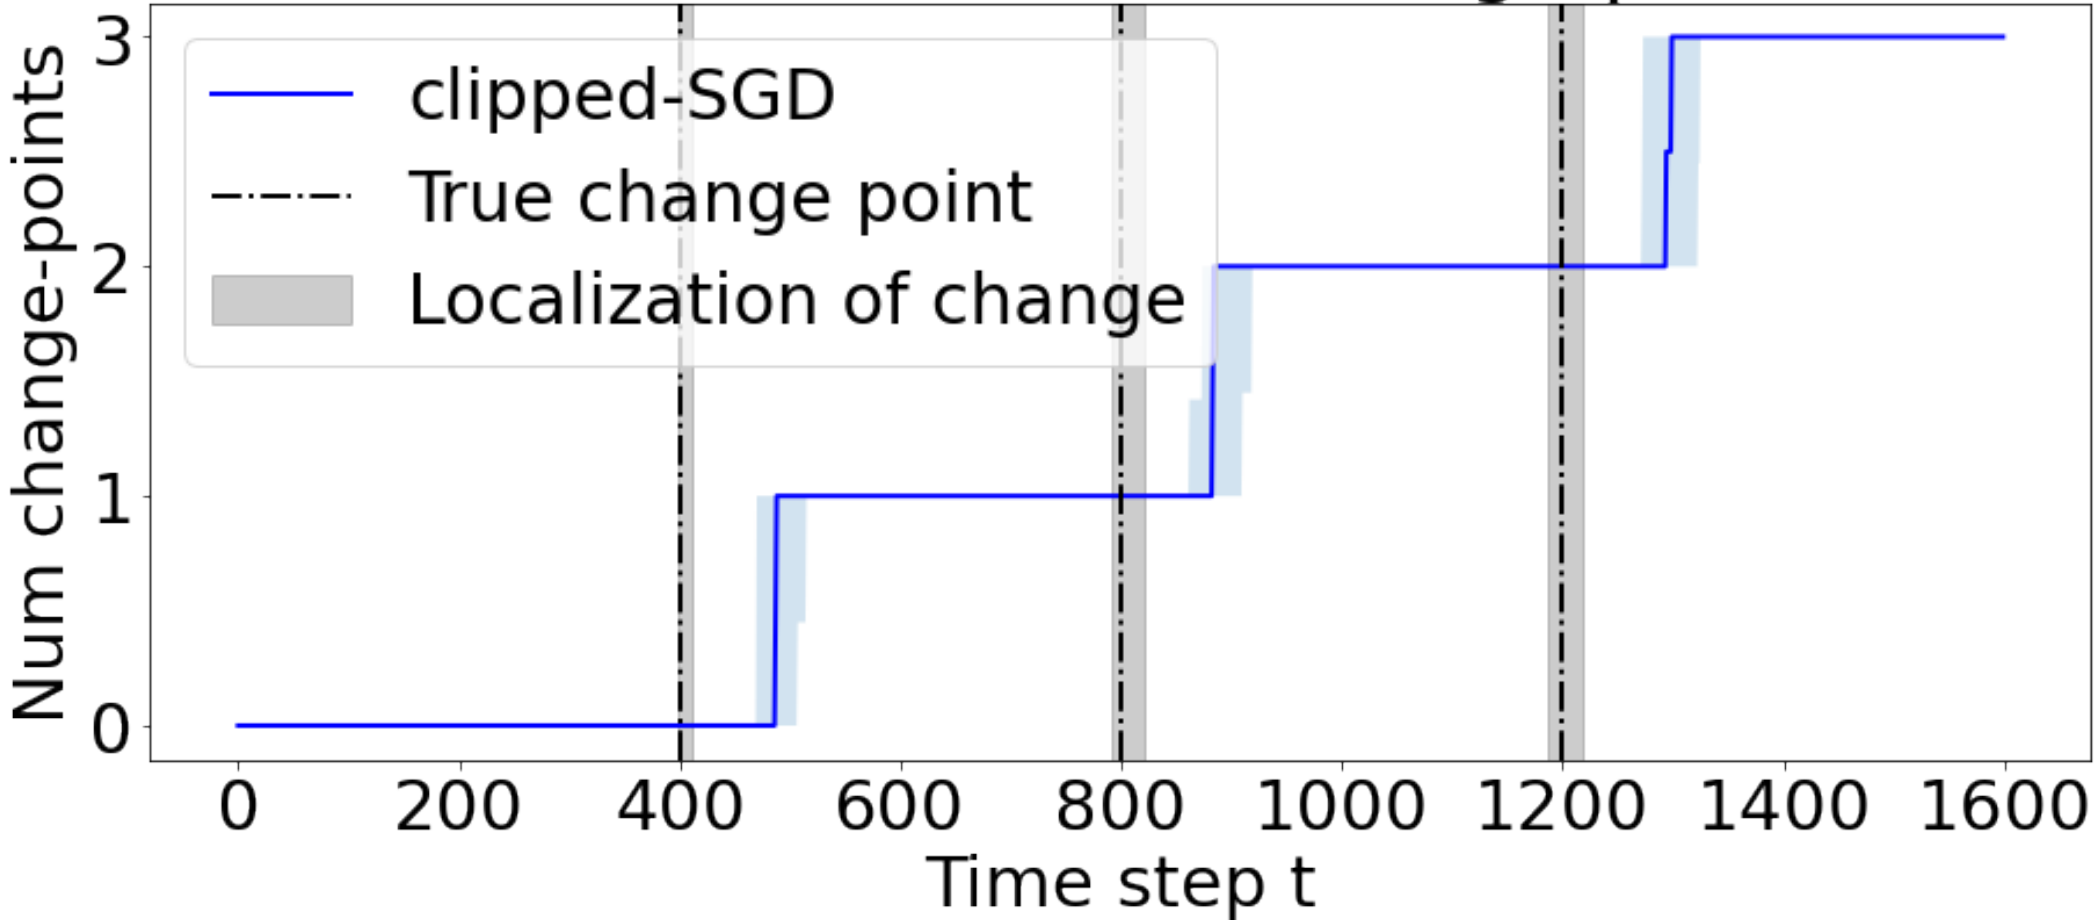

Supplement: supplementary_material [file attachment]

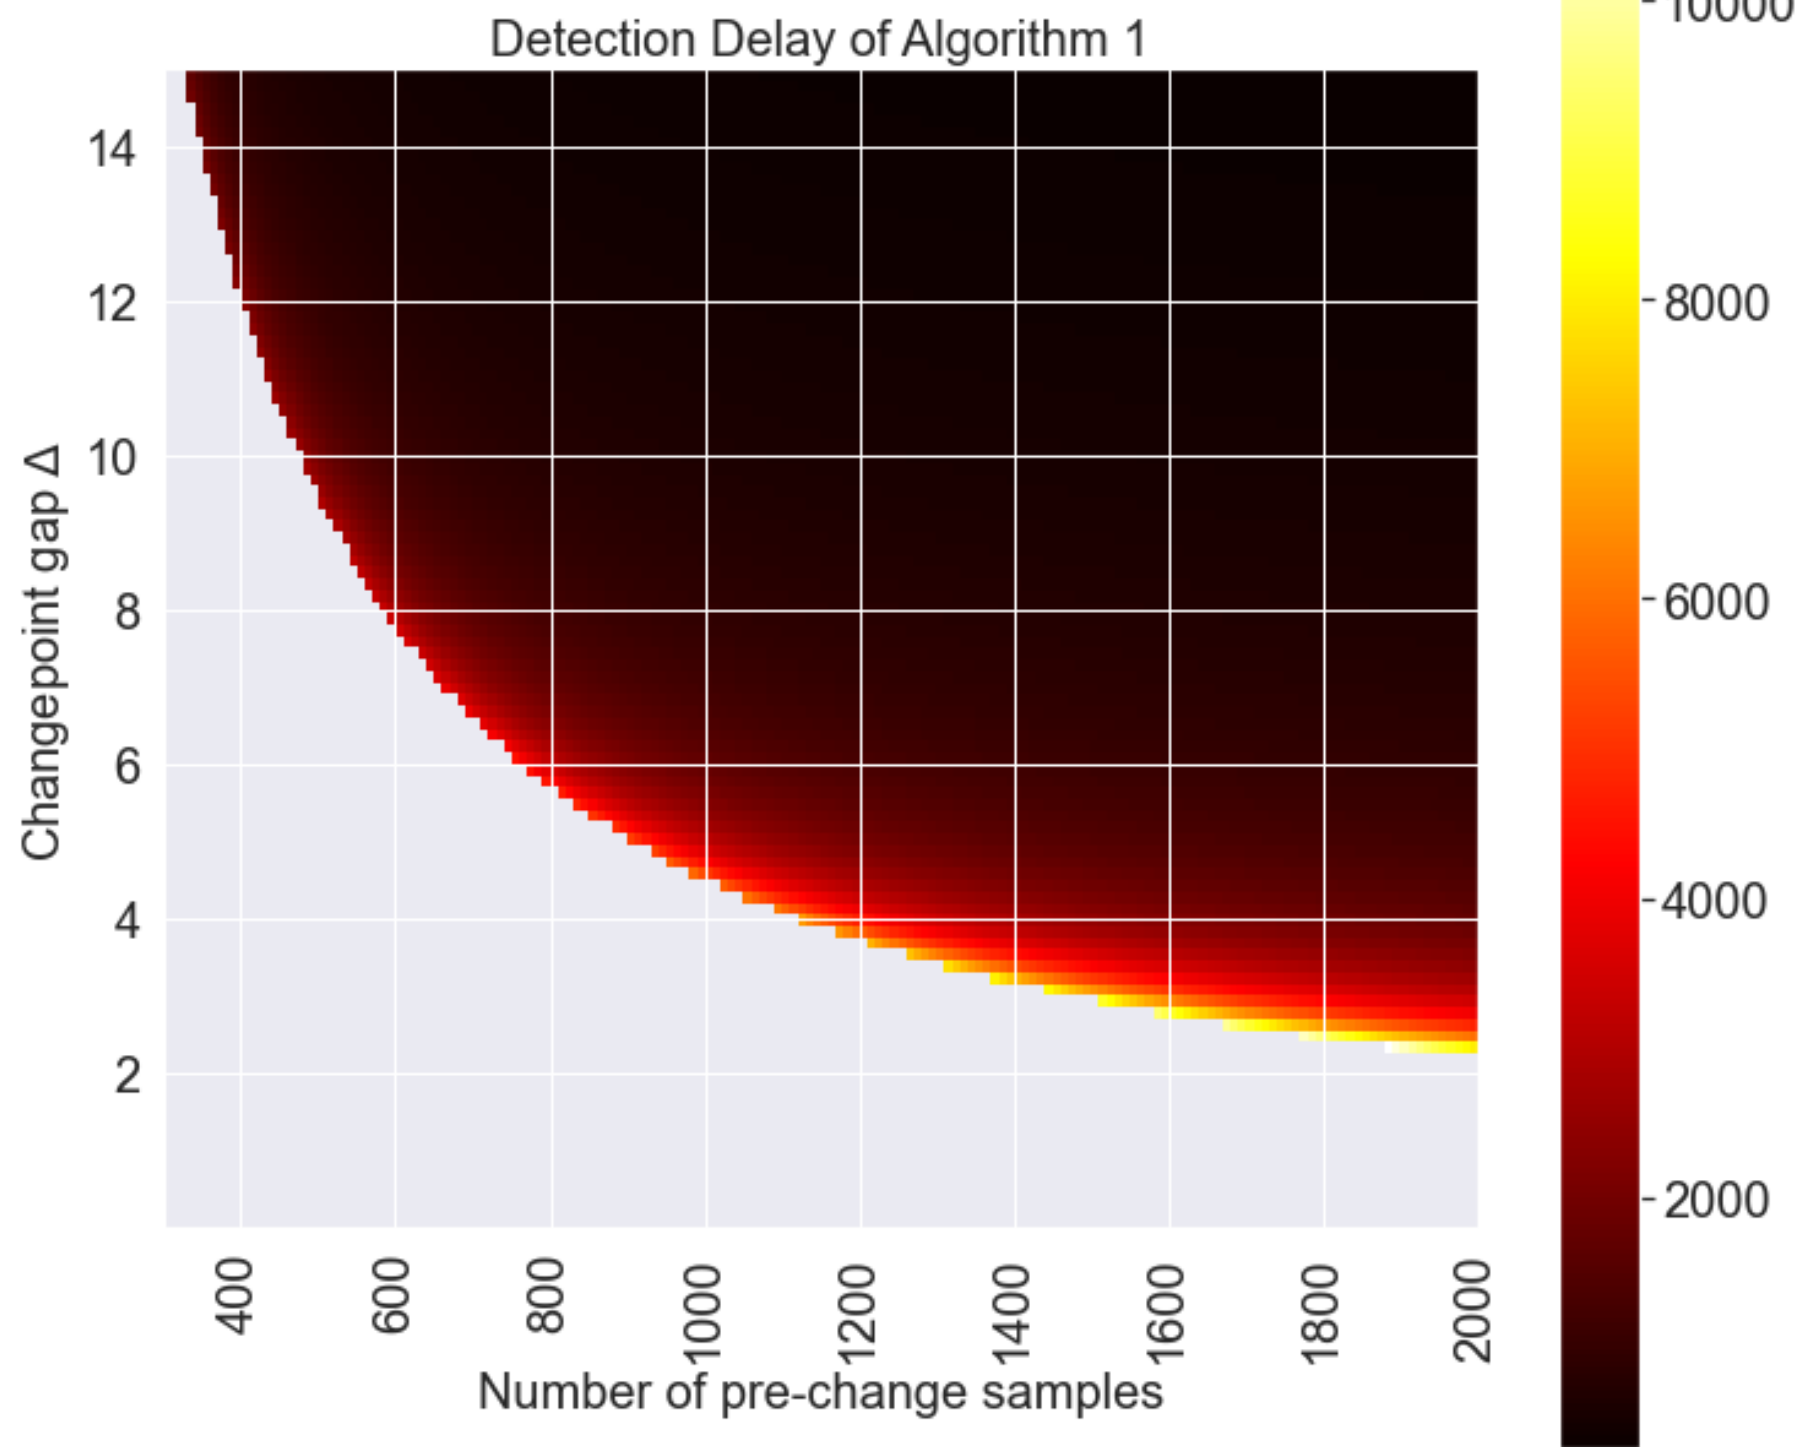

Supplement: supplementary_material [file attachment]

# Location of detected change-points

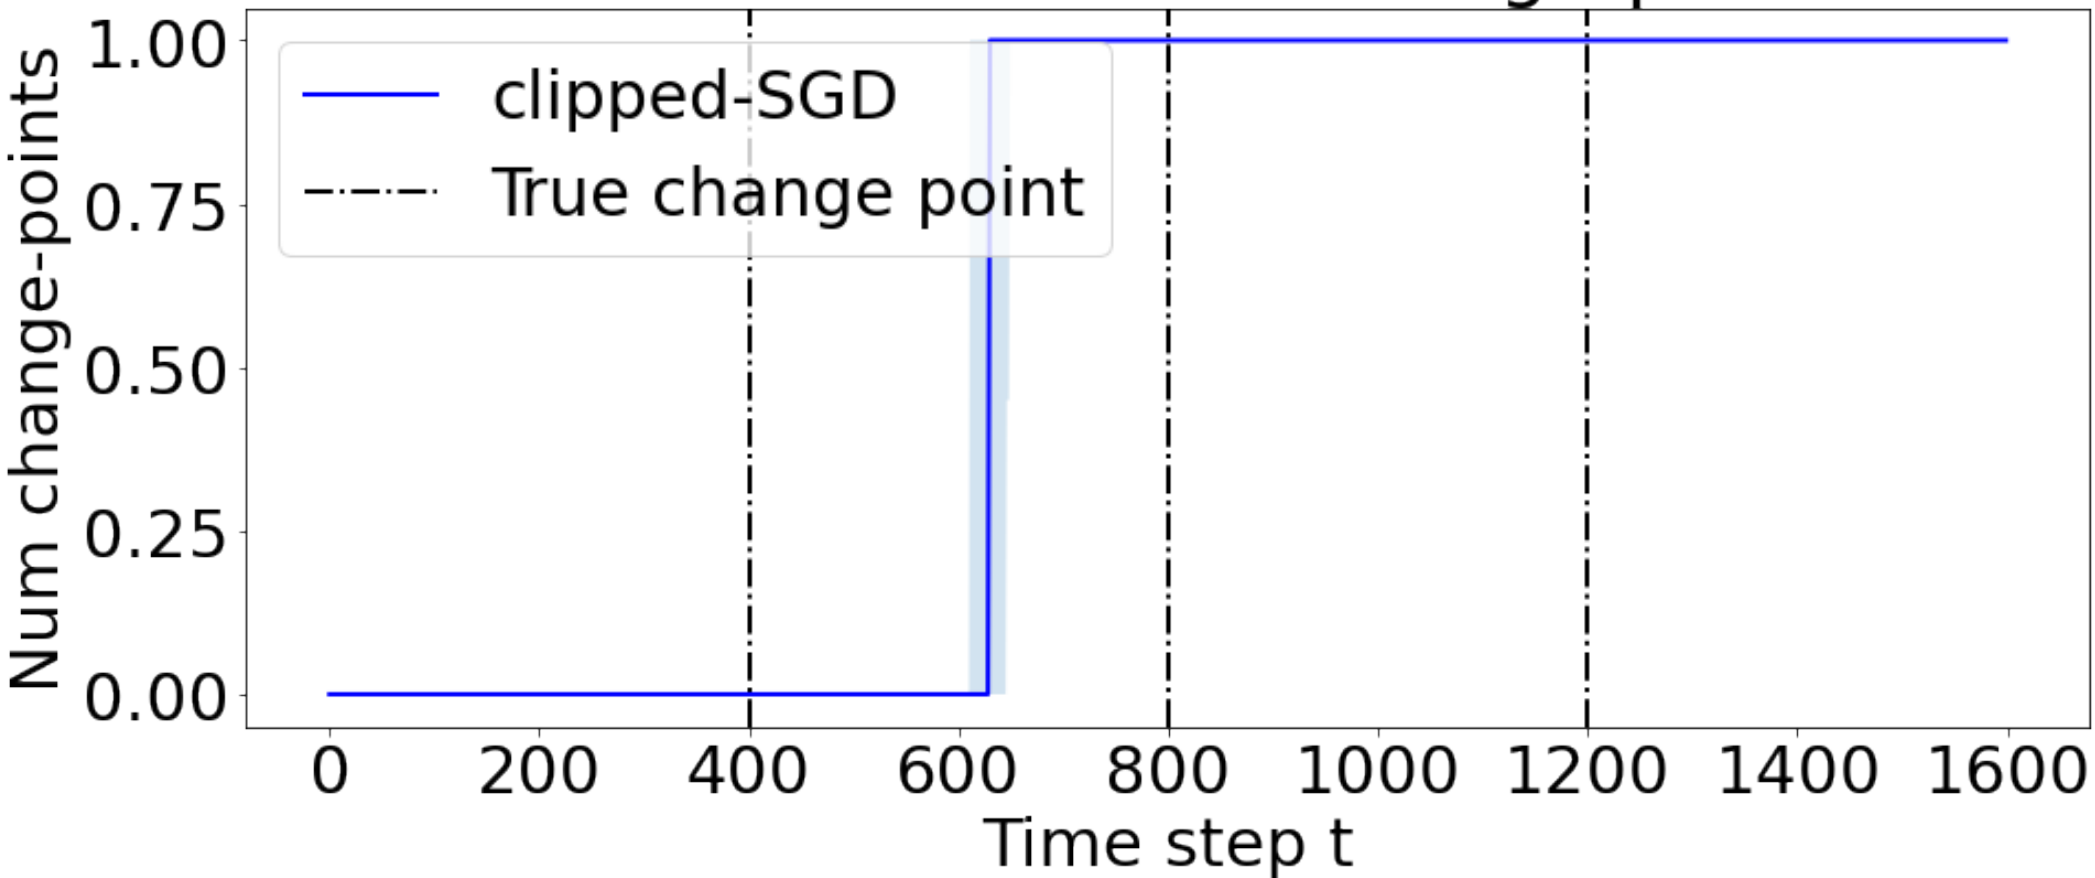

Supplement: supplementary_material [file attachment]

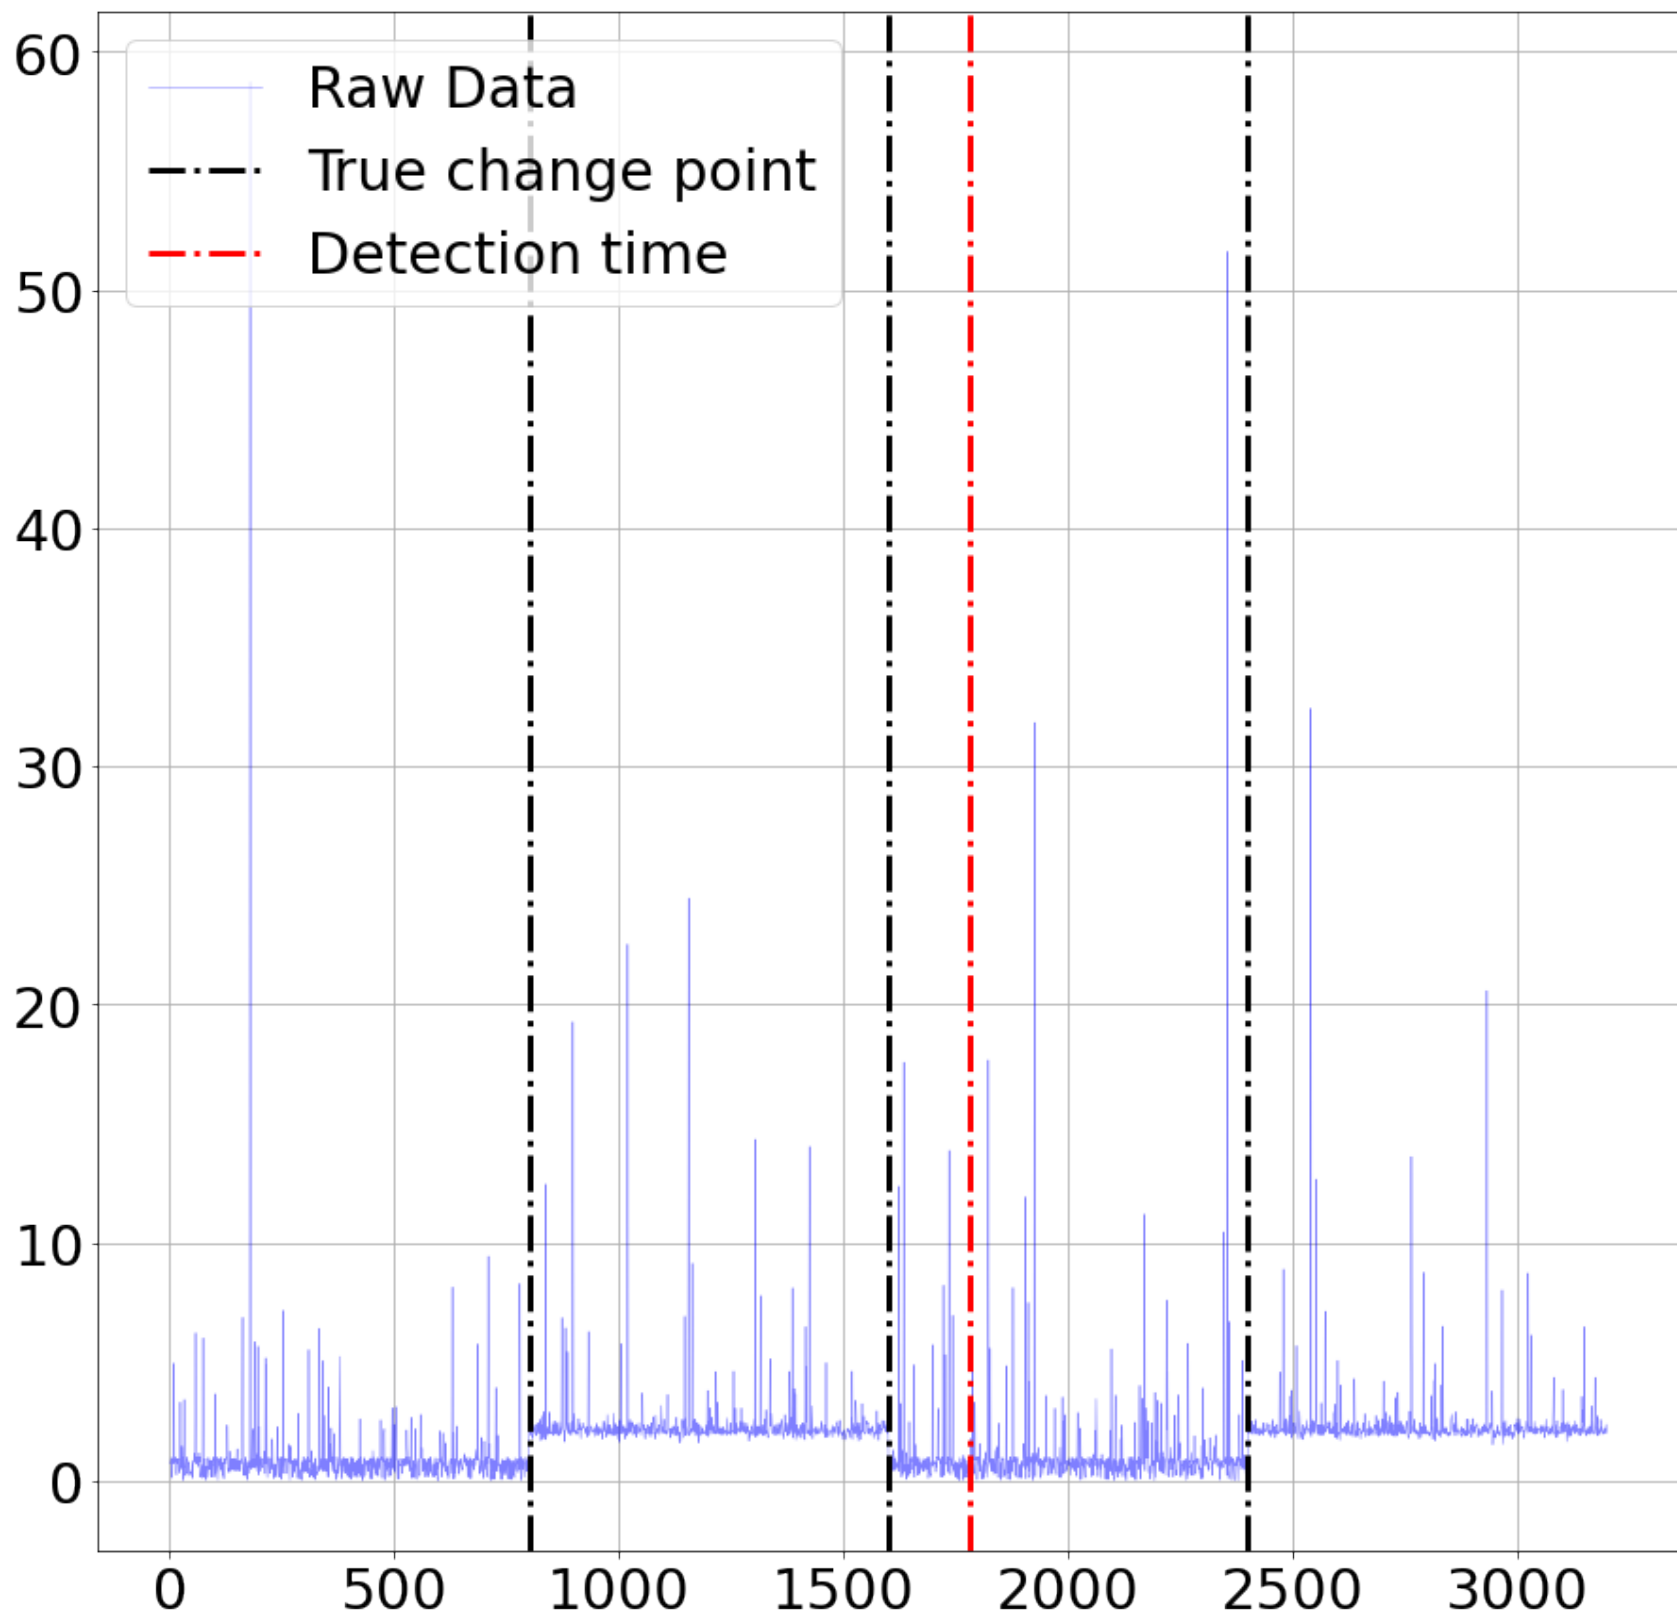

Supplement: supplementary_material [file attachment]

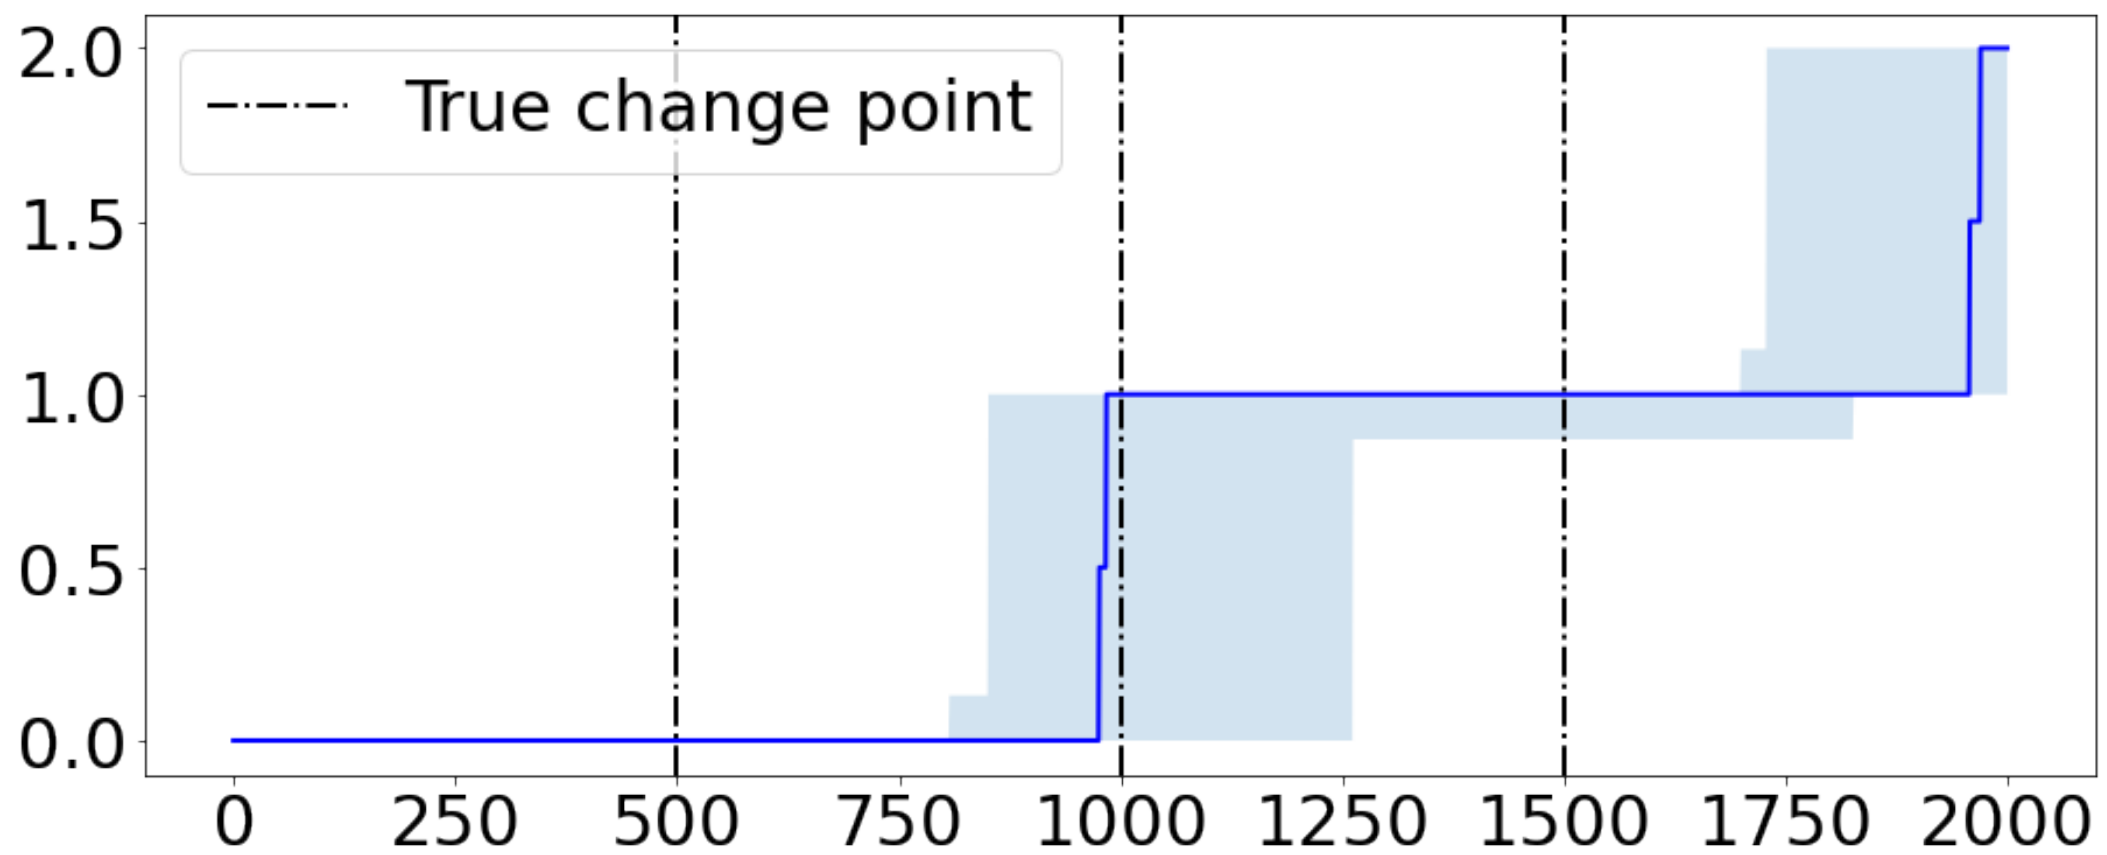

Supplement: supplementary_material [file attachment]

Location of detected change-points

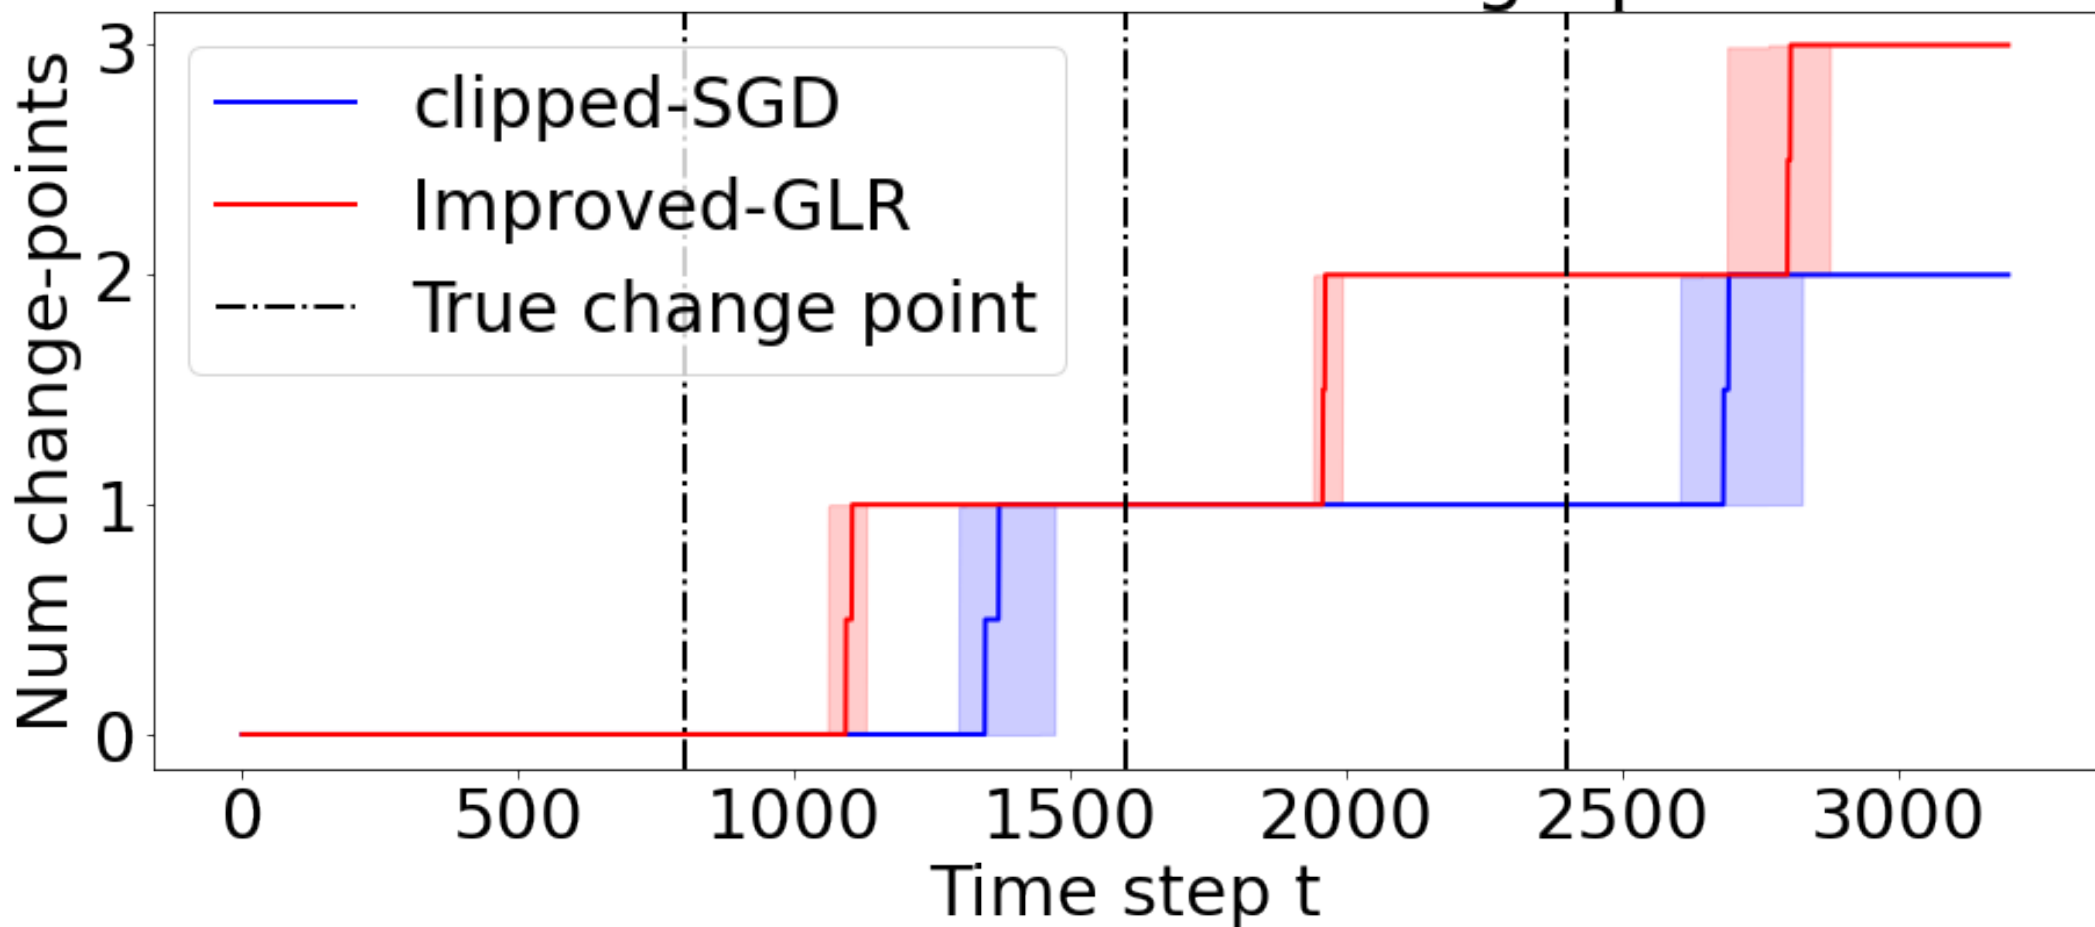

Supplement: supplementary_material [file attachment]

Location of detected change-points

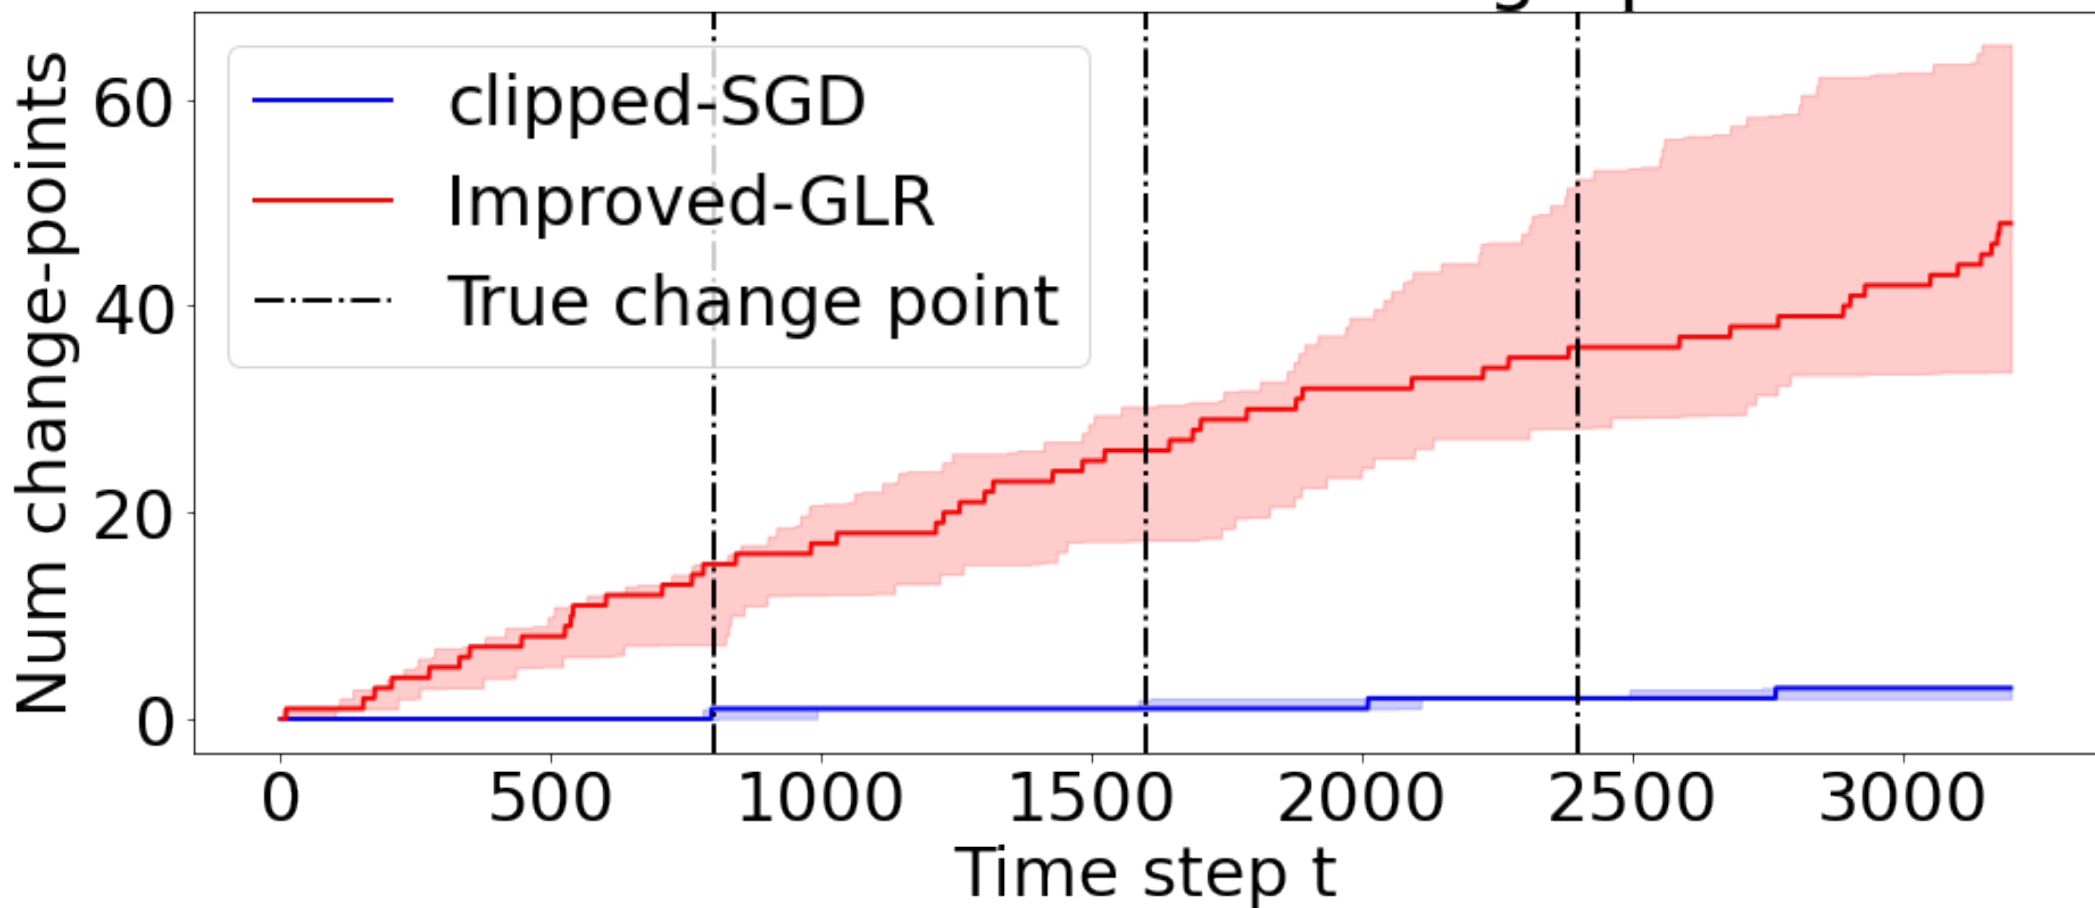

Supplement: supplementary_material [file attachment]

Location of detected change-points

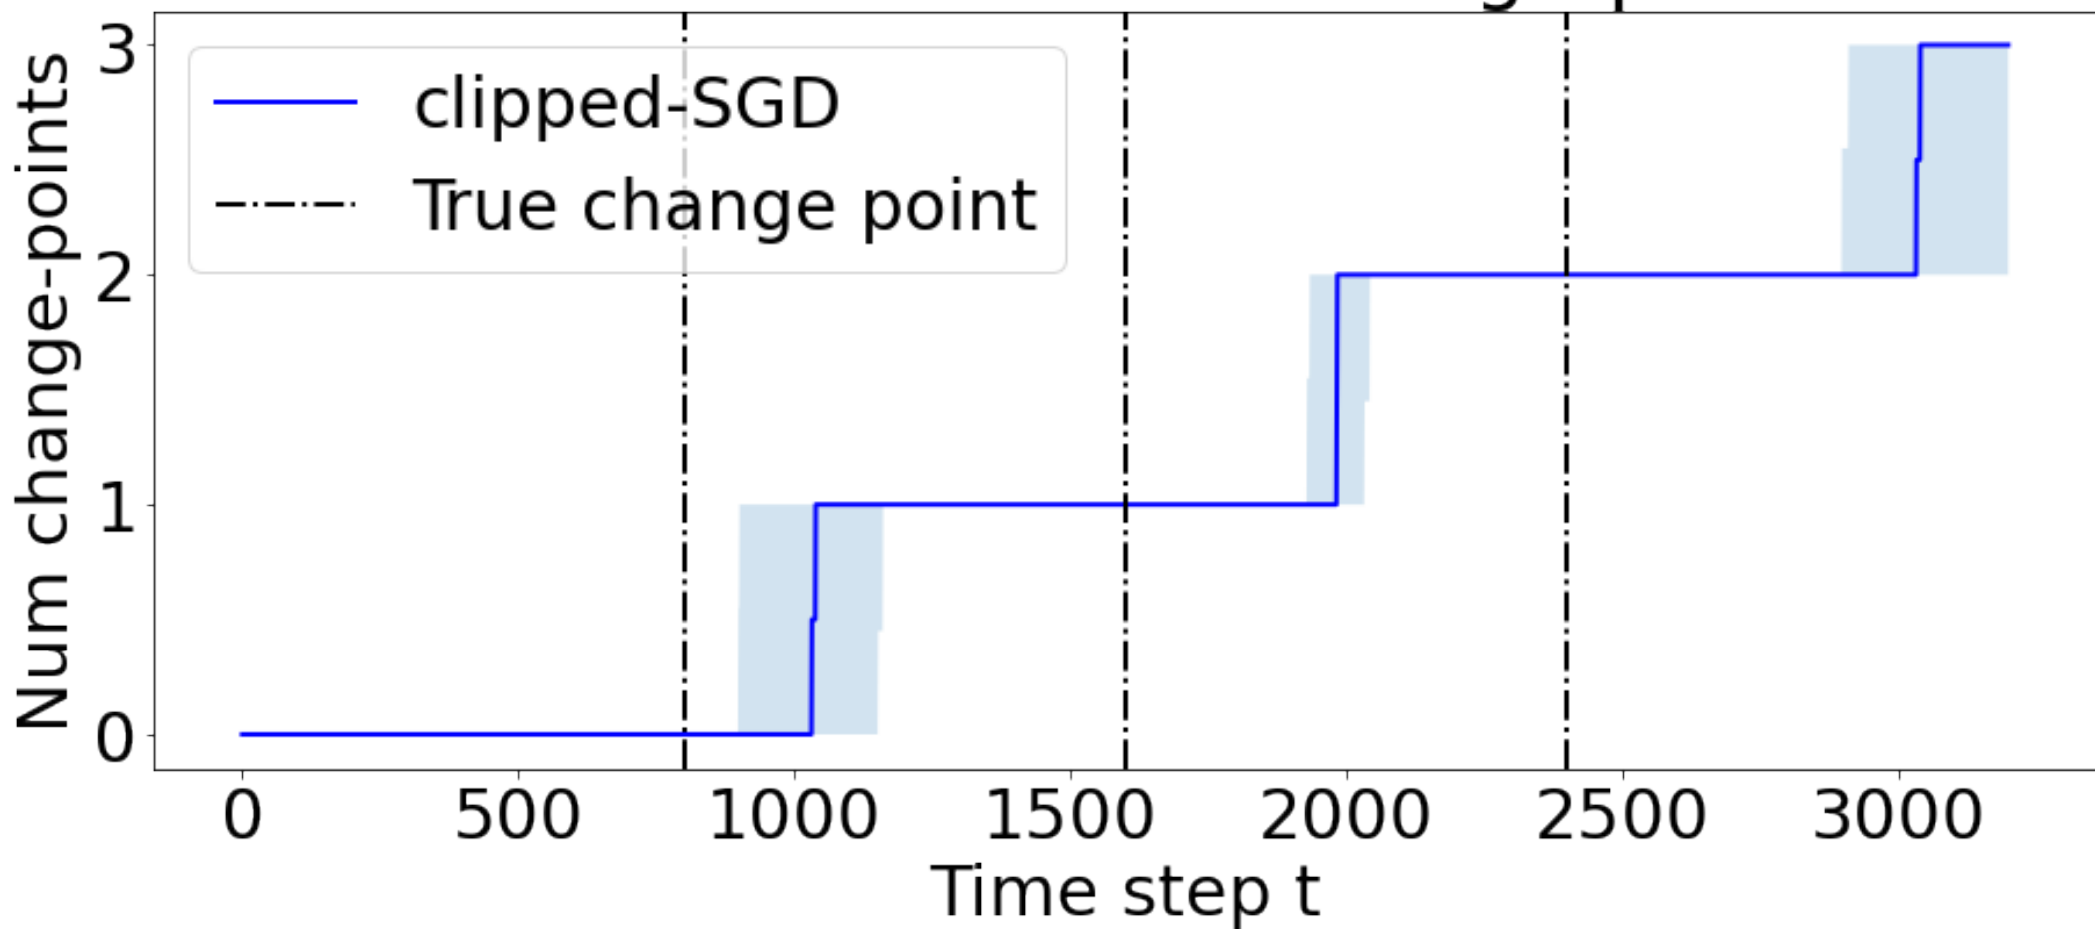

Supplement: supplementary_material [file attachment]

# Location of detected change-points

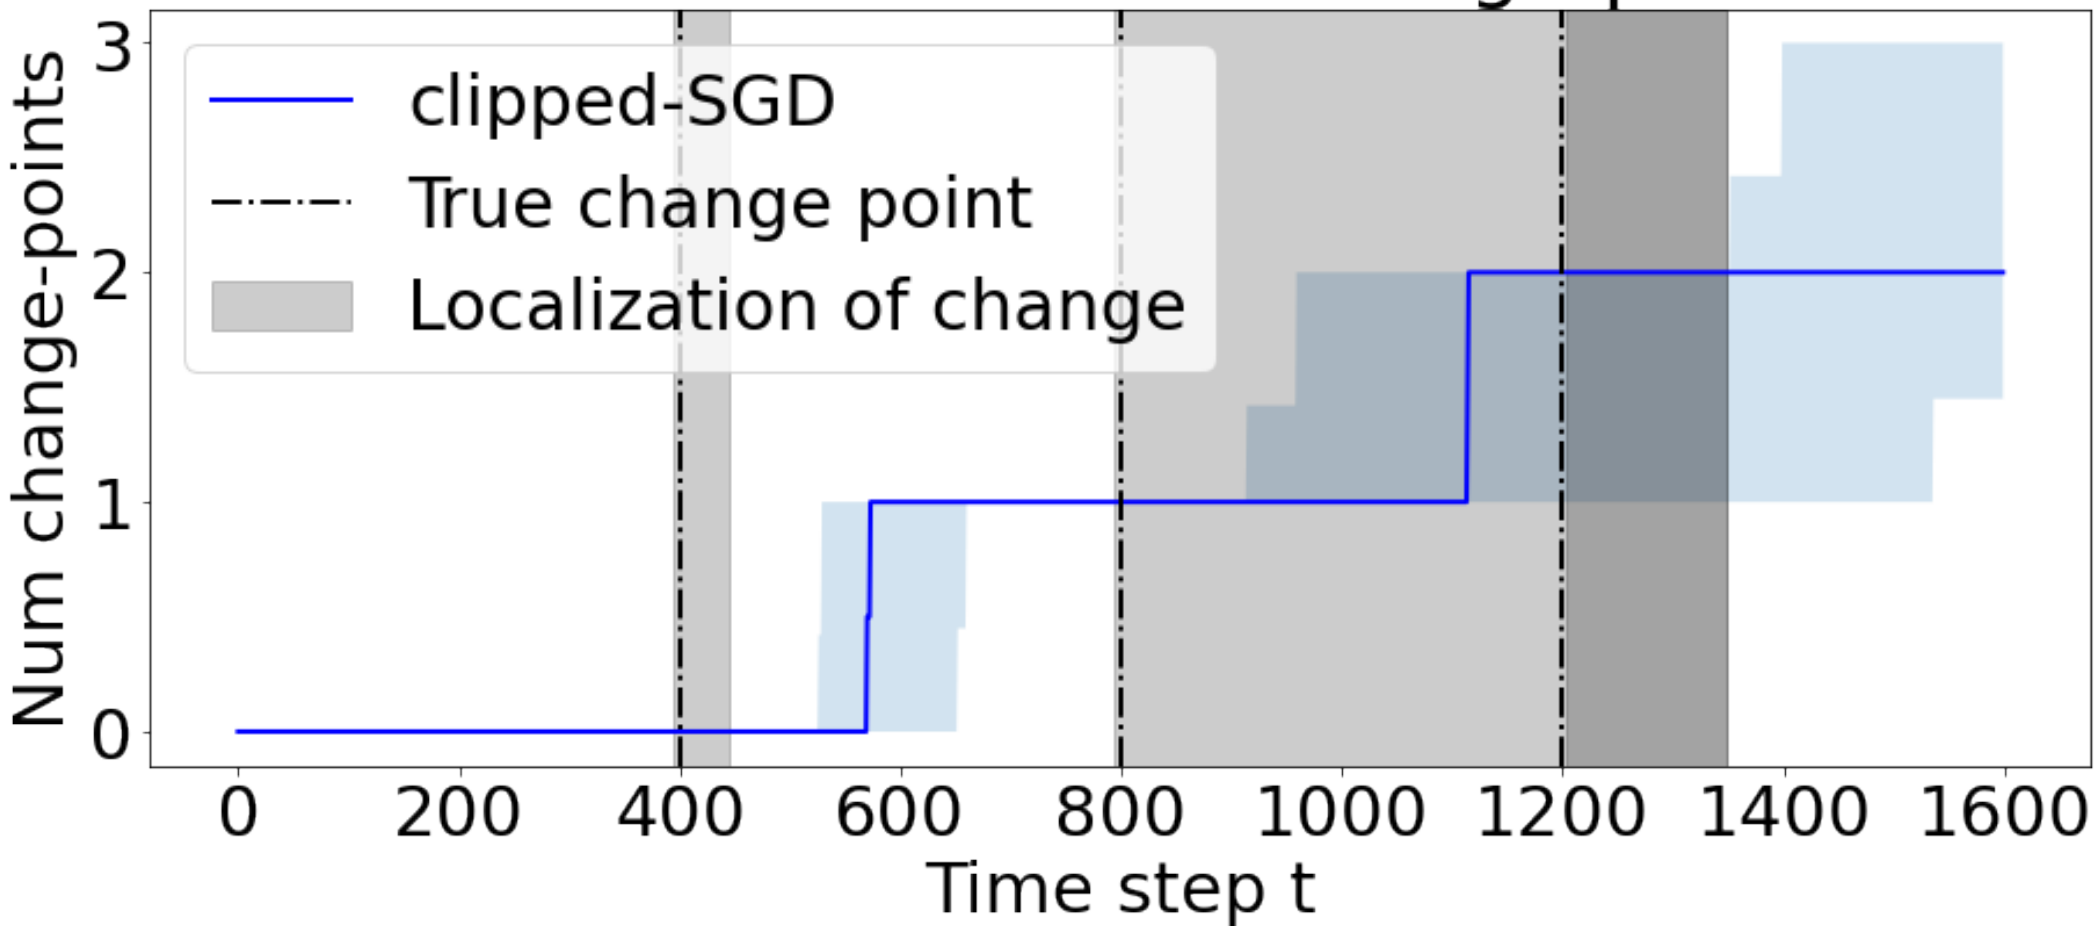

Supplement: supplementary_material [file attachment]

# Location of detected change-points

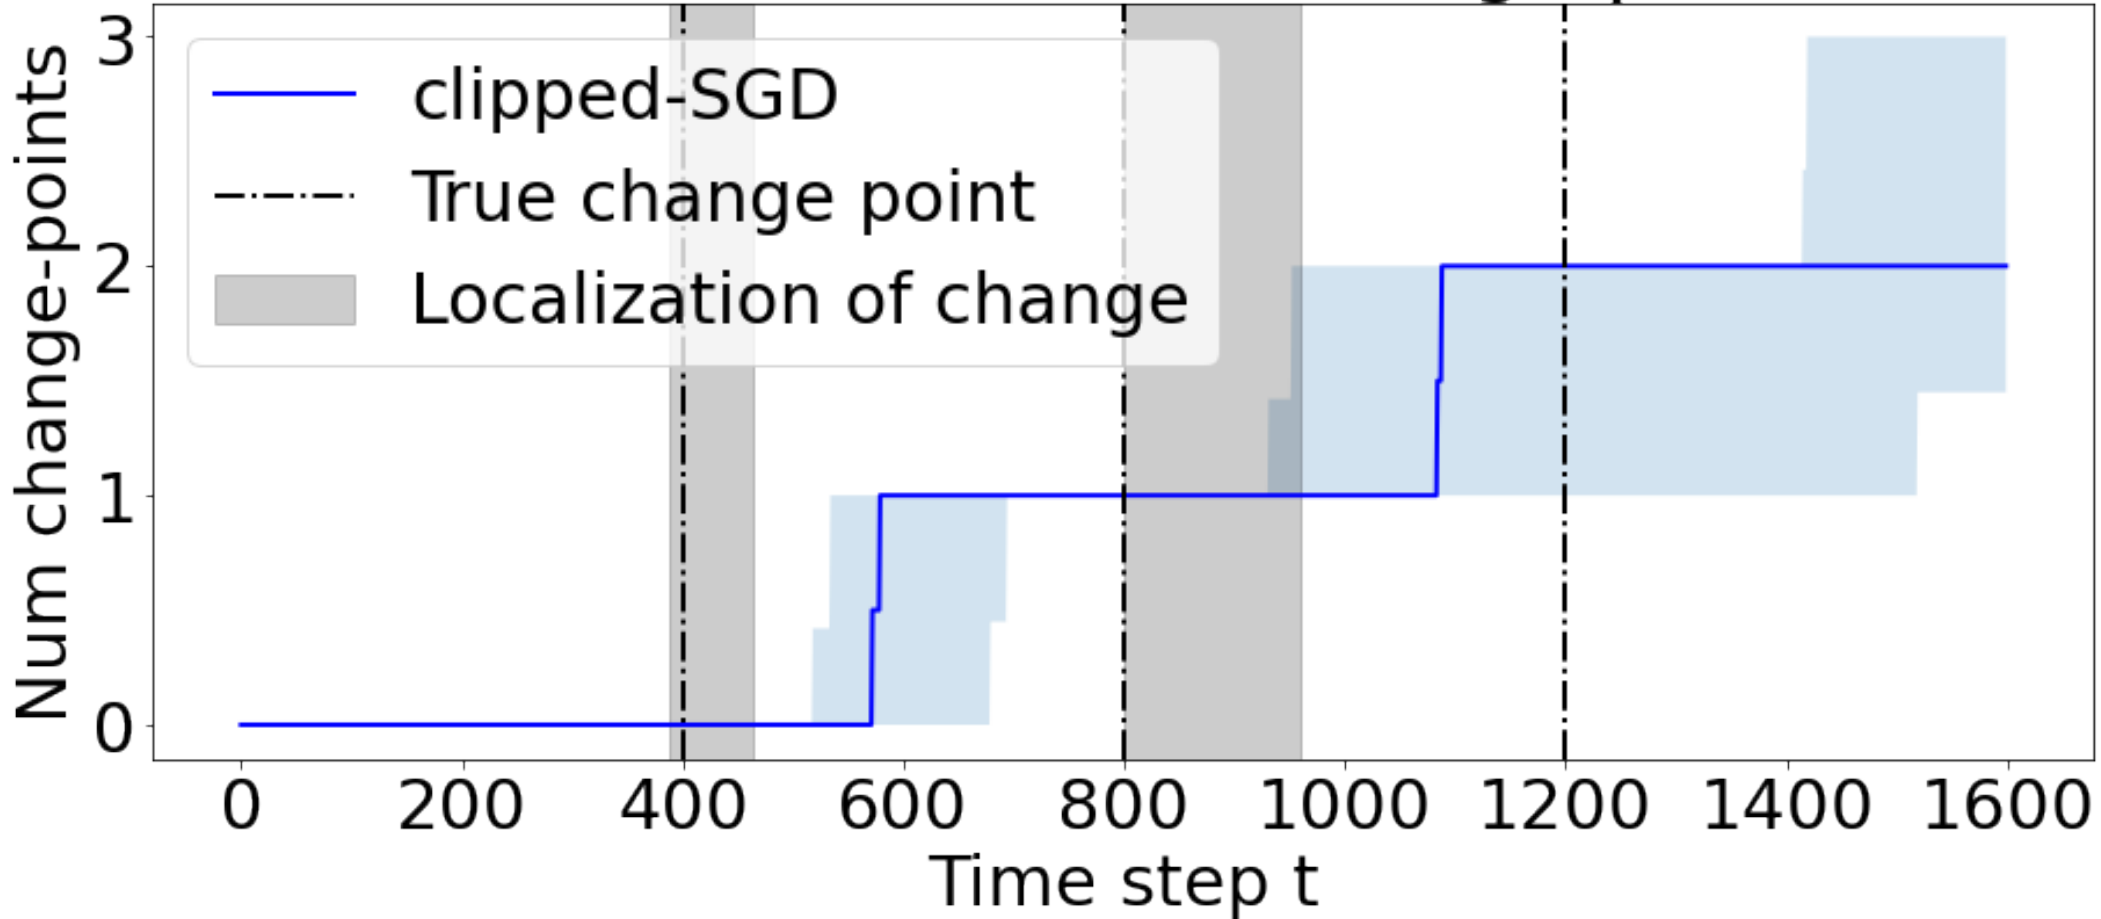

Supplement: supplementary_material [file attachment]

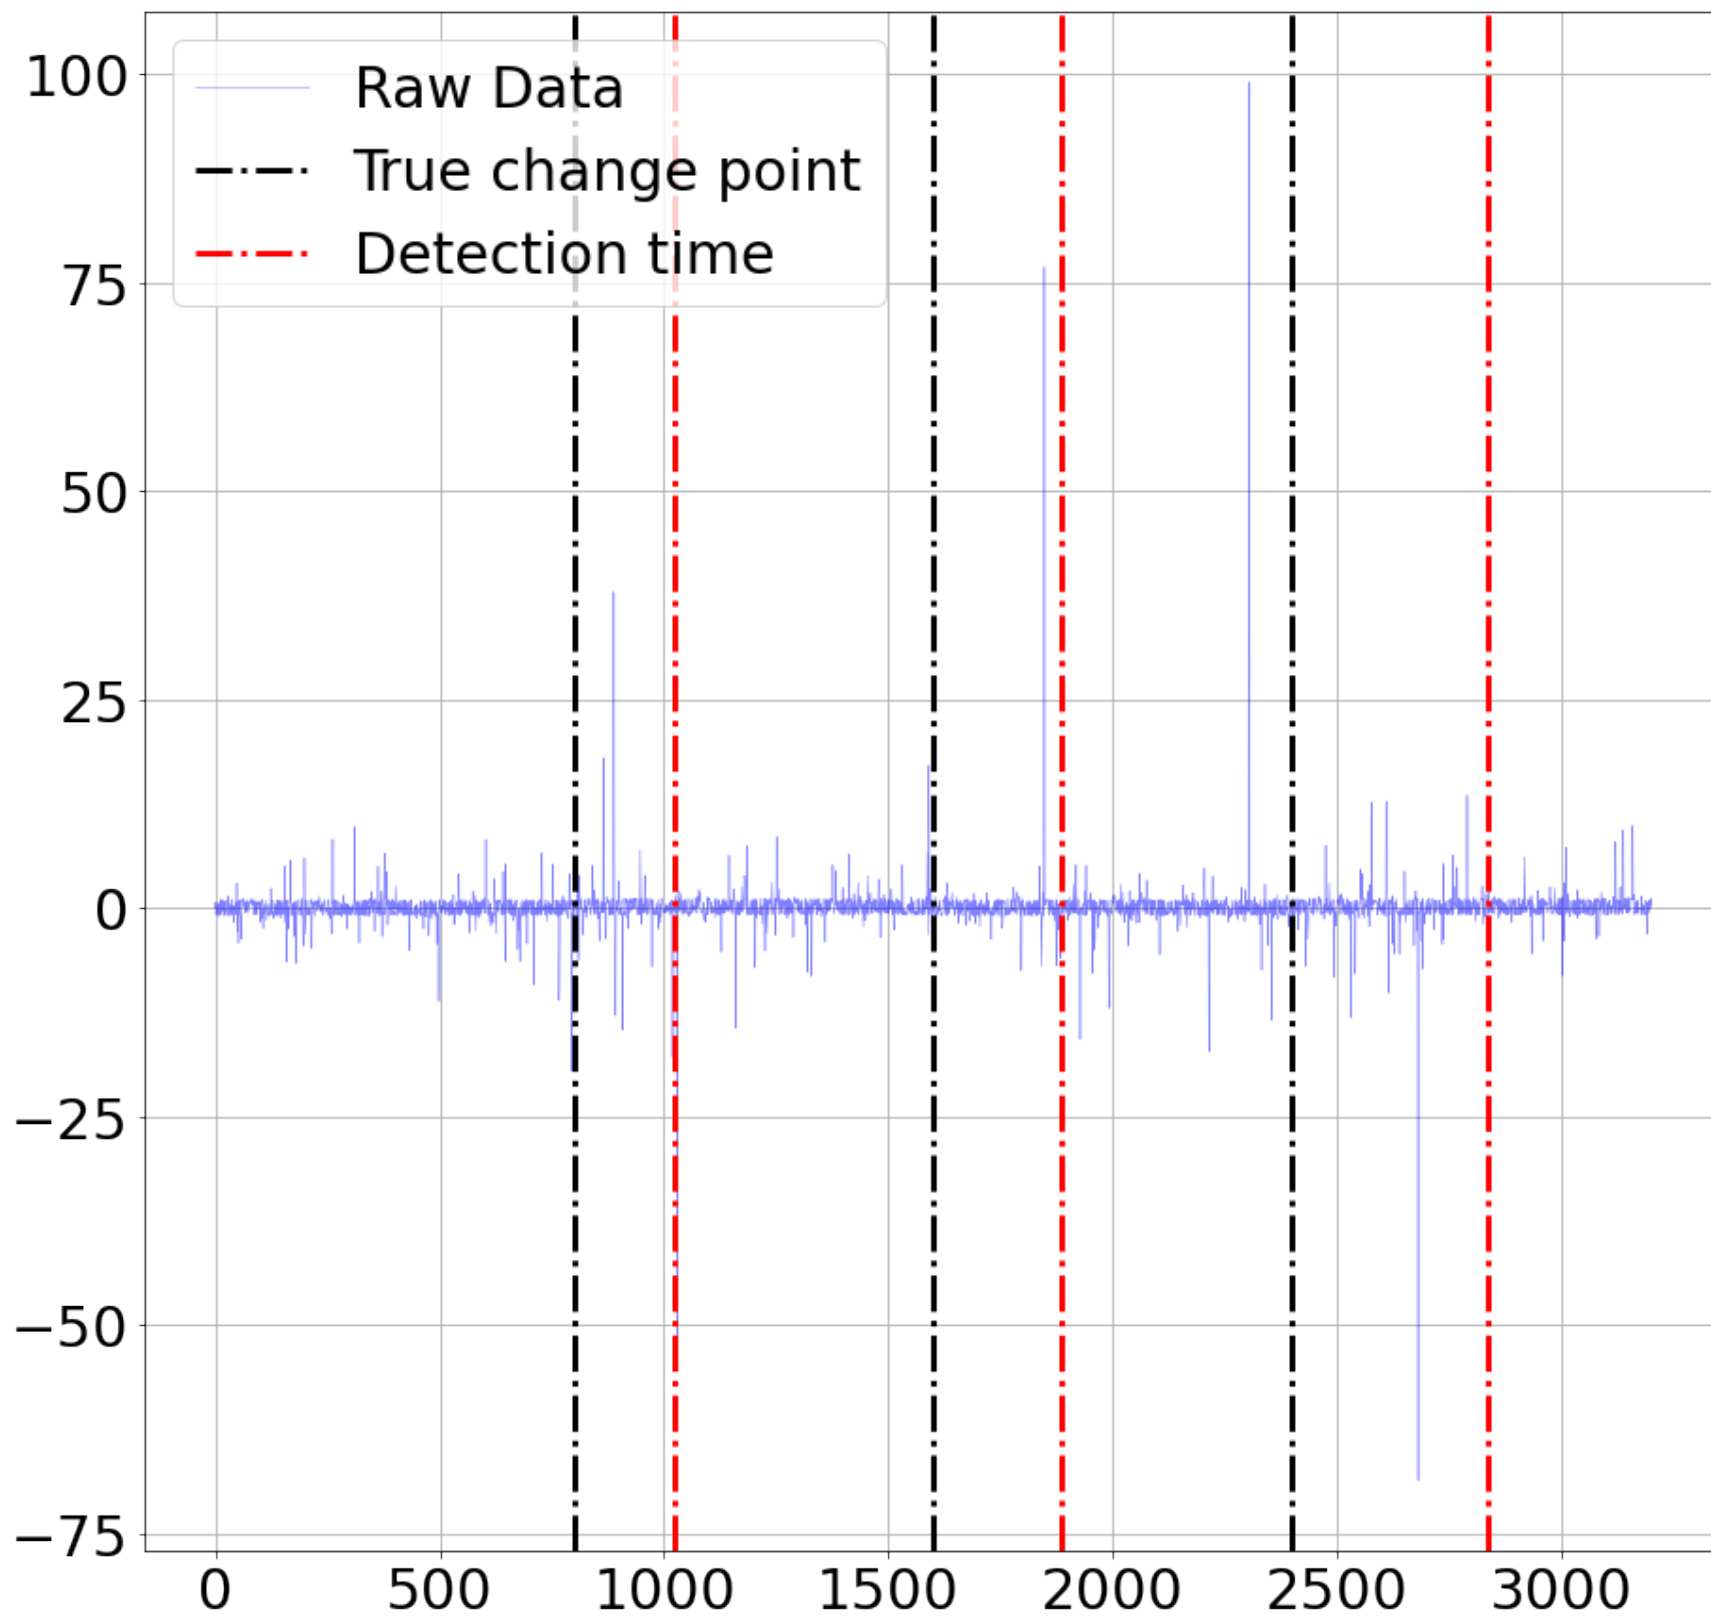

Supplement: supplementary_material [file attachment]

# Location of detected change-points

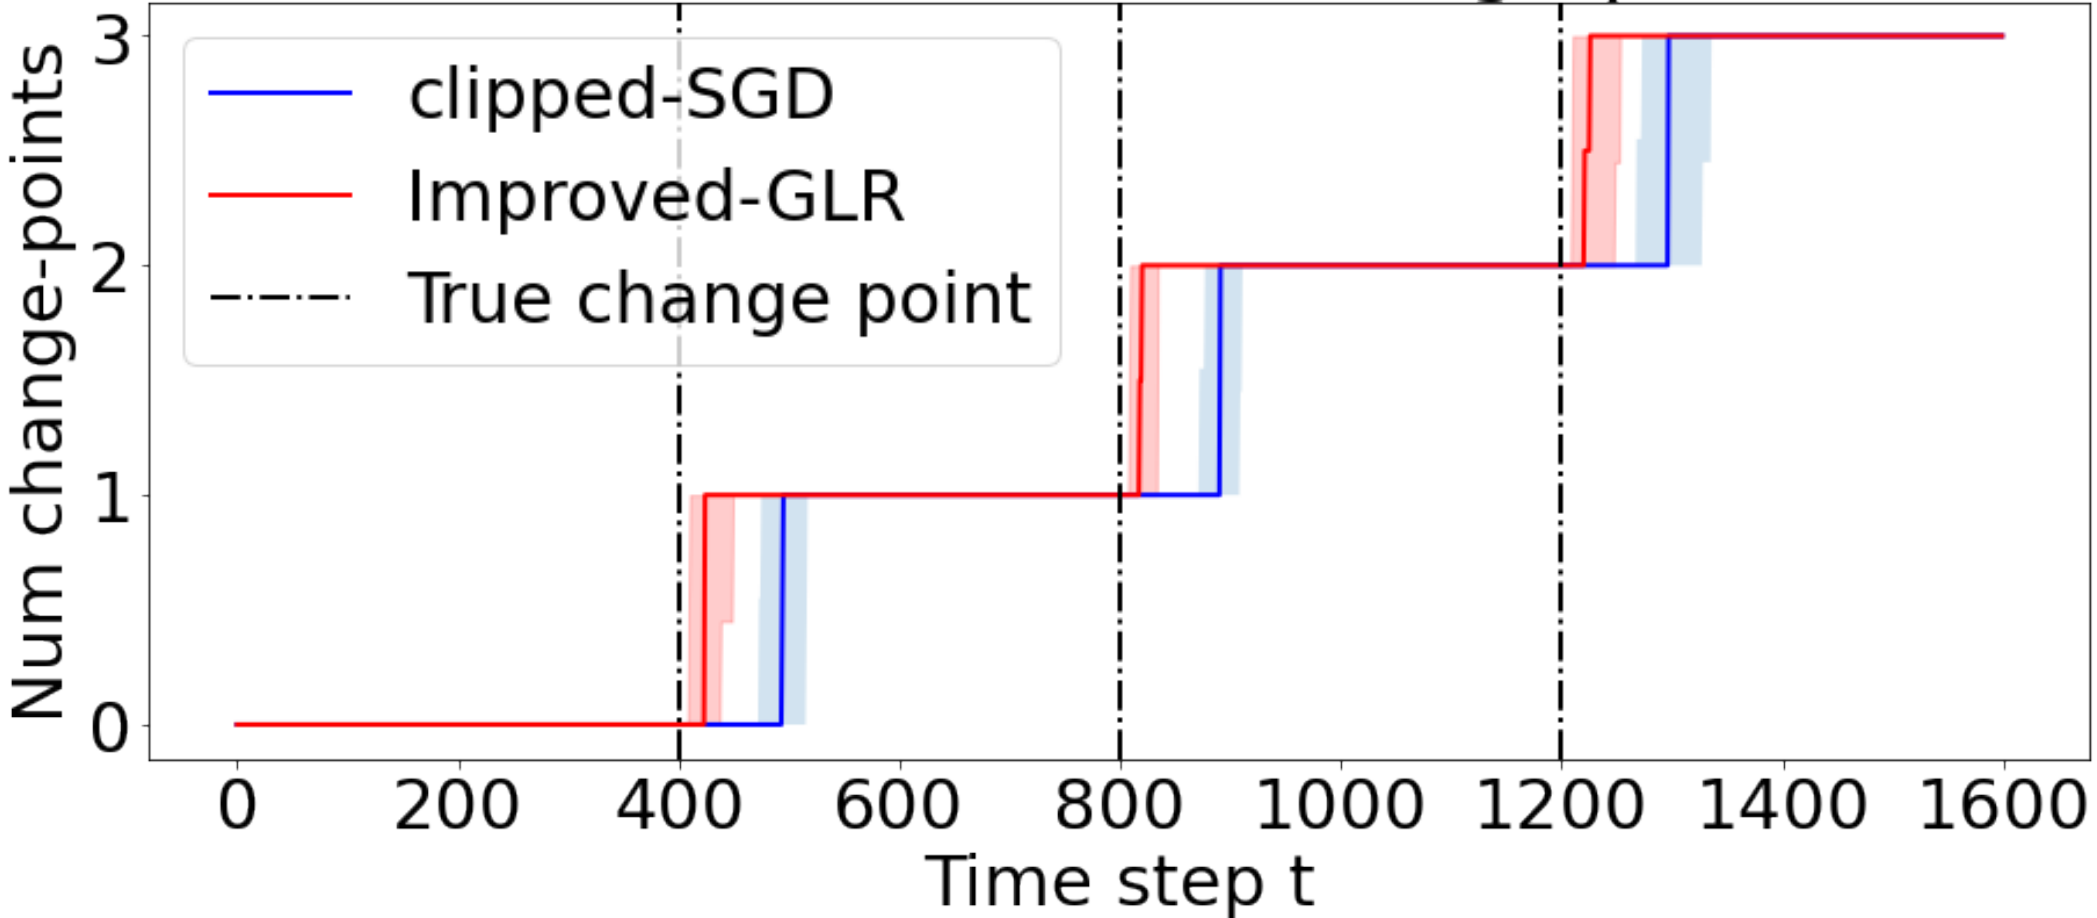

Supplement: supplementary_material [file attachment]

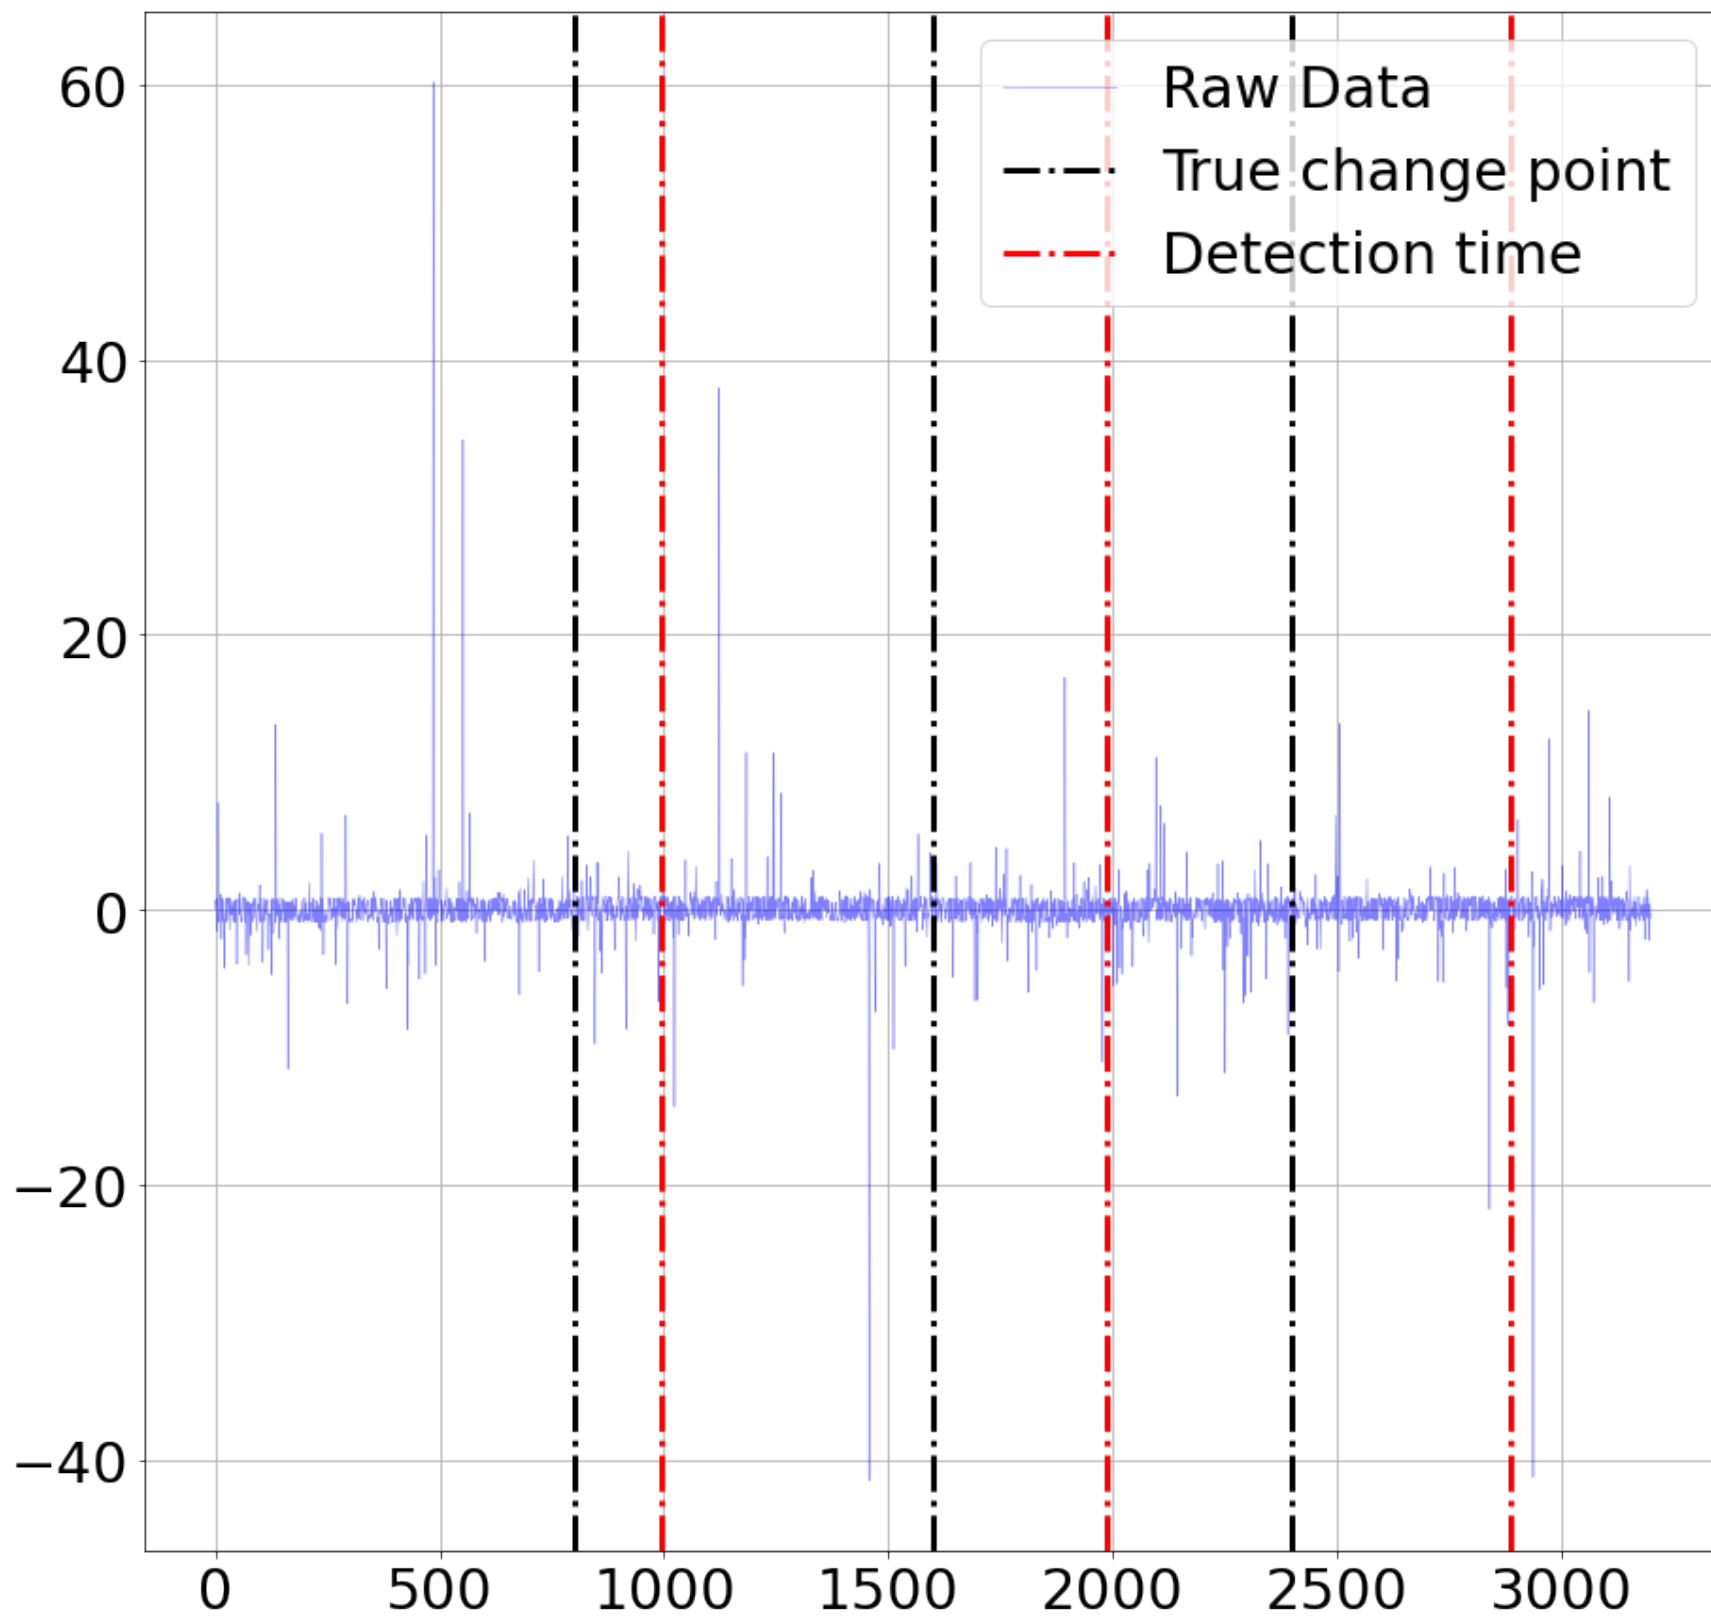

Supplement: supplementary_material [file attachment]

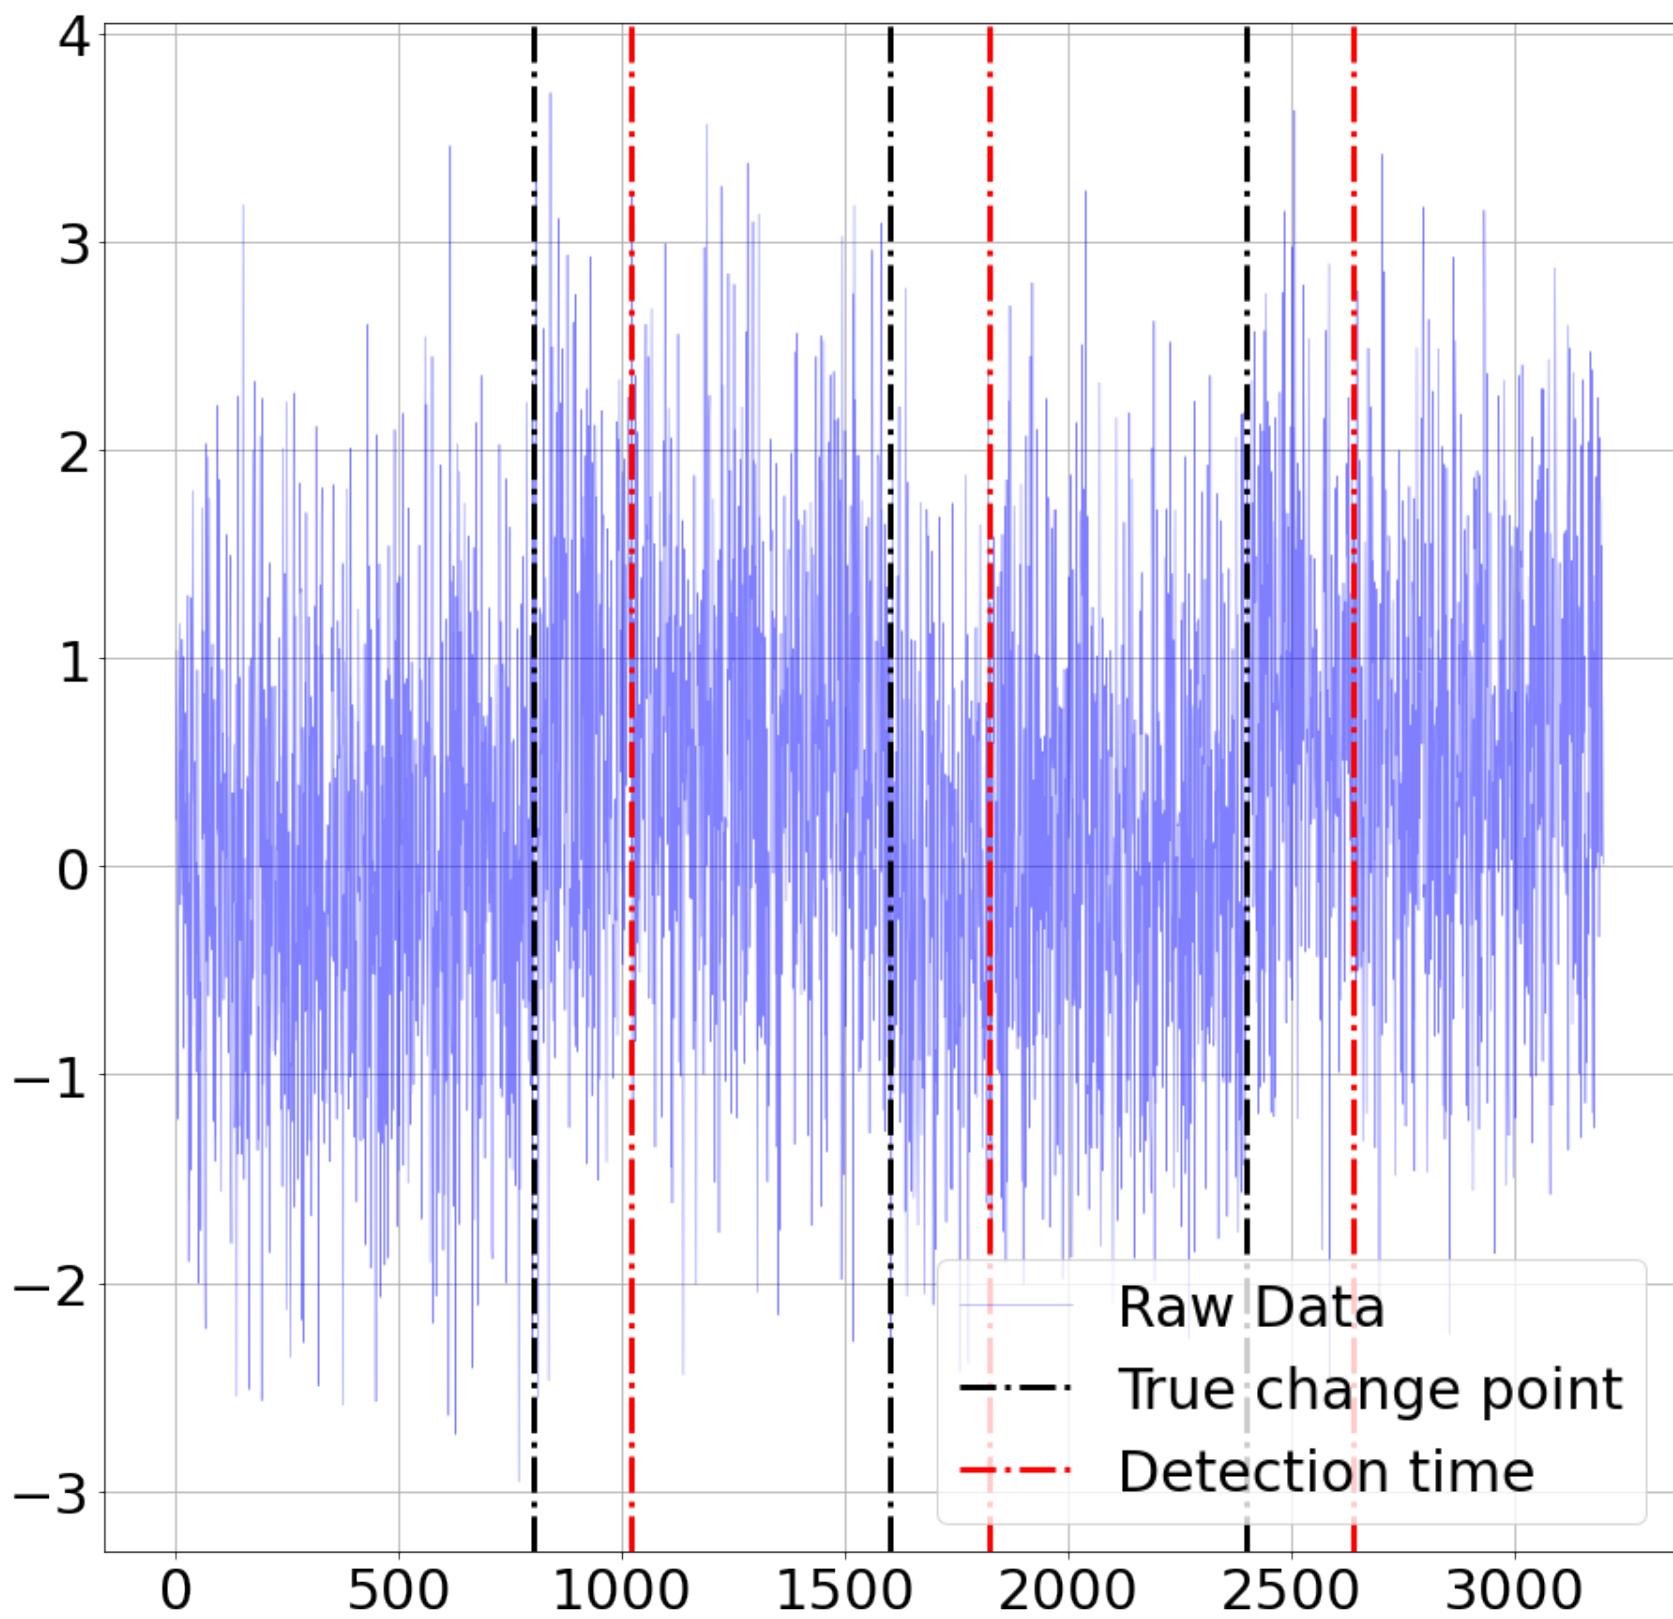

Supplement: supplementary_material [file attachment]

# Location of detected change-points

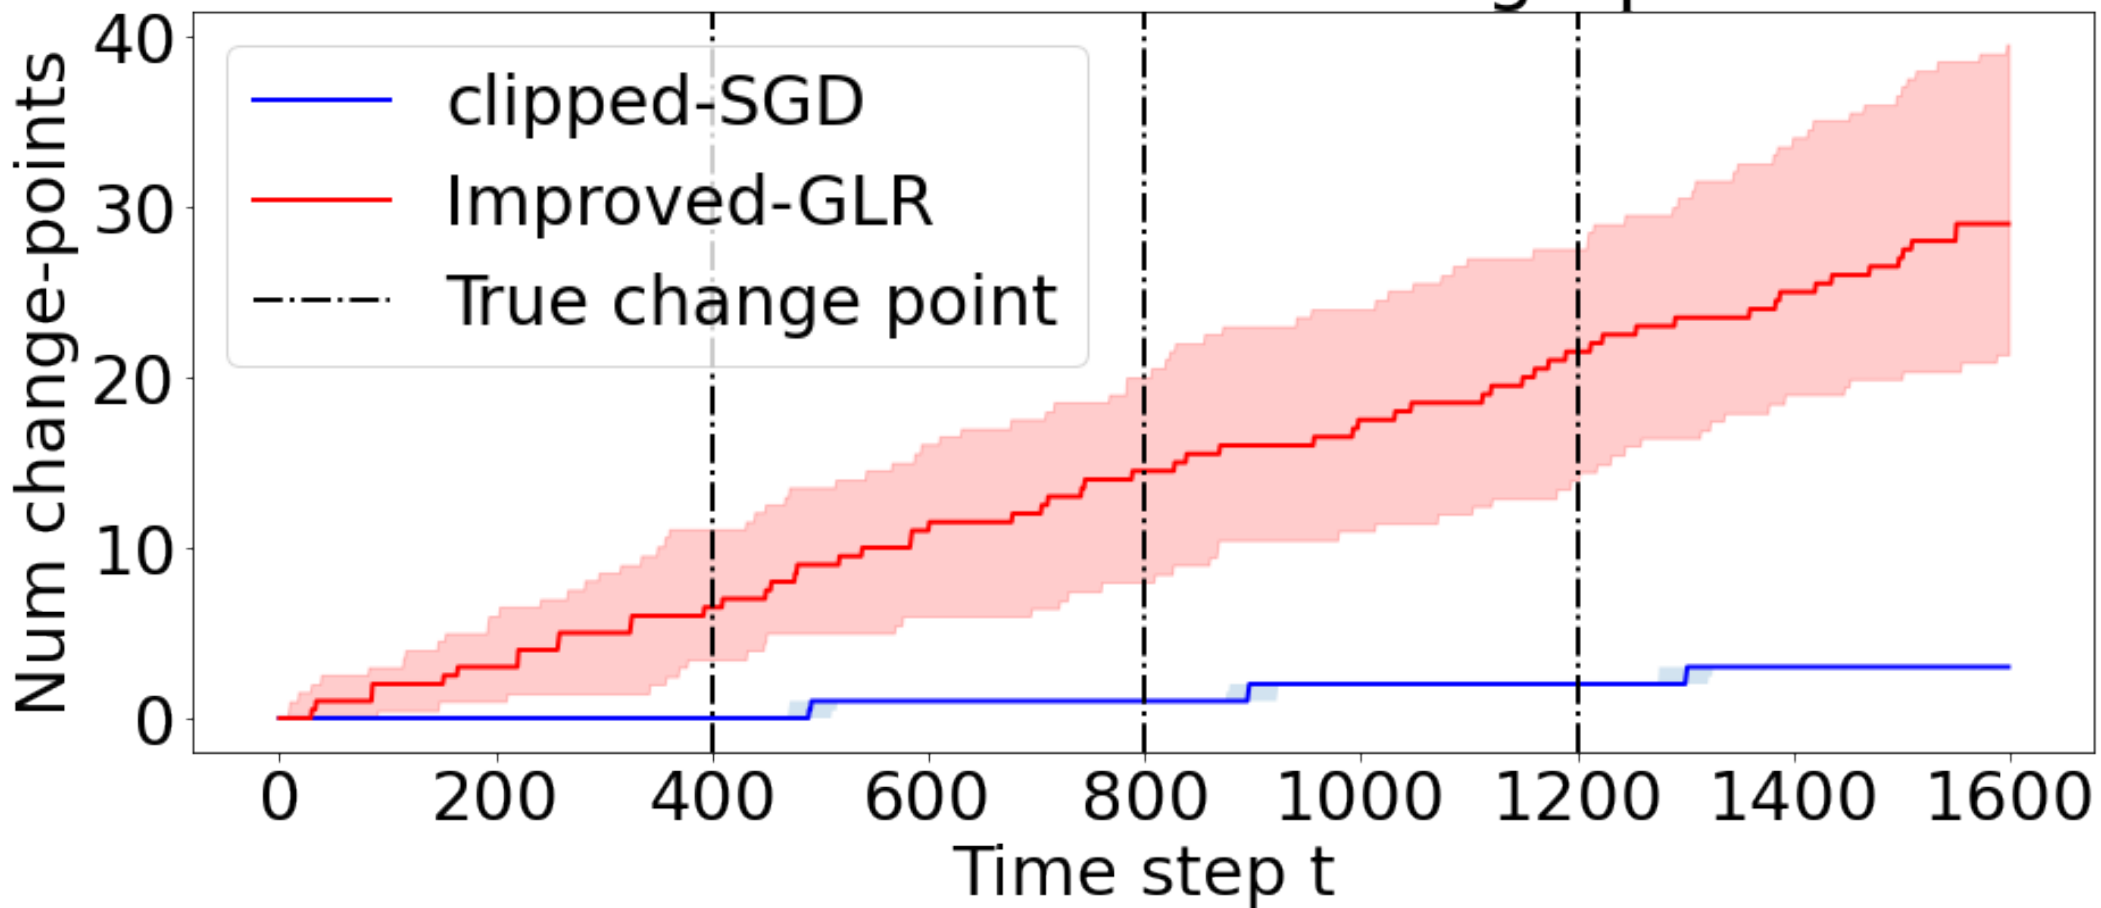

Supplement: supplementary_material [file attachment]

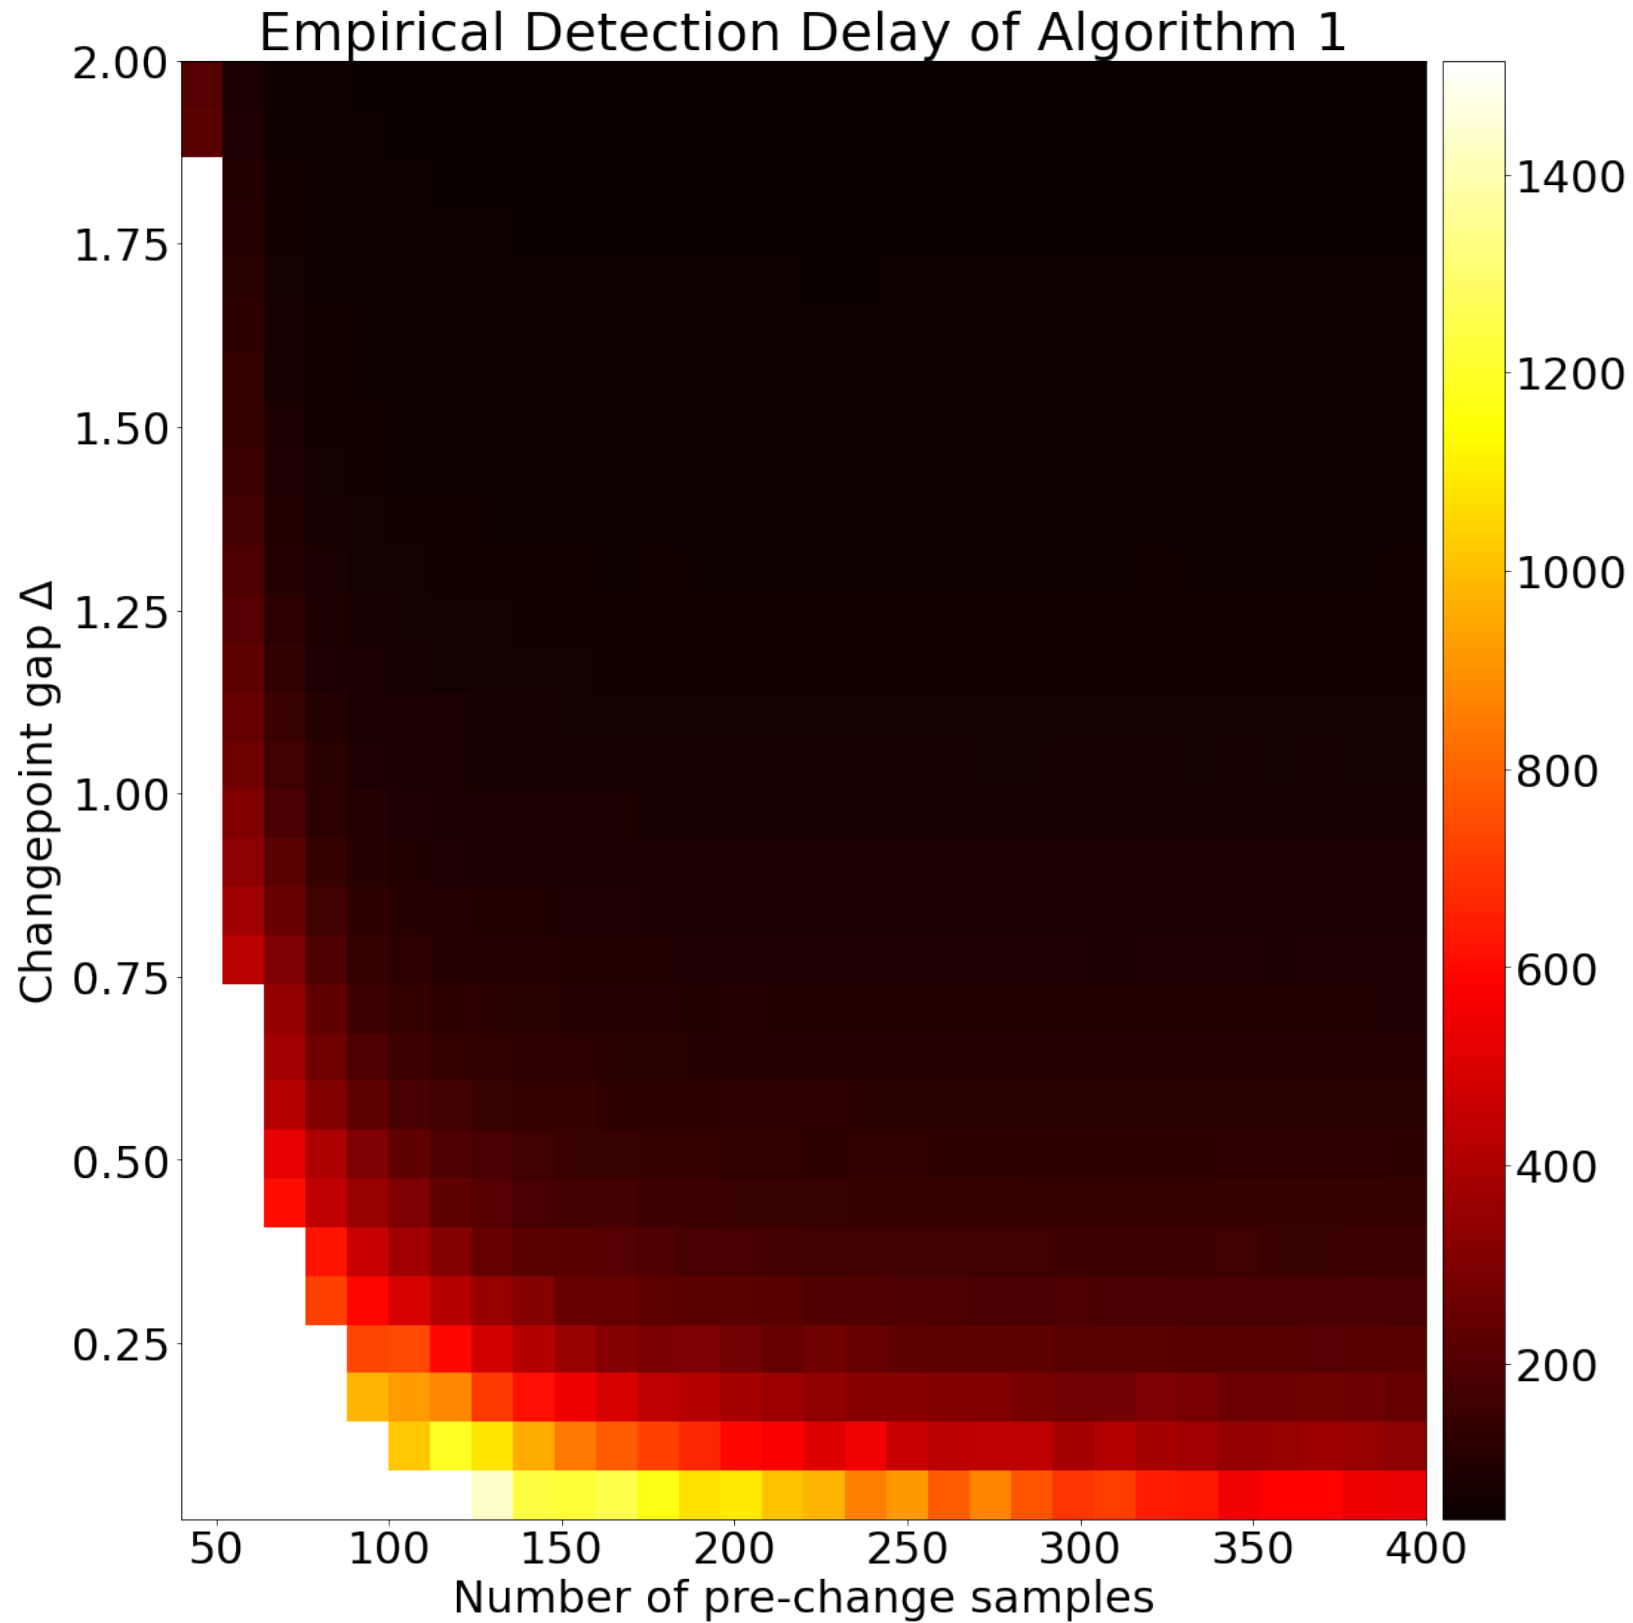

Supplement: supplementary_material [file attachment]

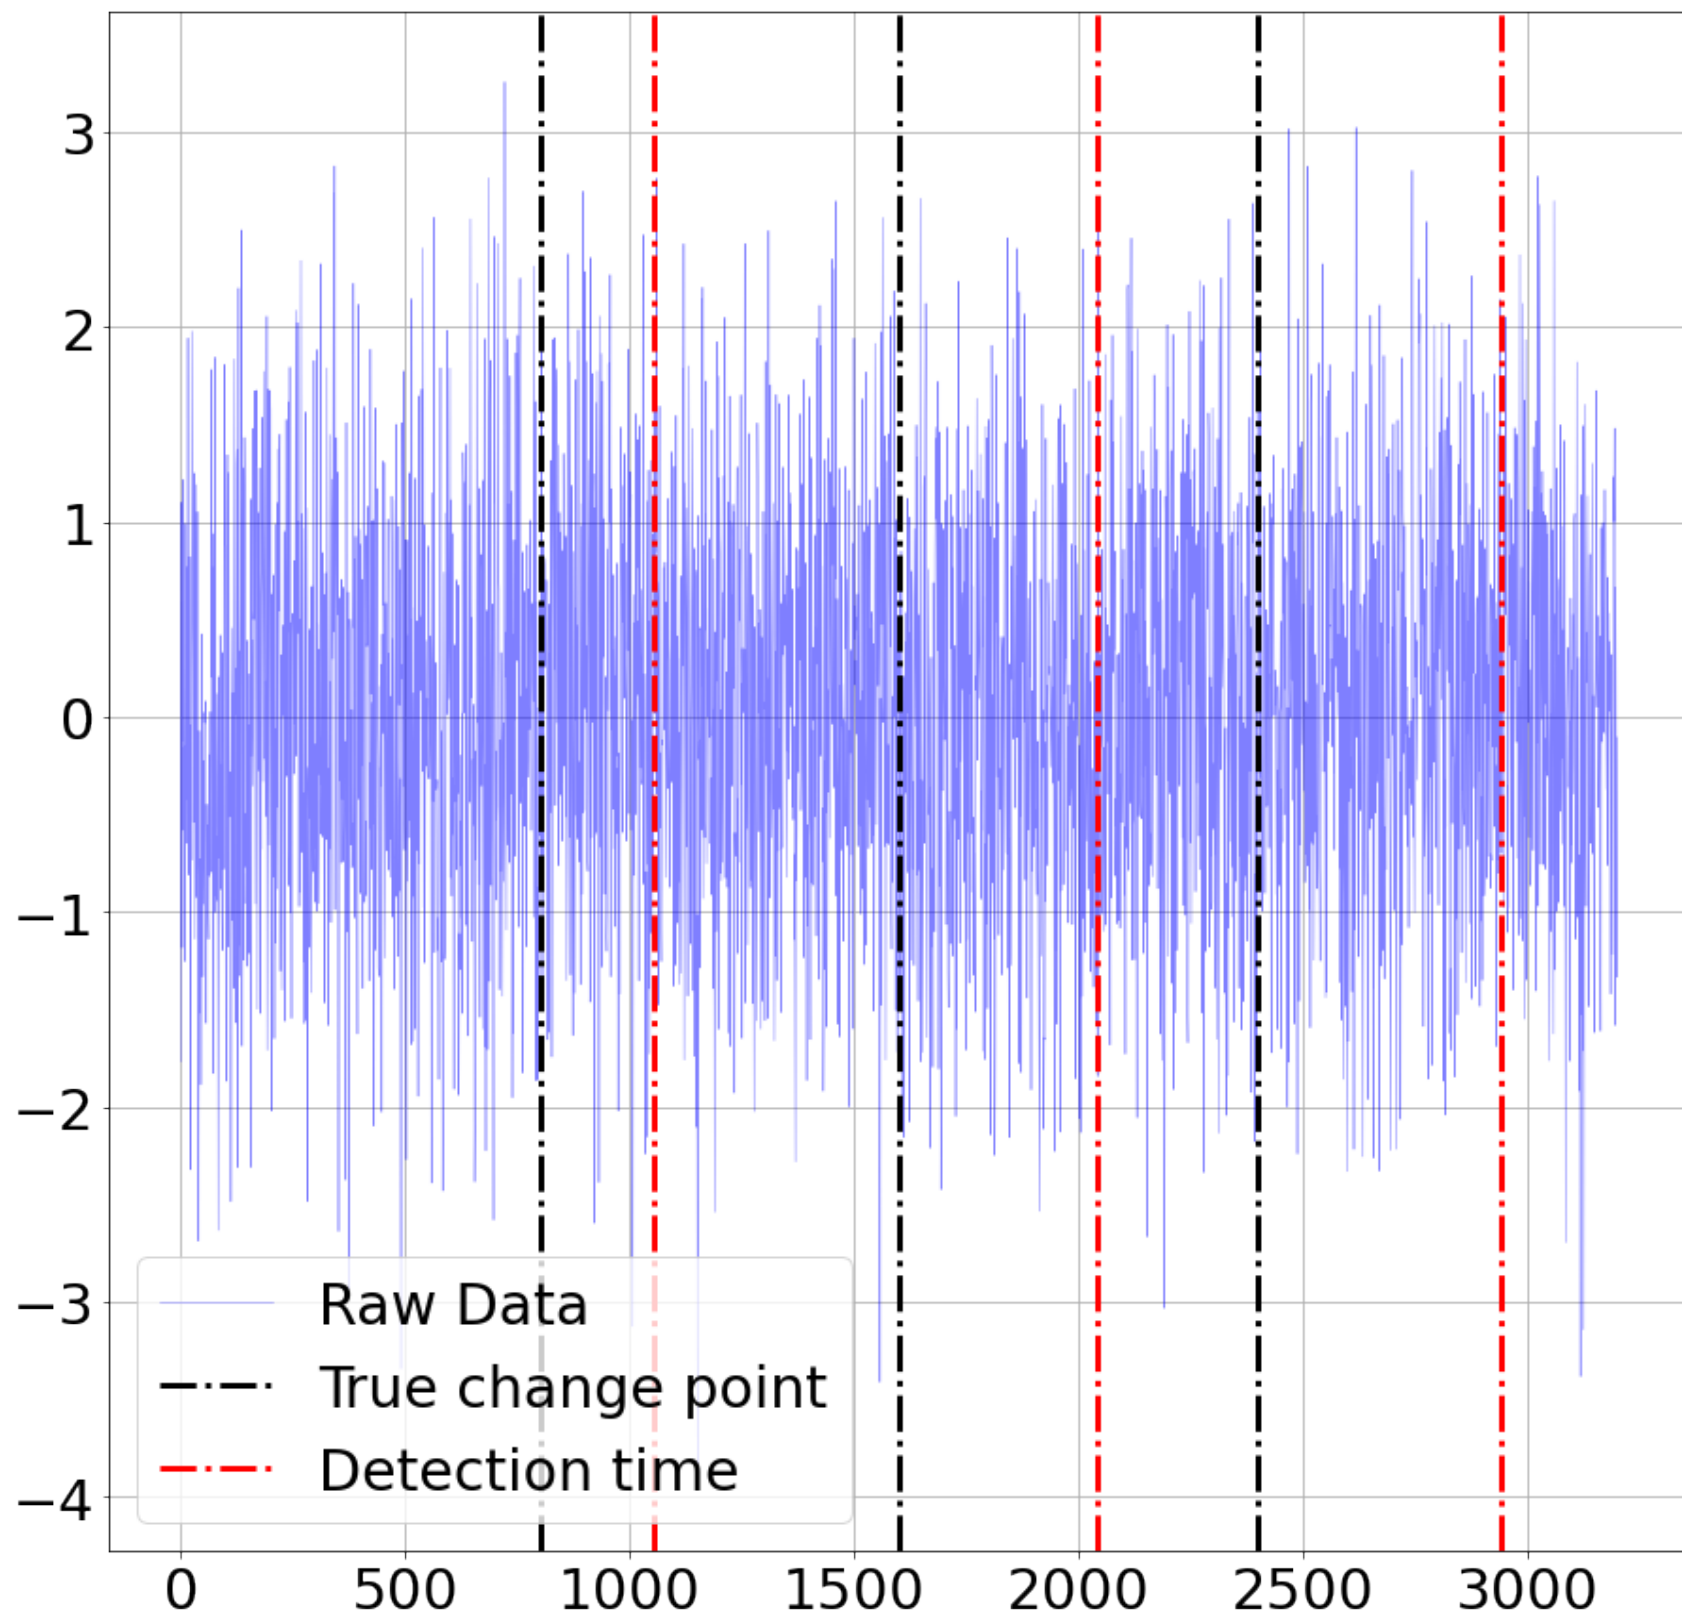

Supplement: supplementary_material [file attachment]

clipped-SGD

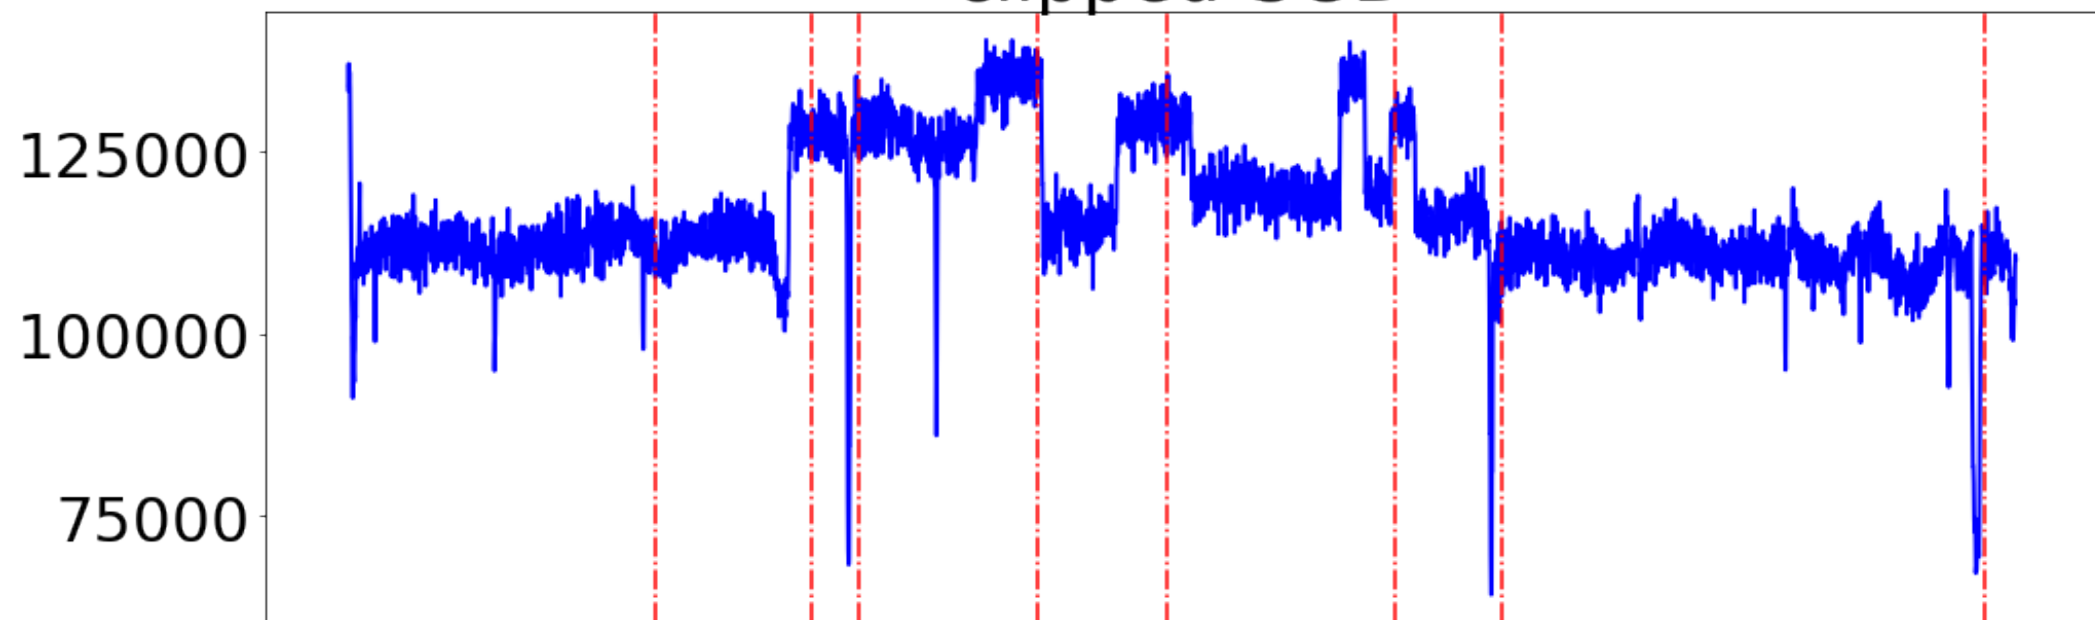

Improved GLR



Supplement: supplementary_material [file attachment]

# Location of detected change-points

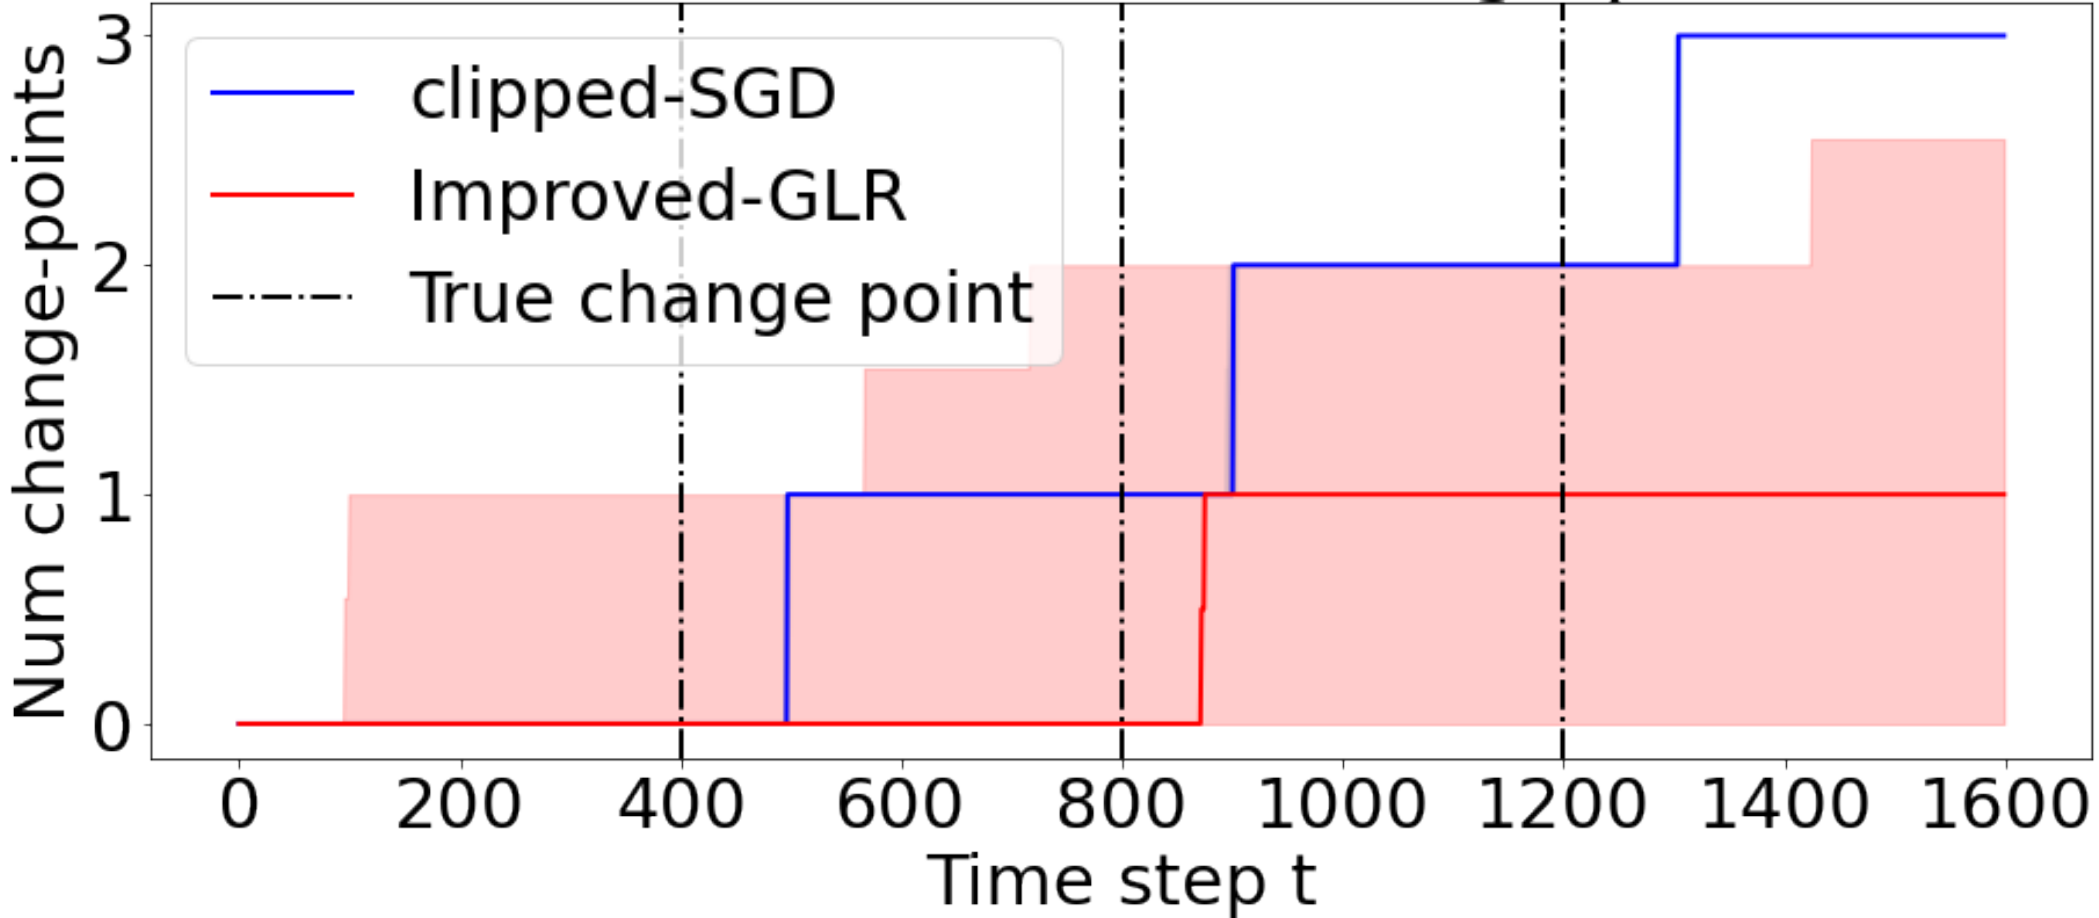

Supplement: supplementary_material [file attachment]

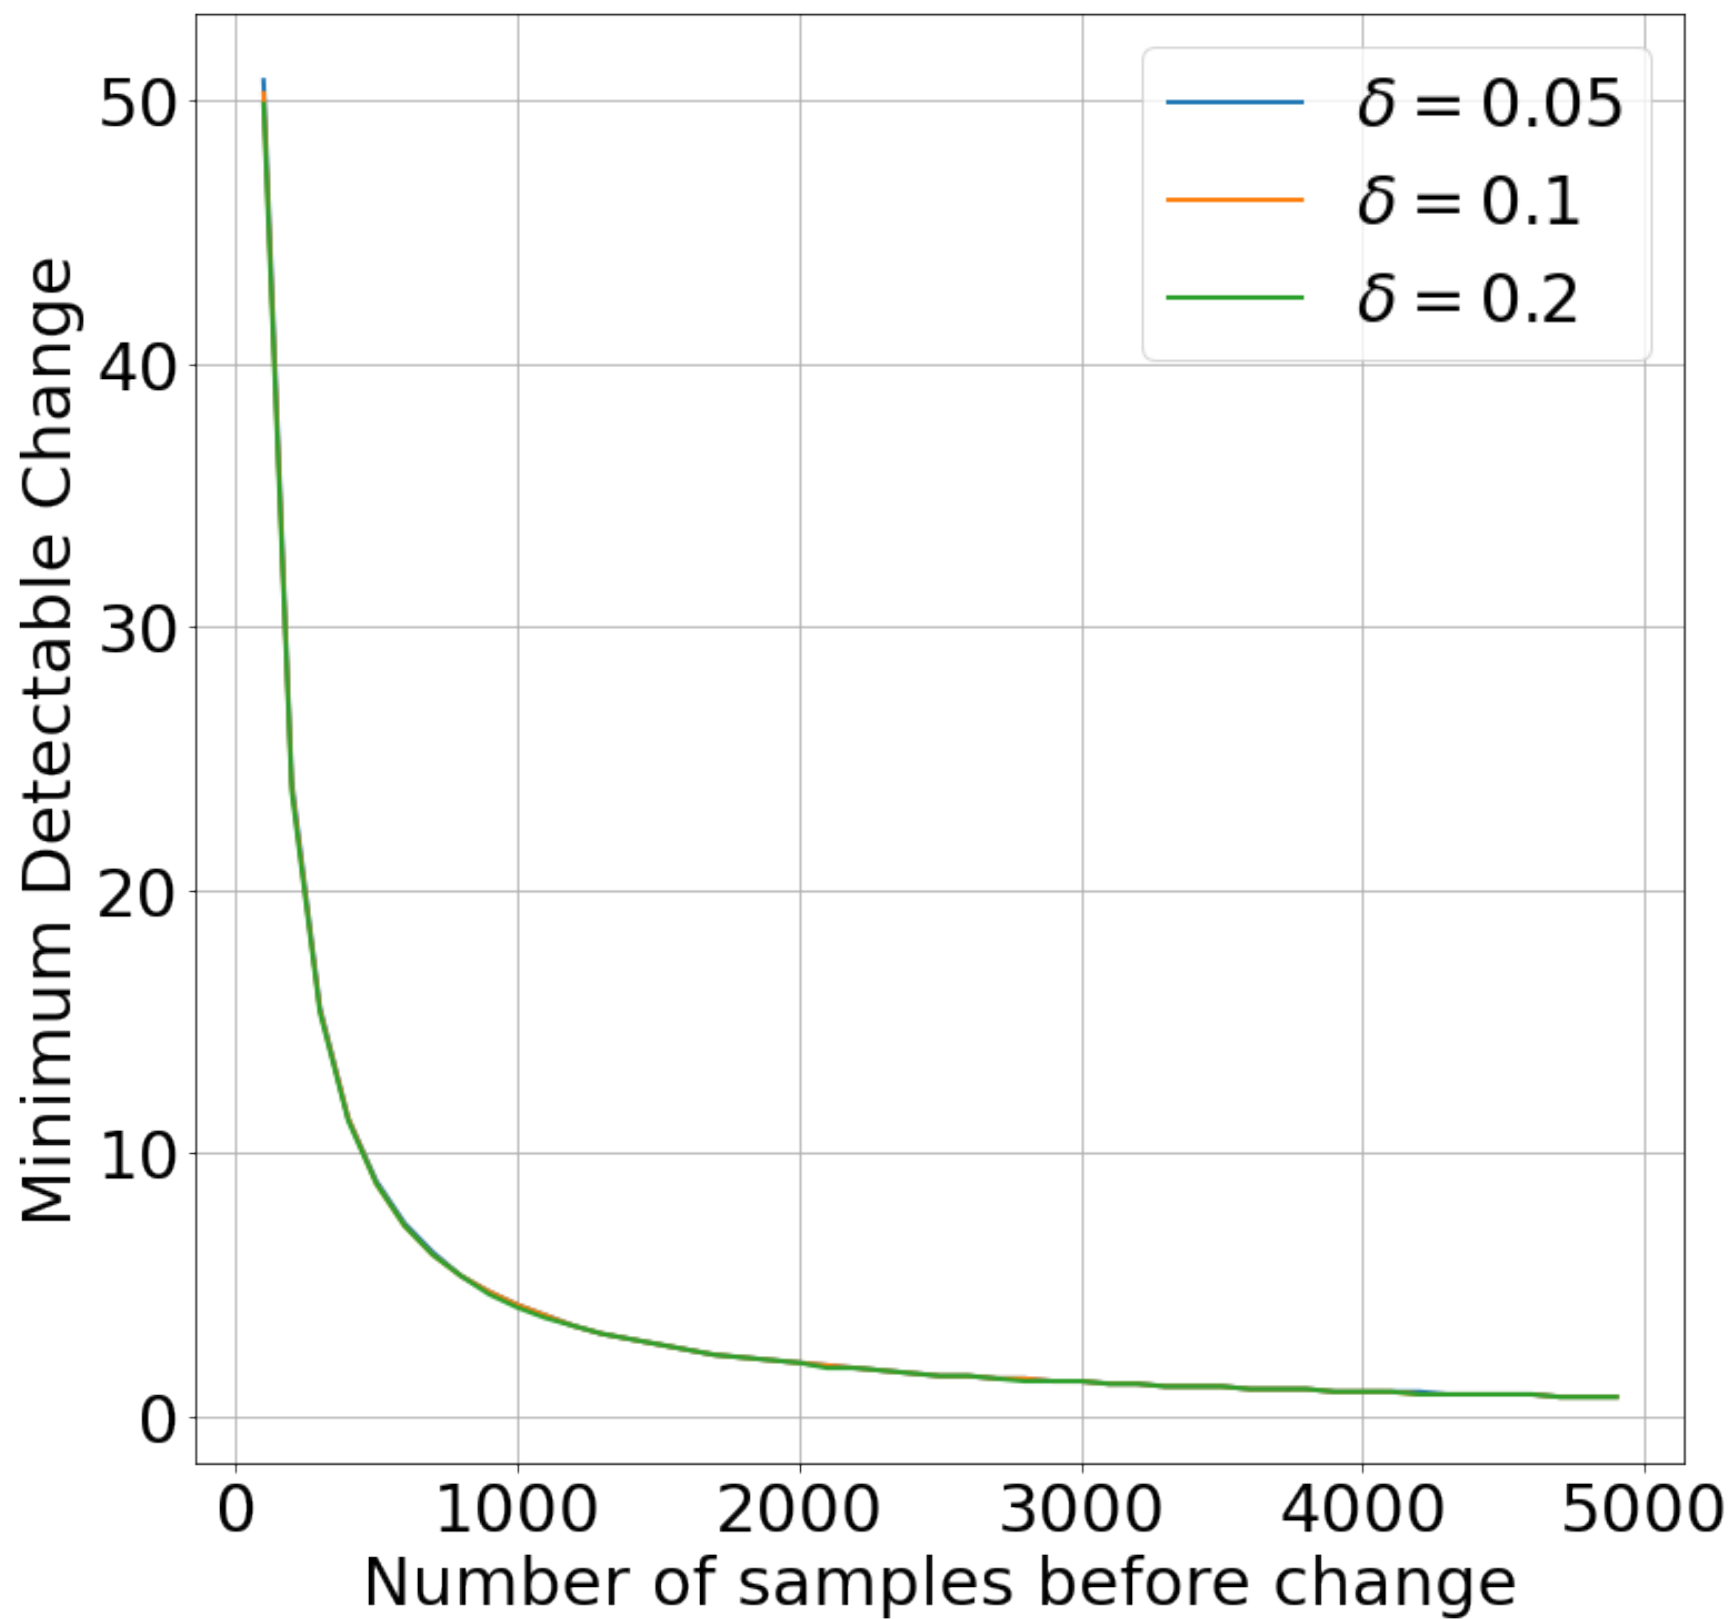

Supplement: supplementary_material [file attachment]

# Location of detected change-points

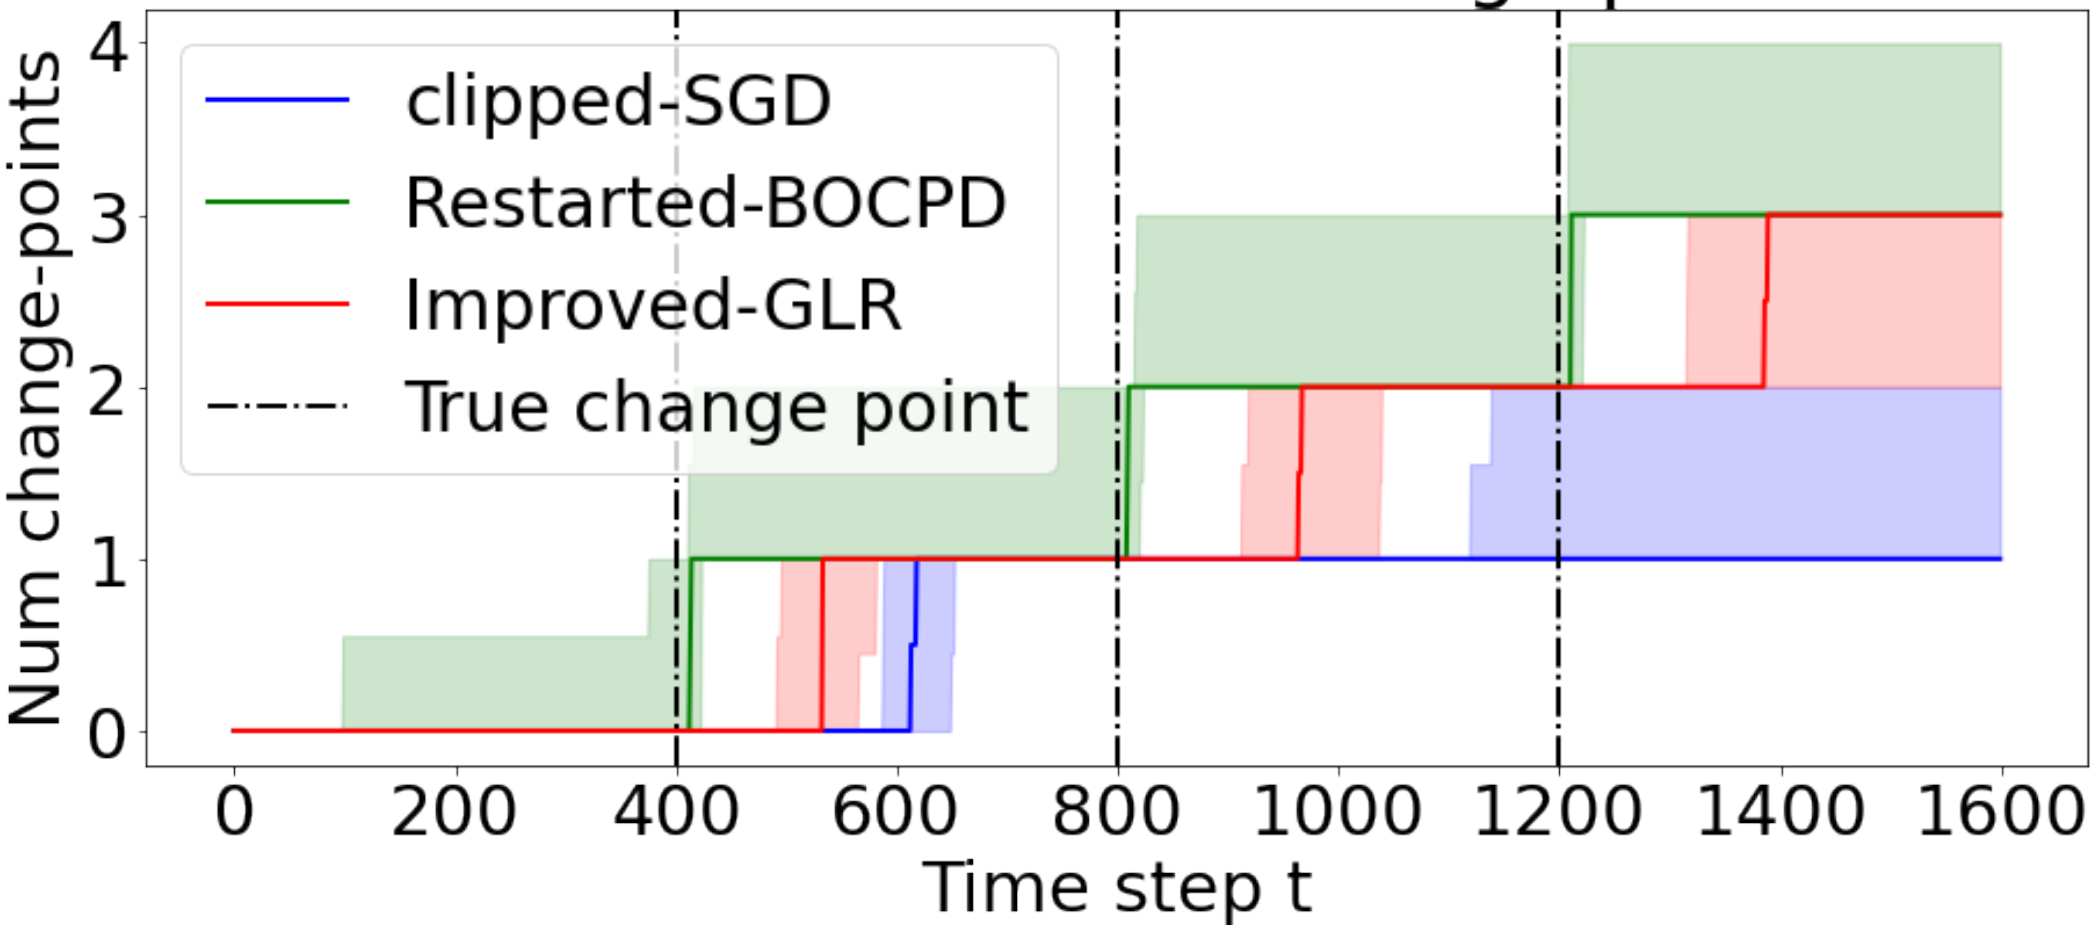

Supplement: supplementary_material [file attachment]

# Location of detected change-points

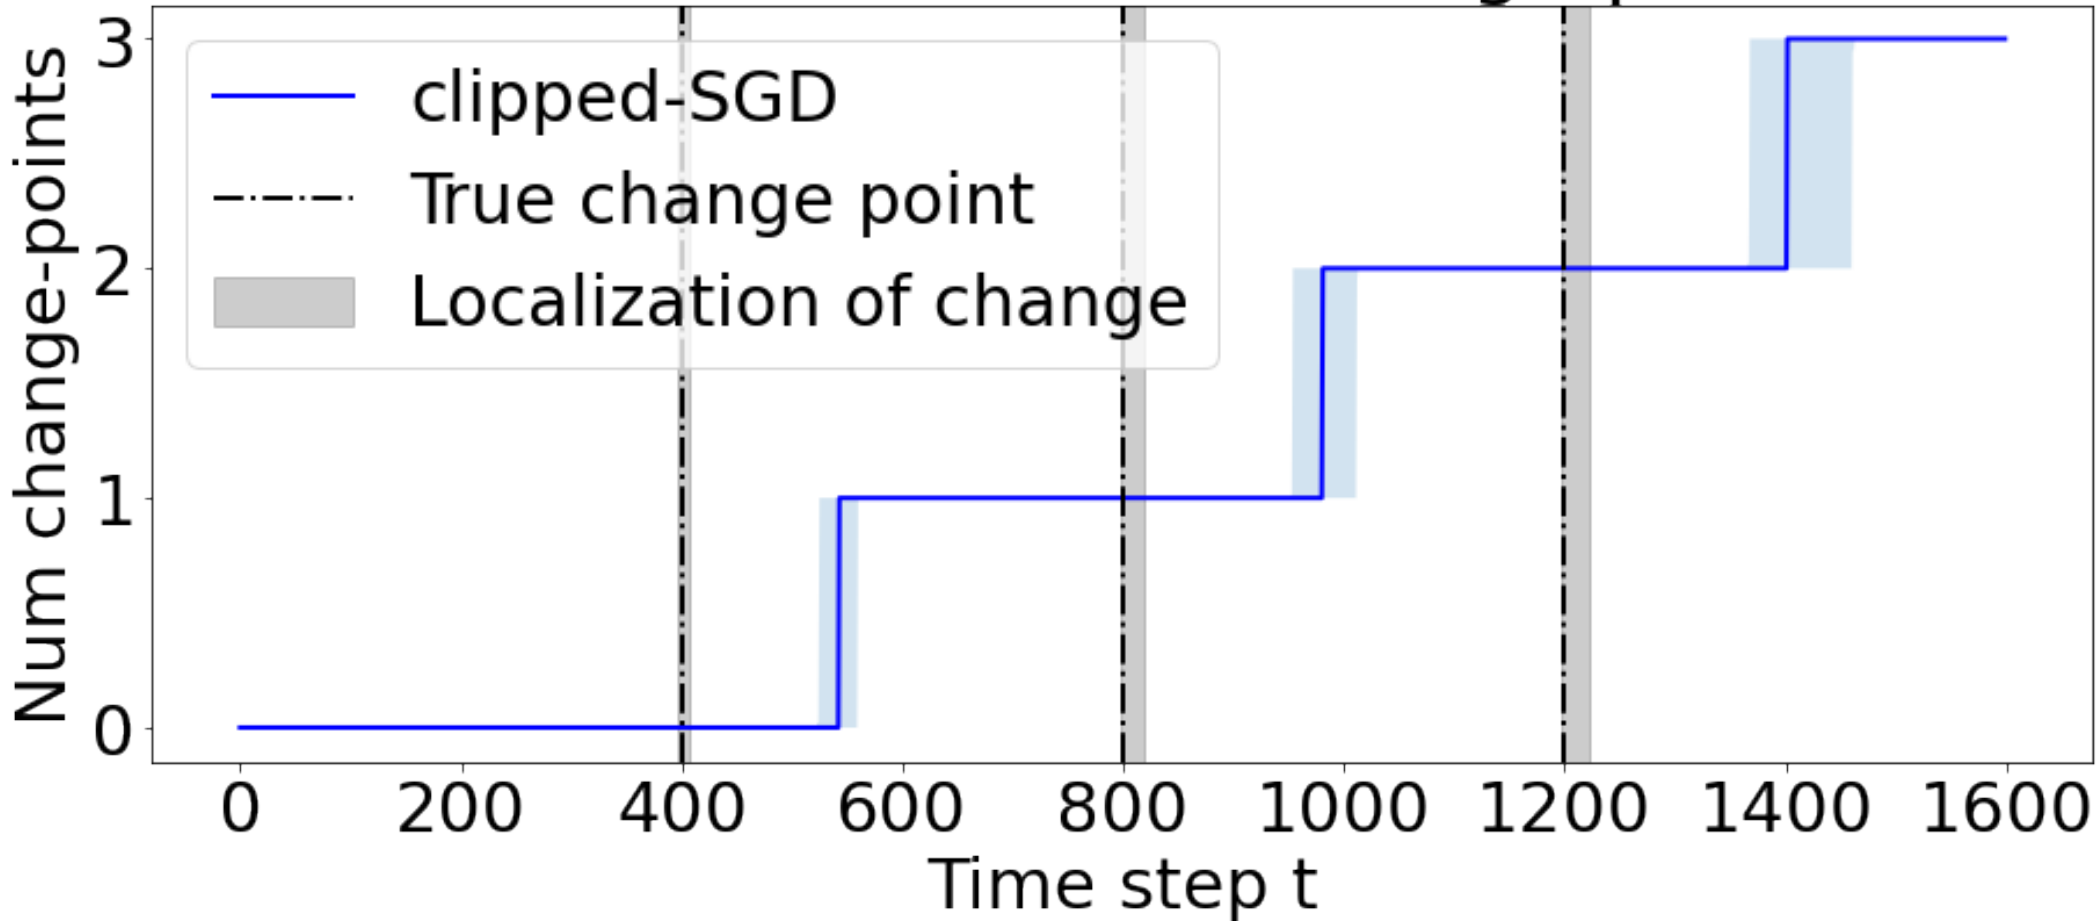

Supplement: supplementary_material [file attachment]

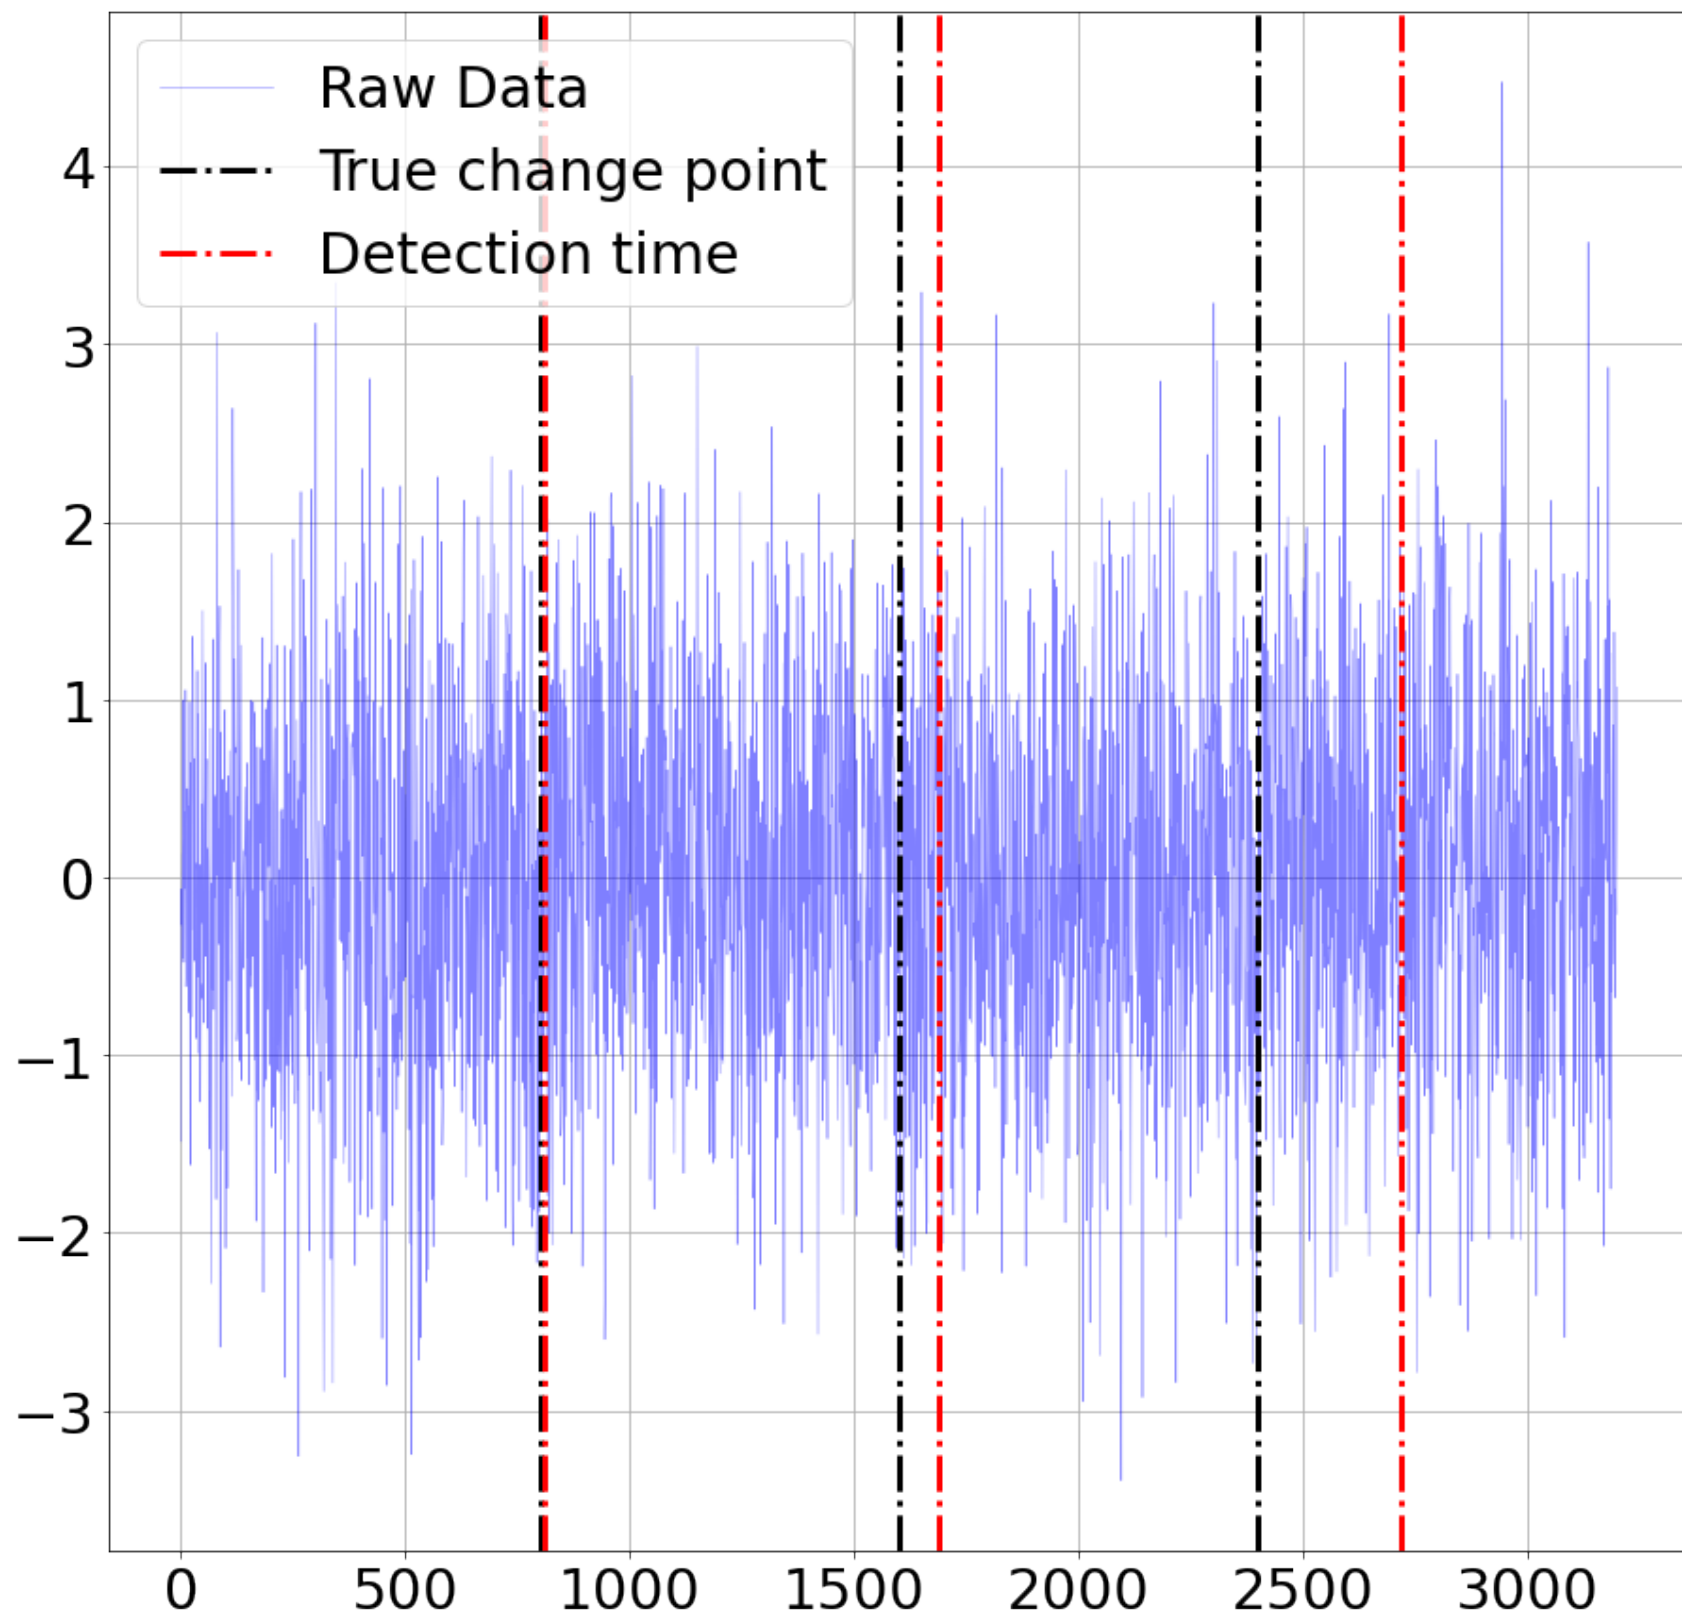

Supplement: supplementary_material [file attachment]

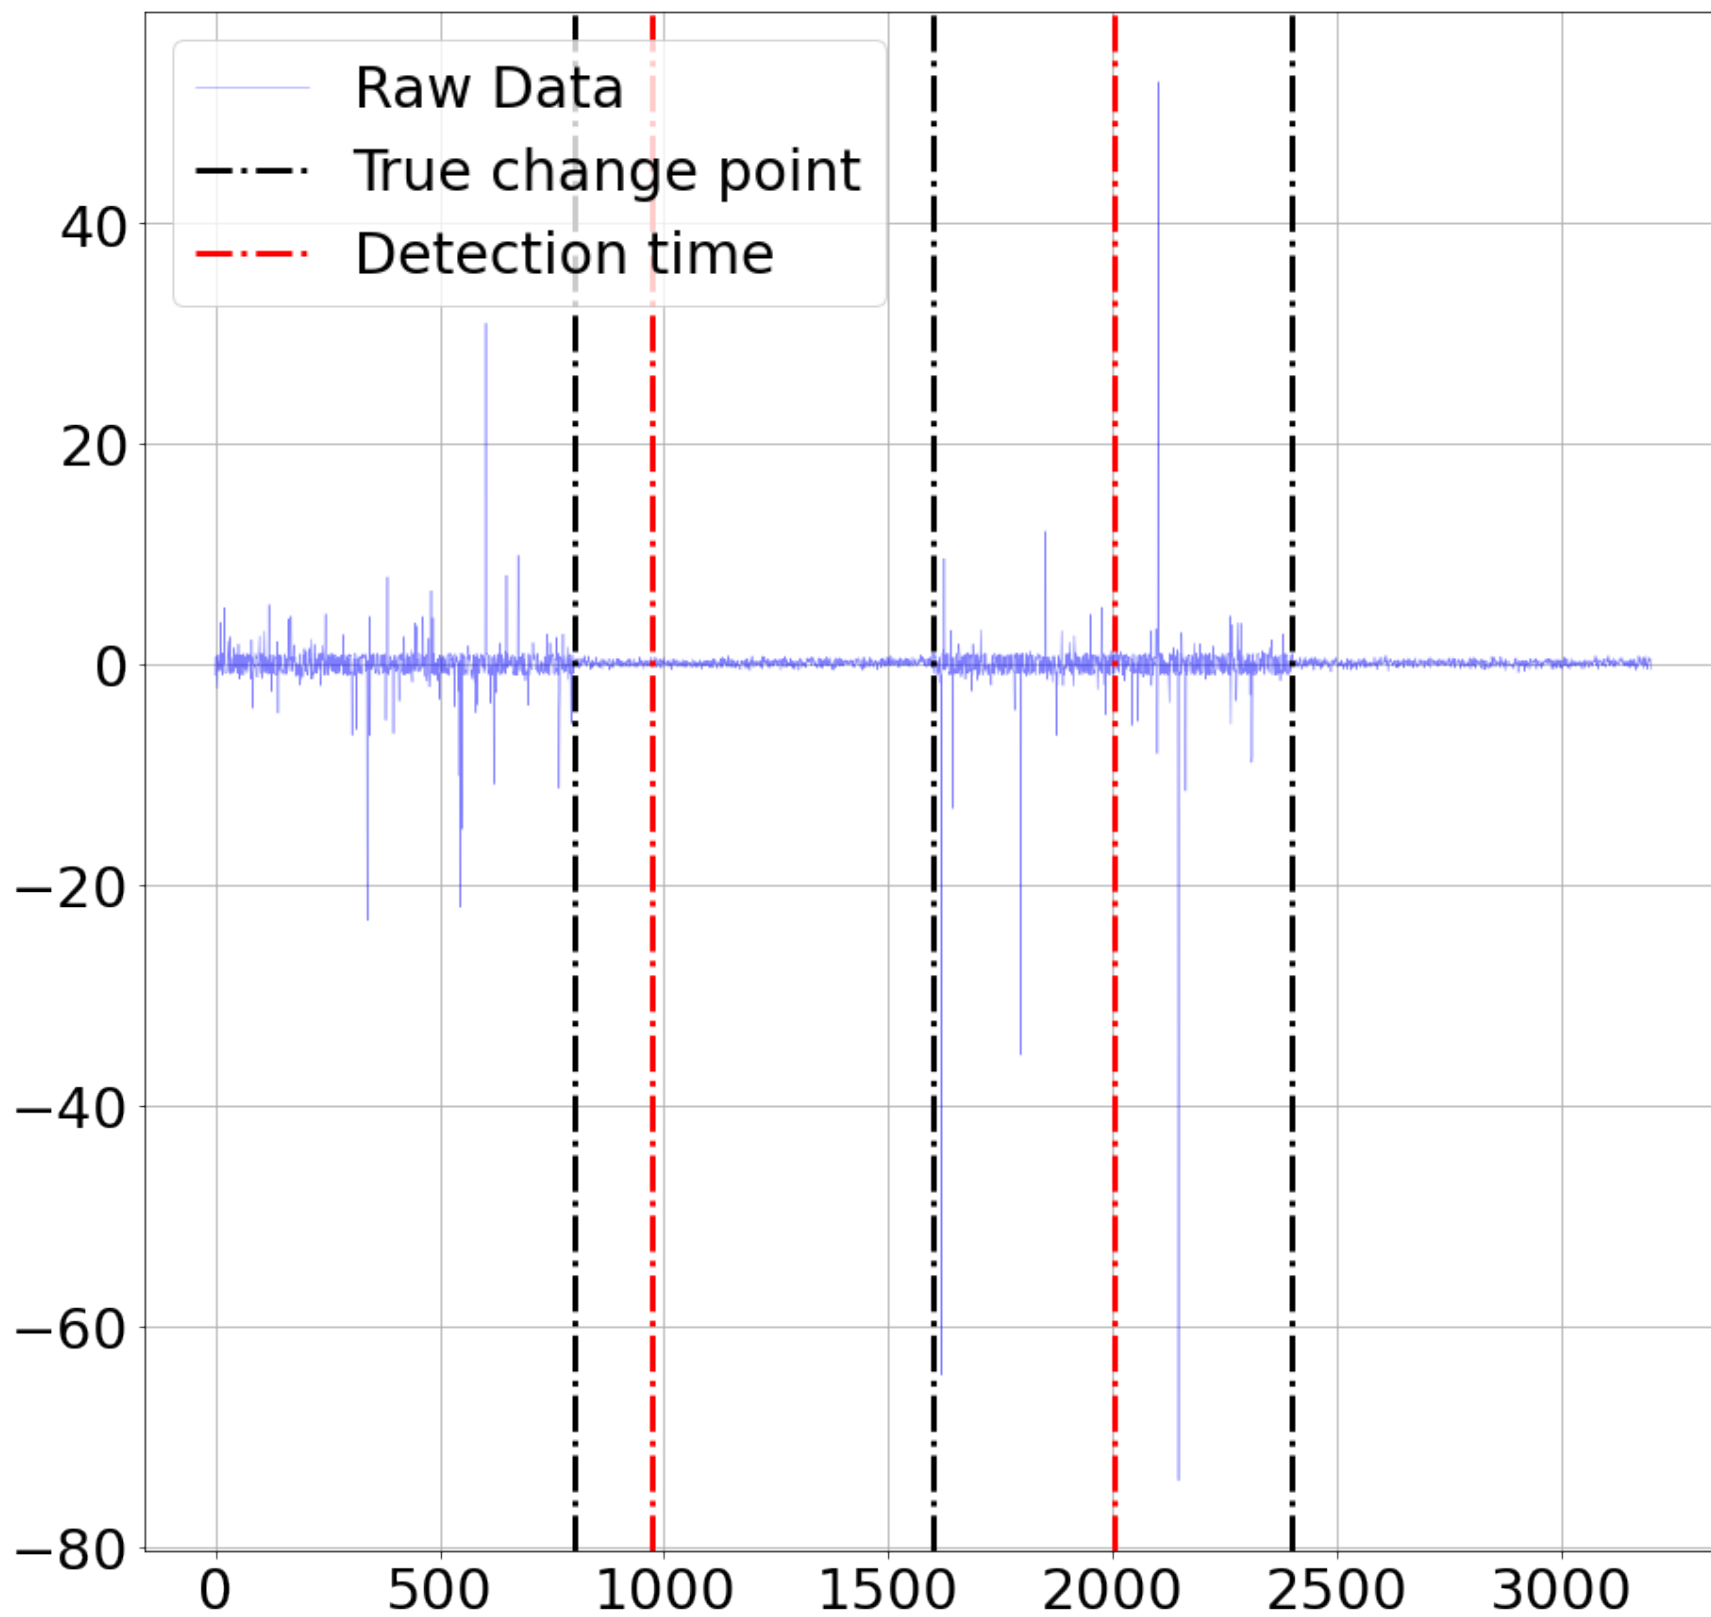

Supplement: supplementary_material [file attachment]

## Location of detected change-points

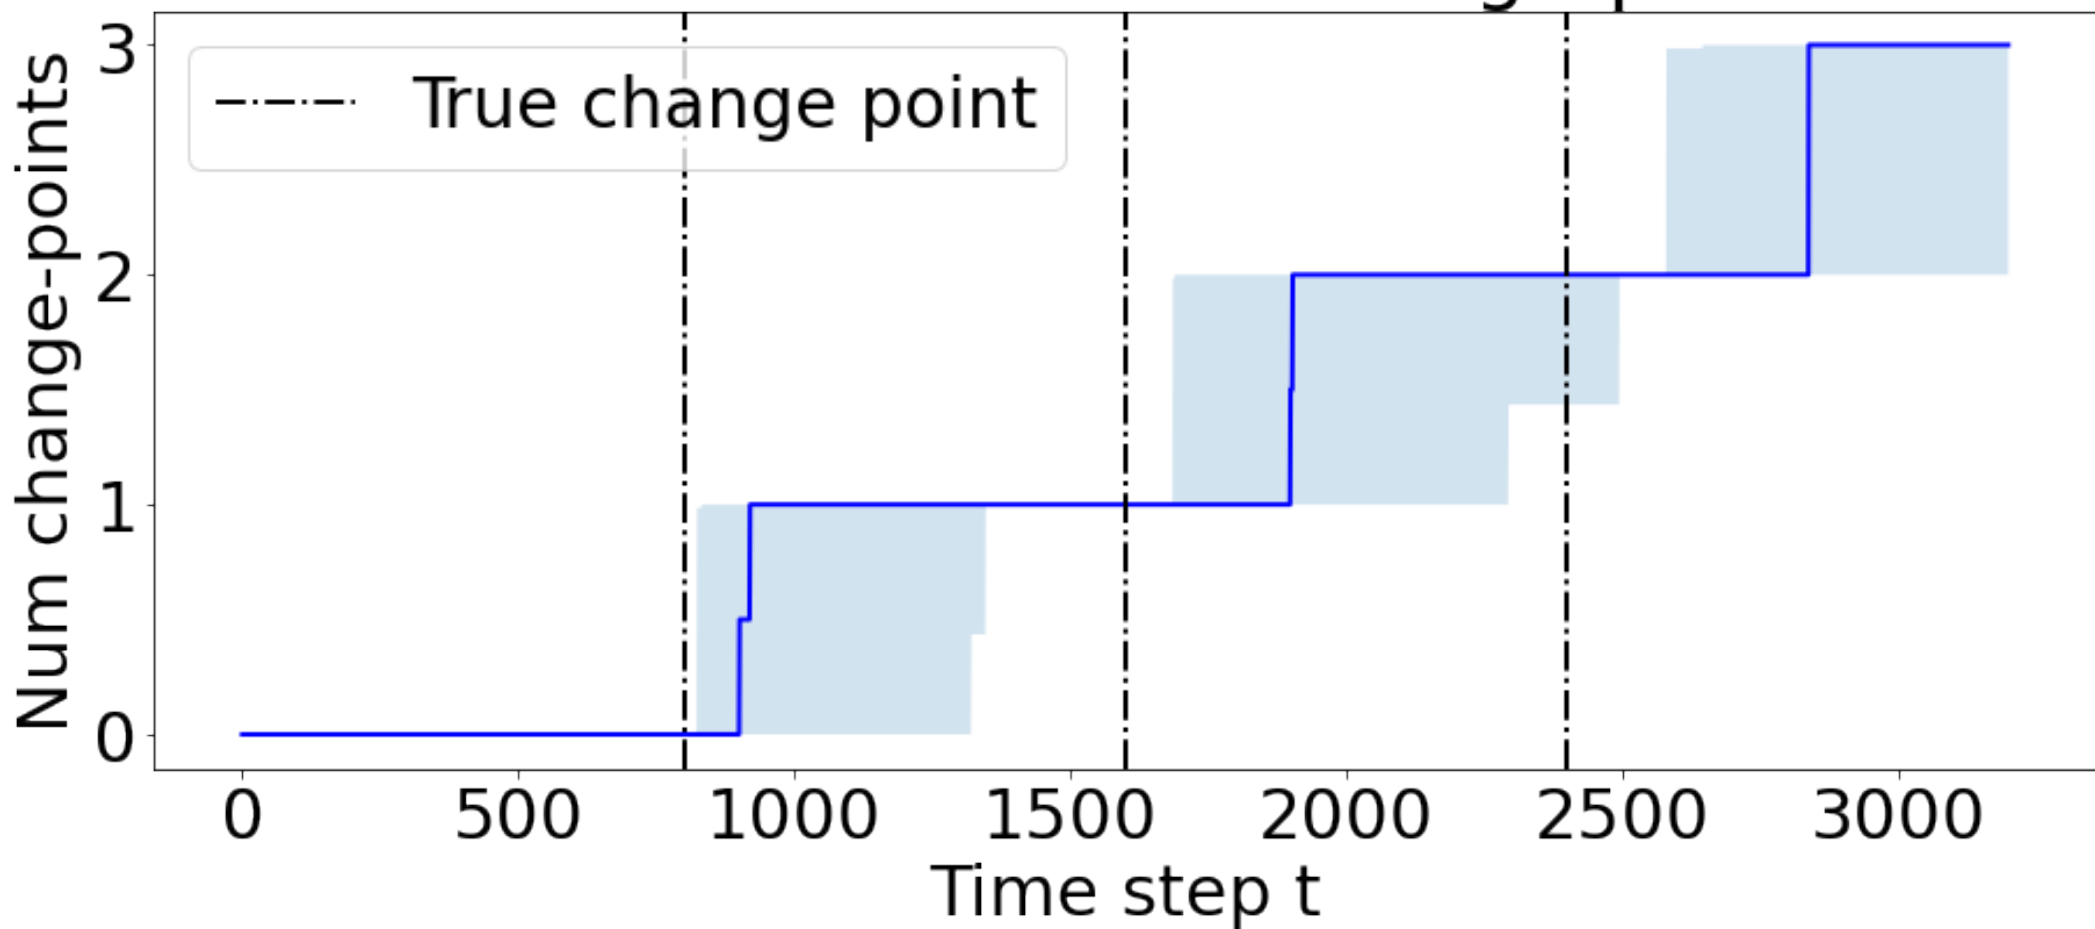

Supplement: supplementary_material [file attachment]

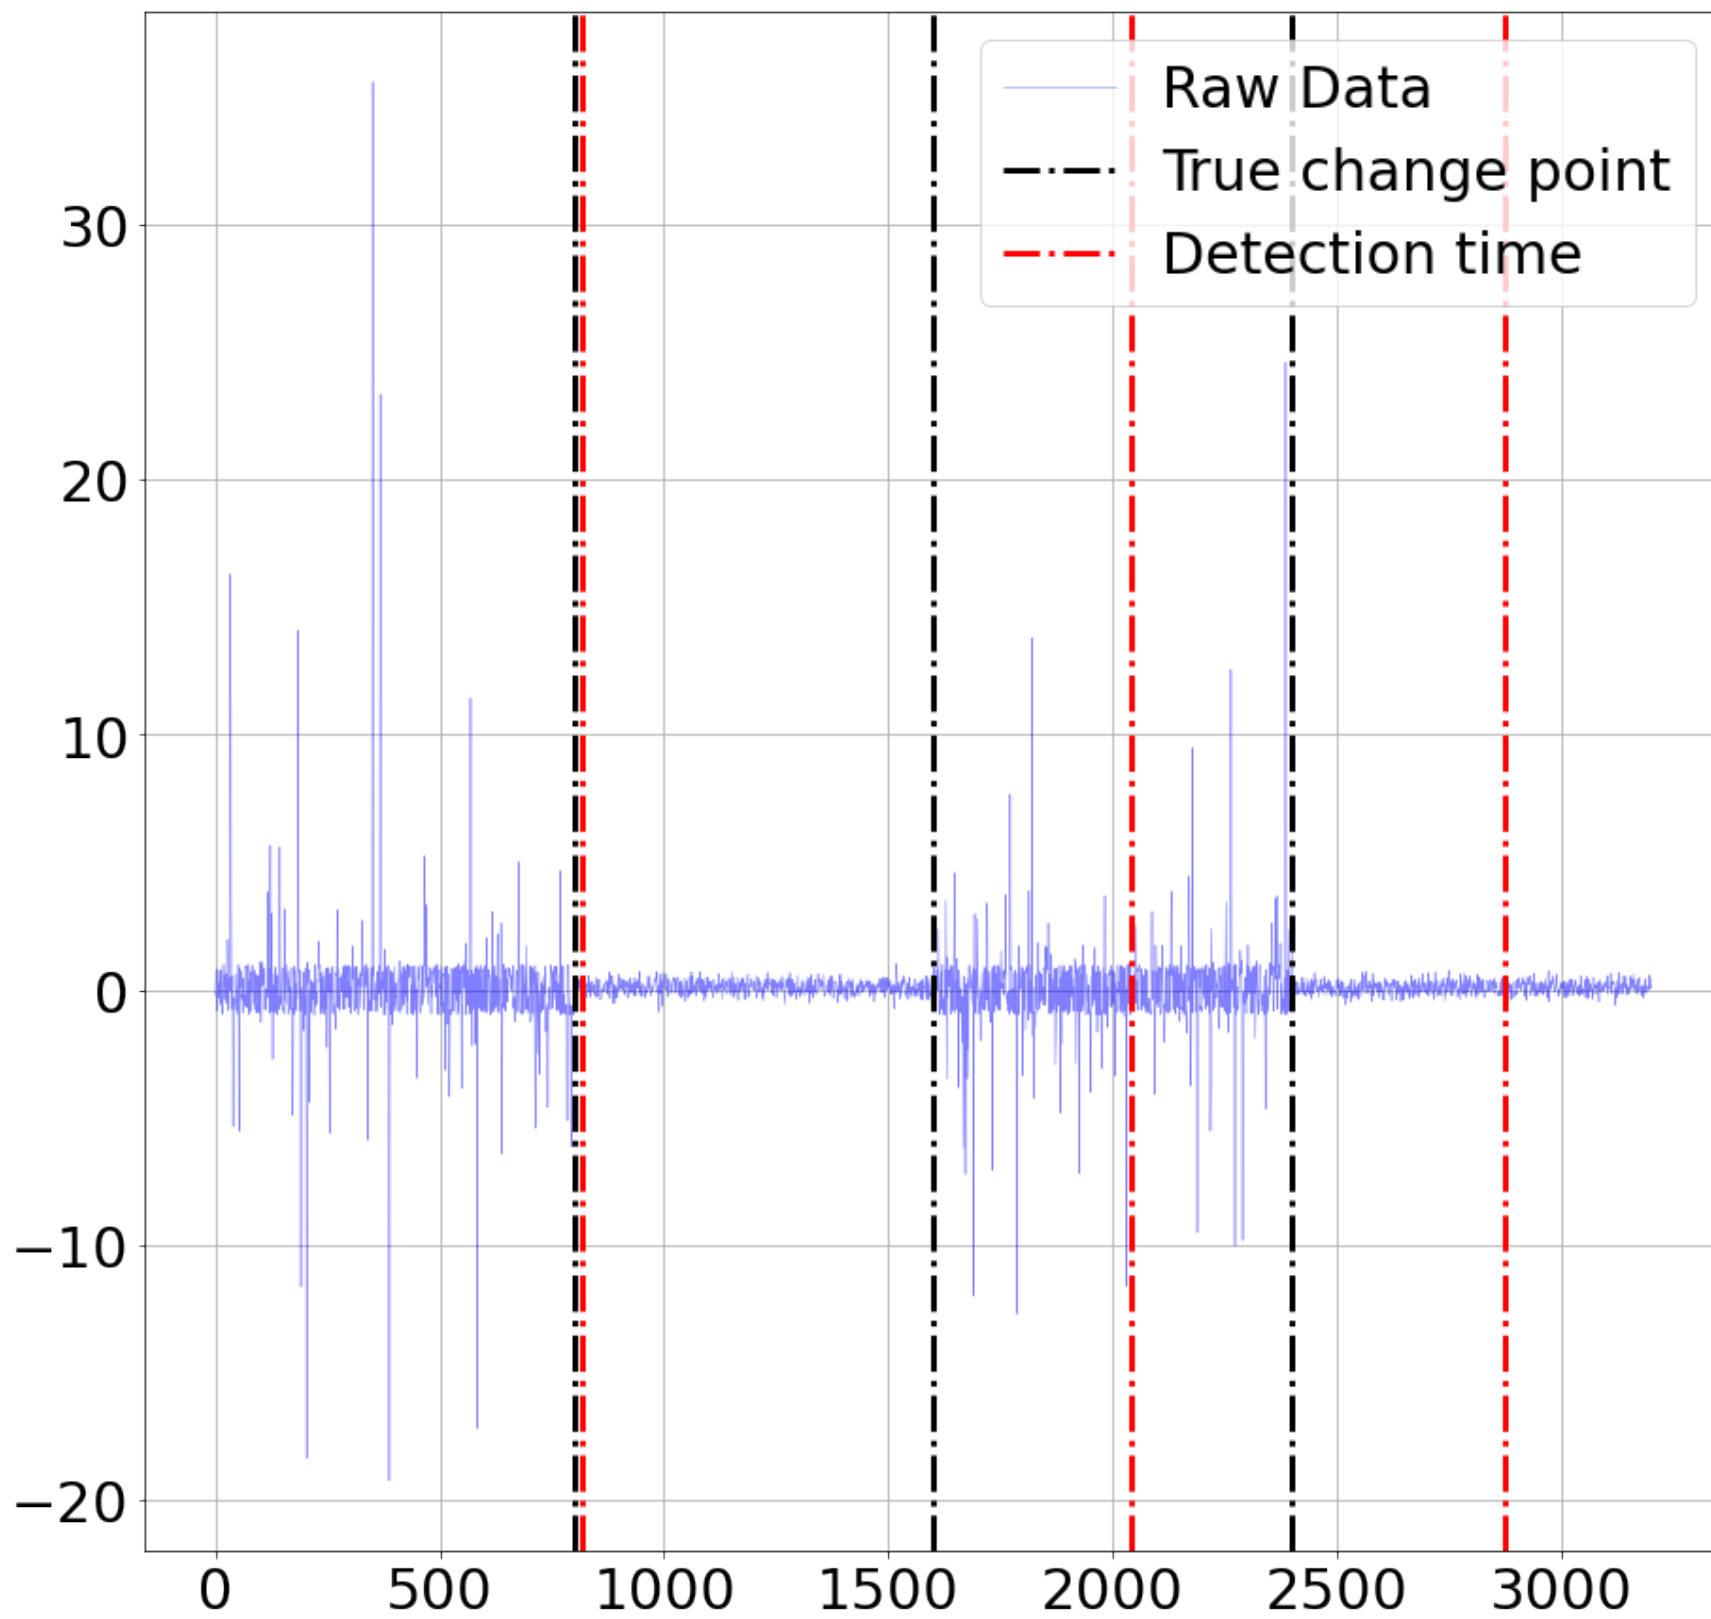

Supplement: supplementary_material [file attachment]

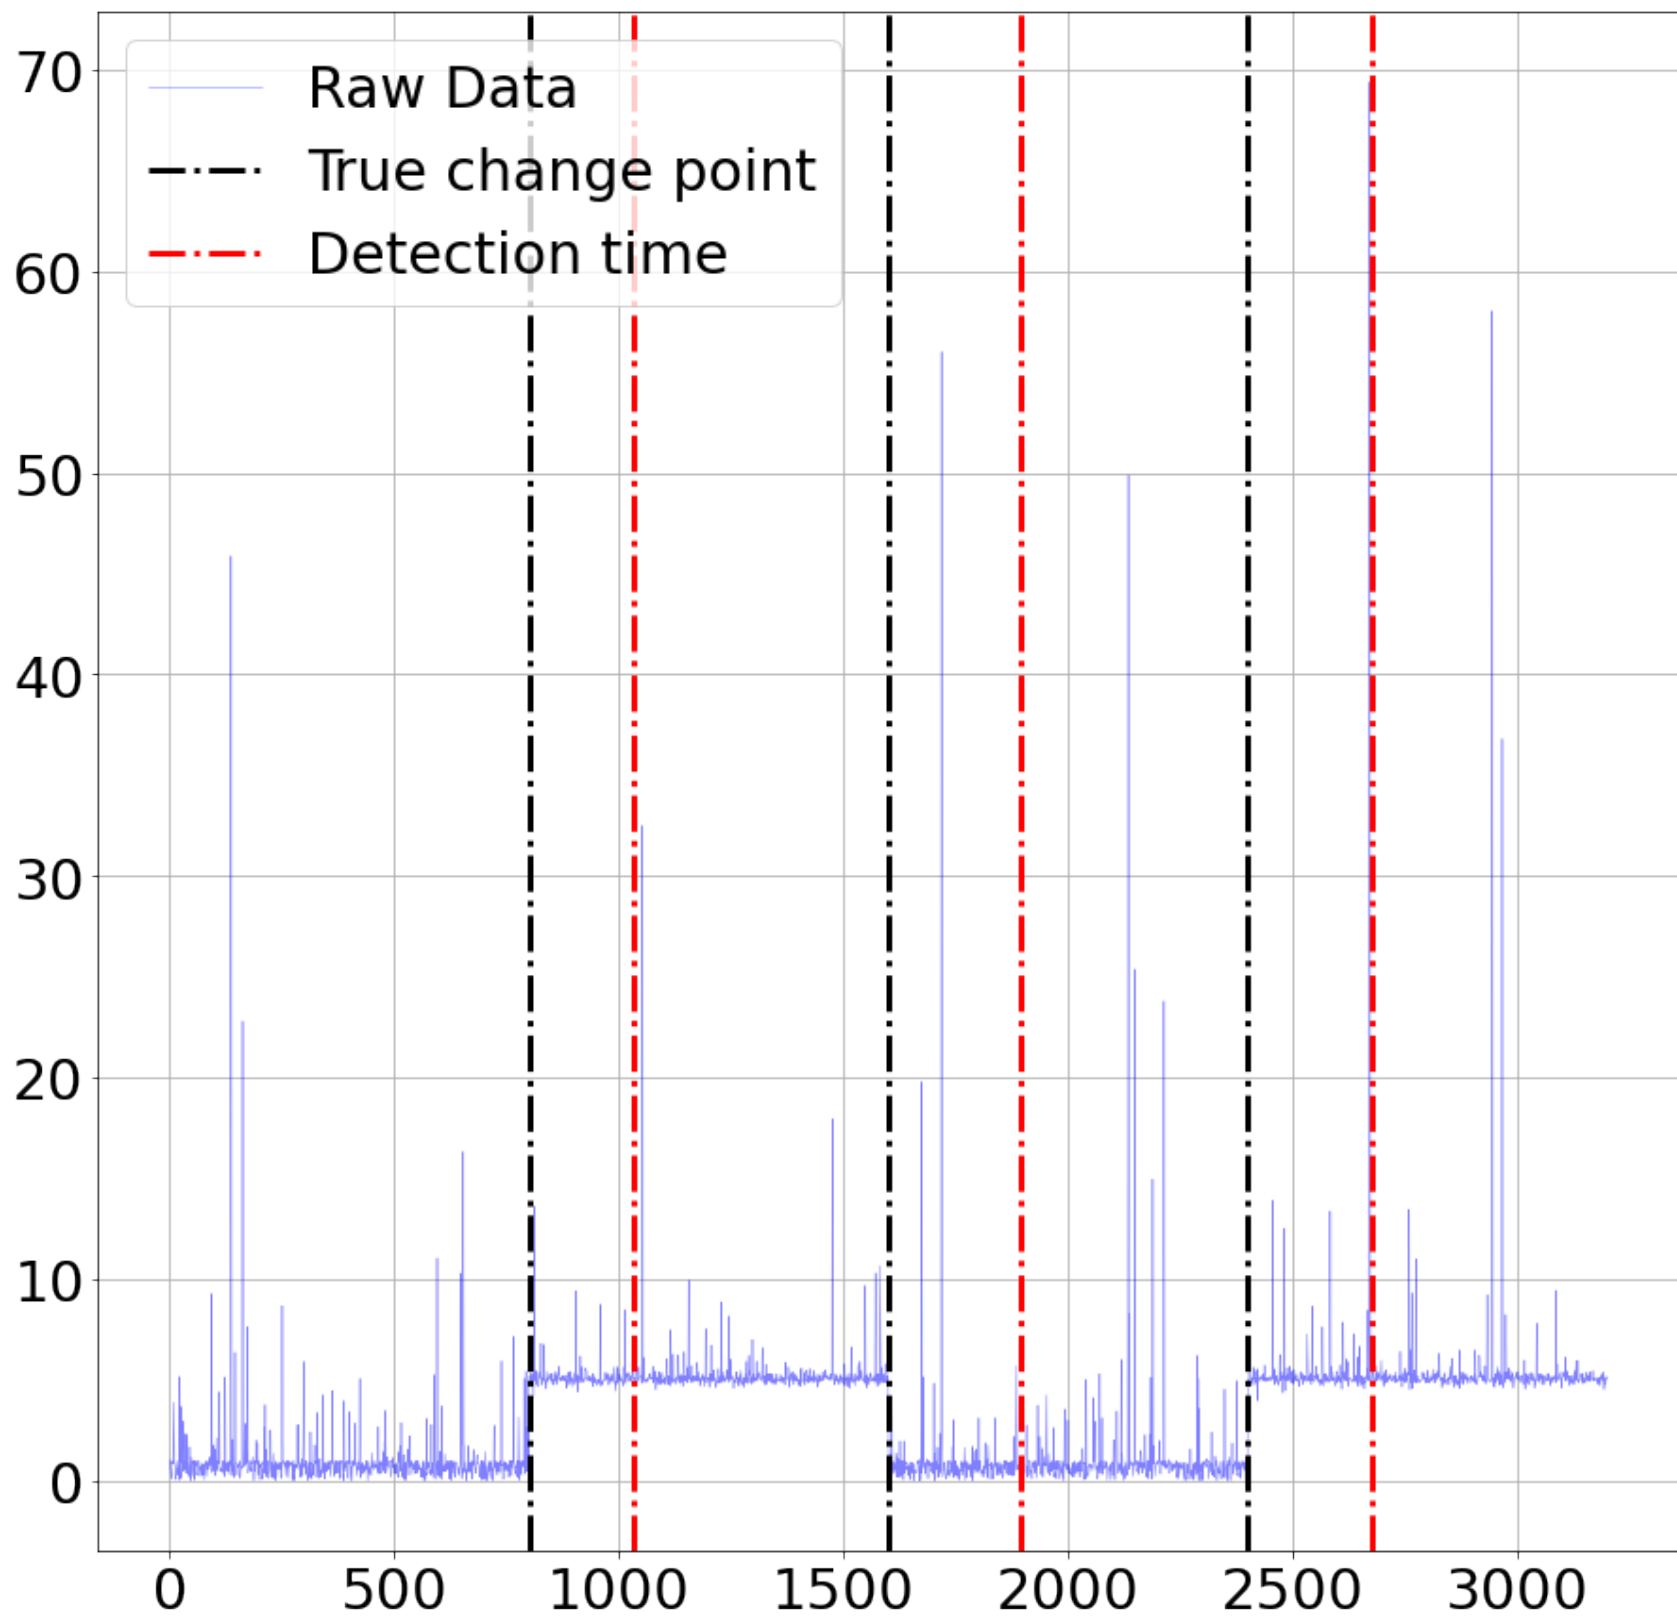

Supplement: supplementary_material [file attachment]

# Location of detected change-points

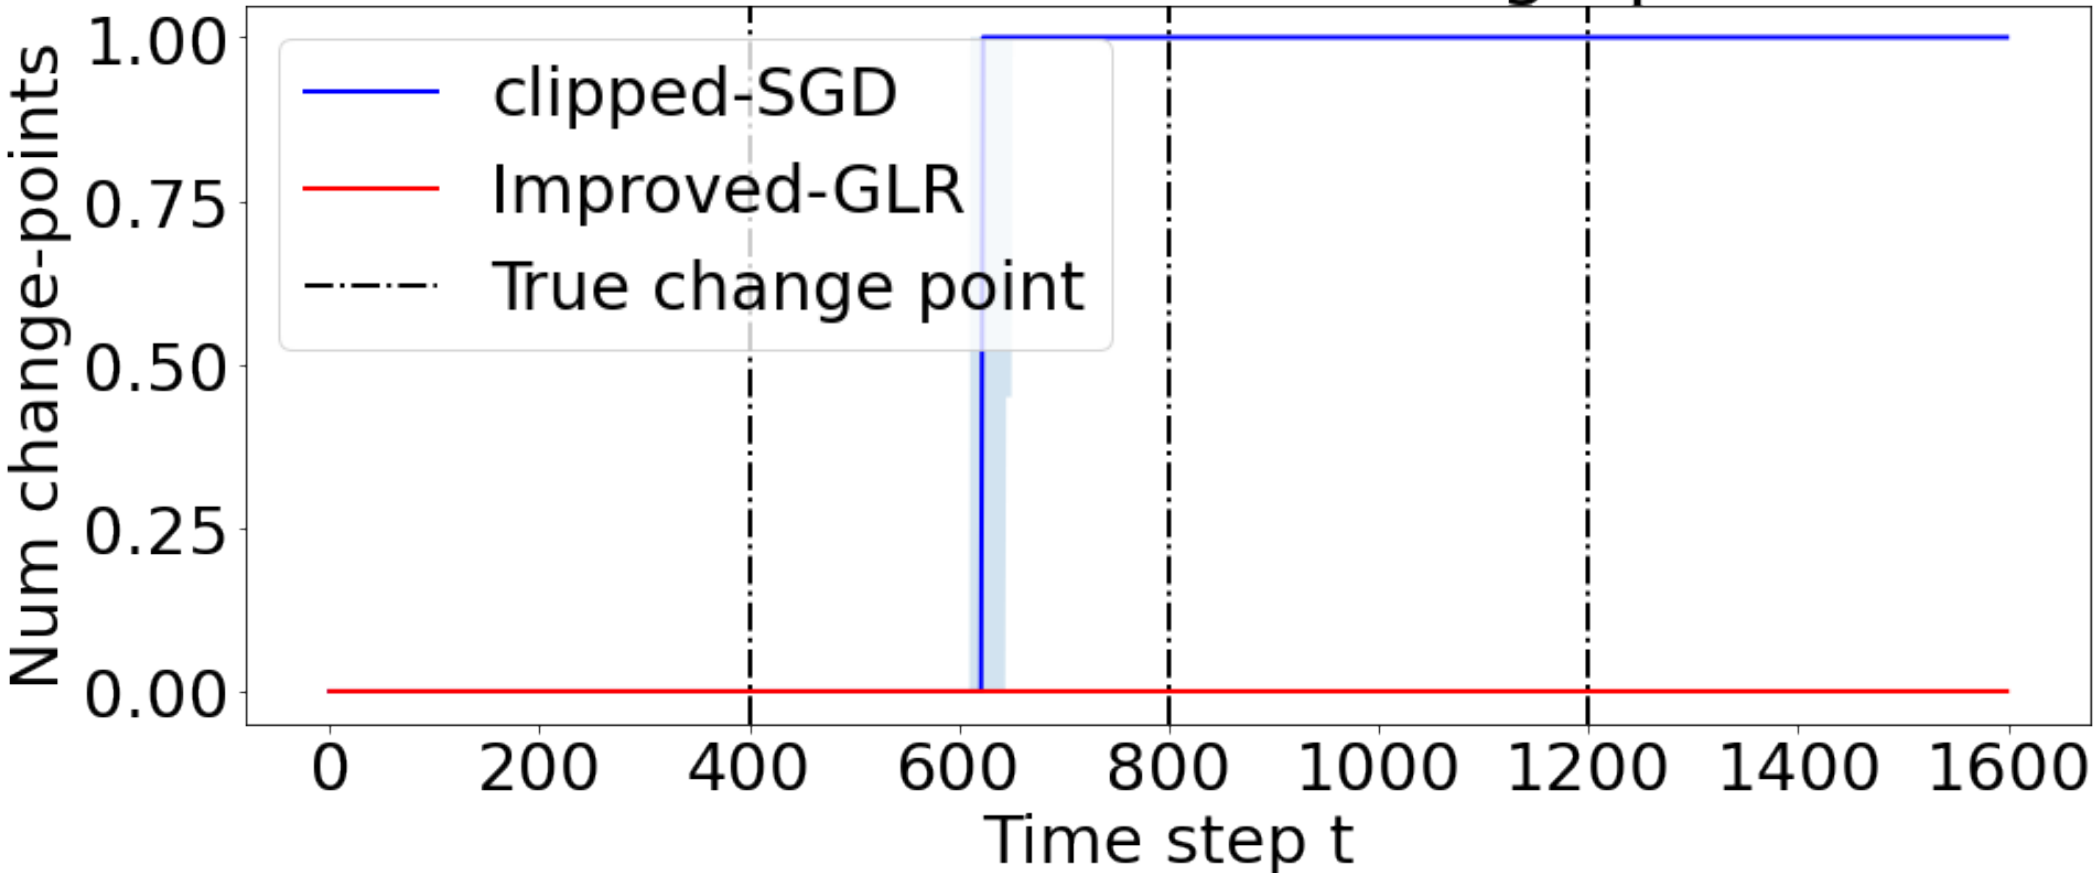

Supplement: supplementary_material [file attachment]

# Location of detected change-points

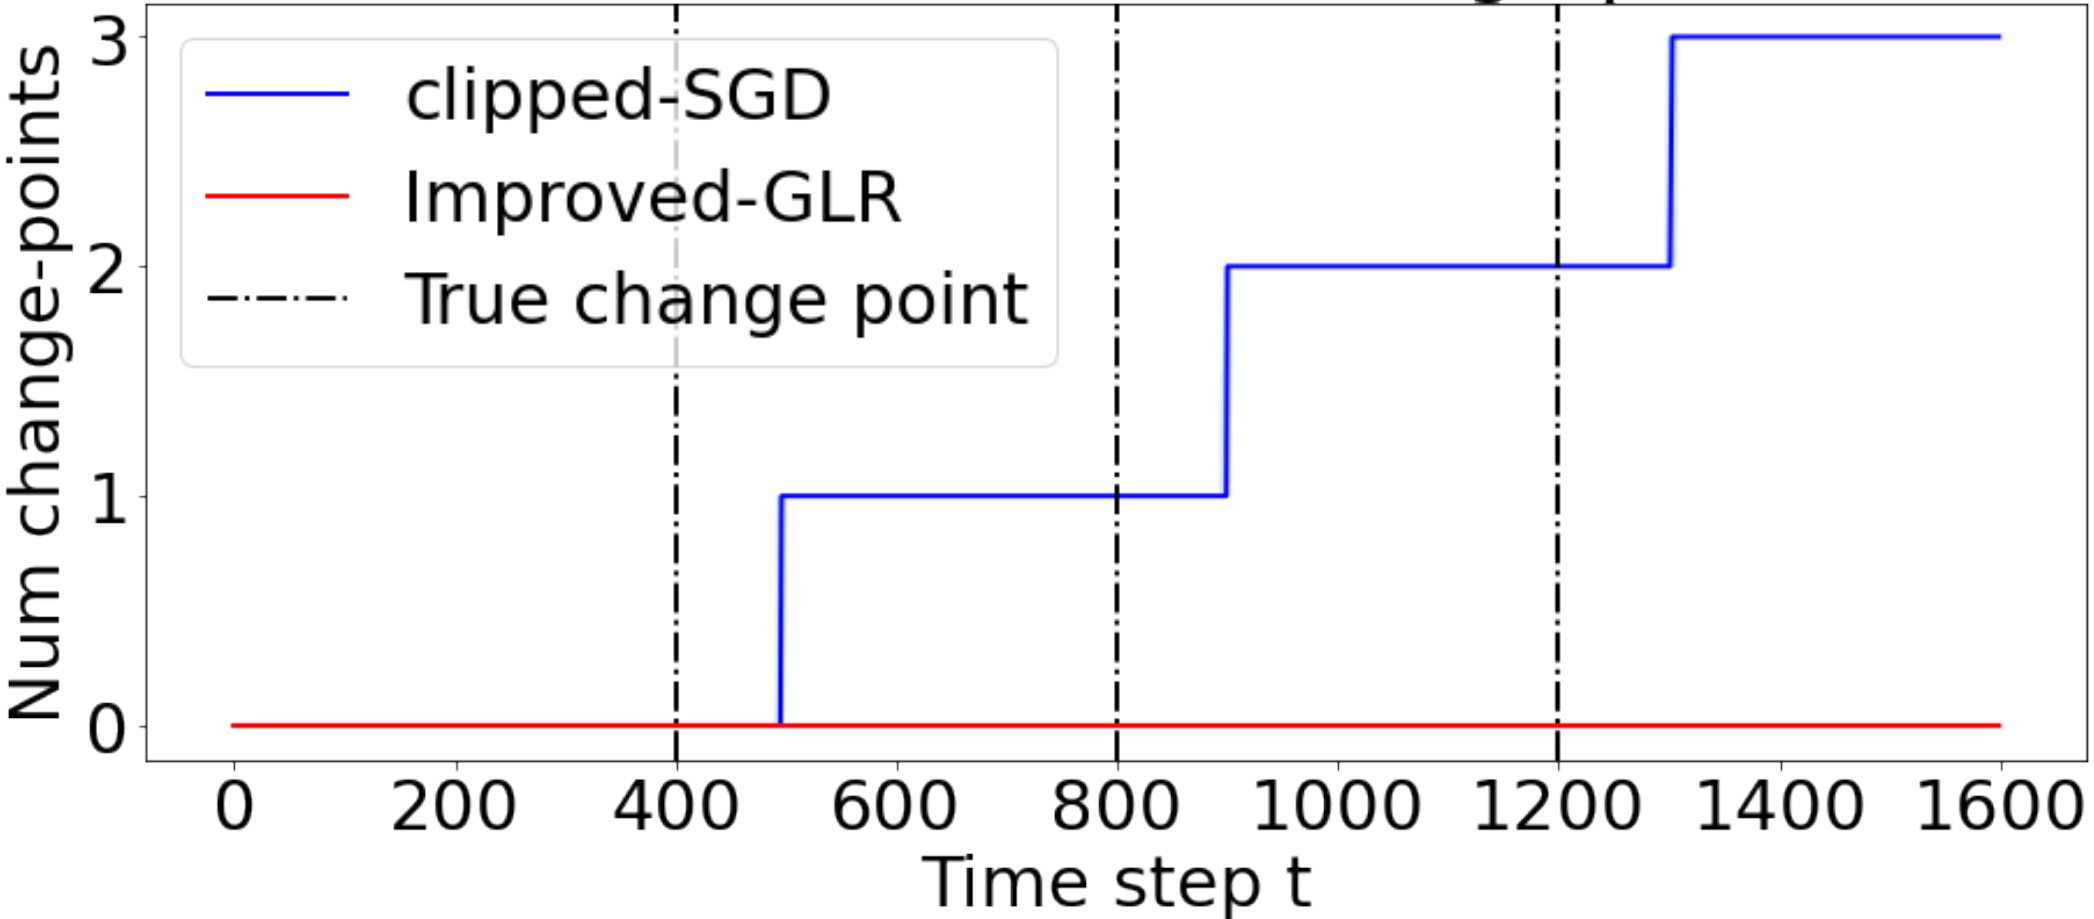

Supplement: supplementary_material [file attachment]

# Location of detected change-points

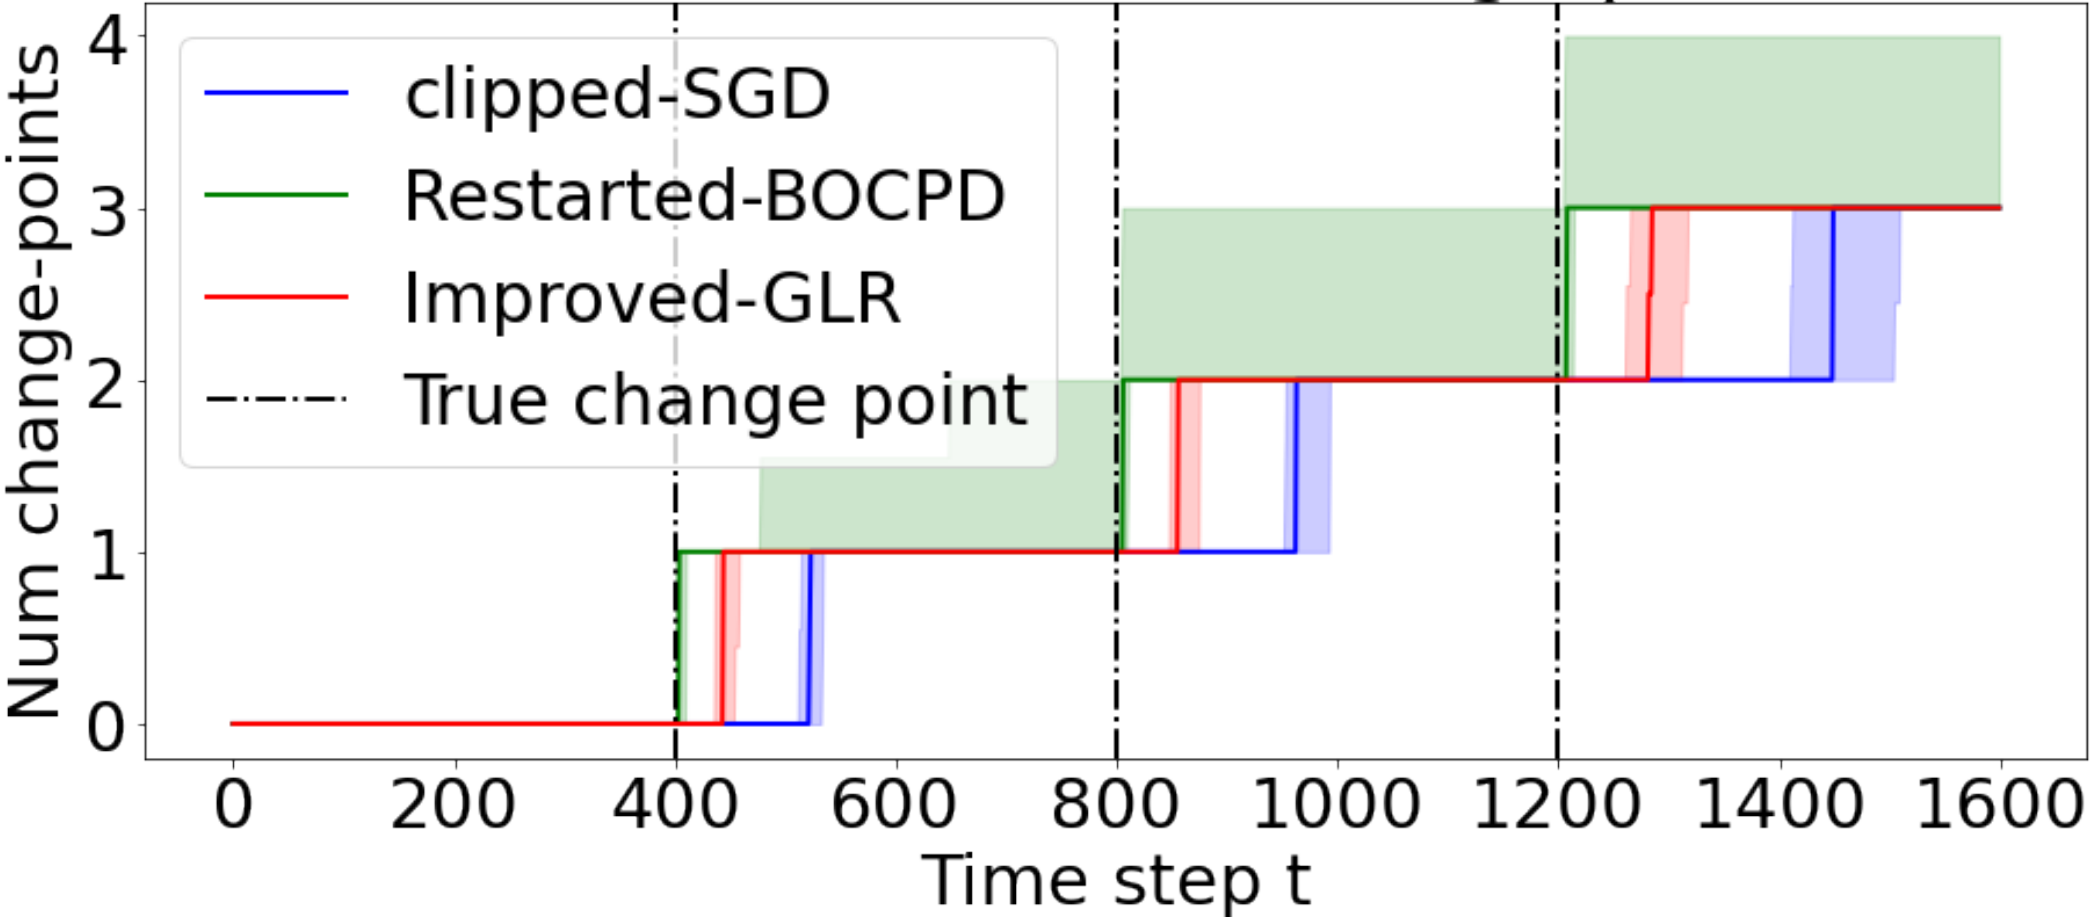

Supplement: supplementary_material [file attachment]

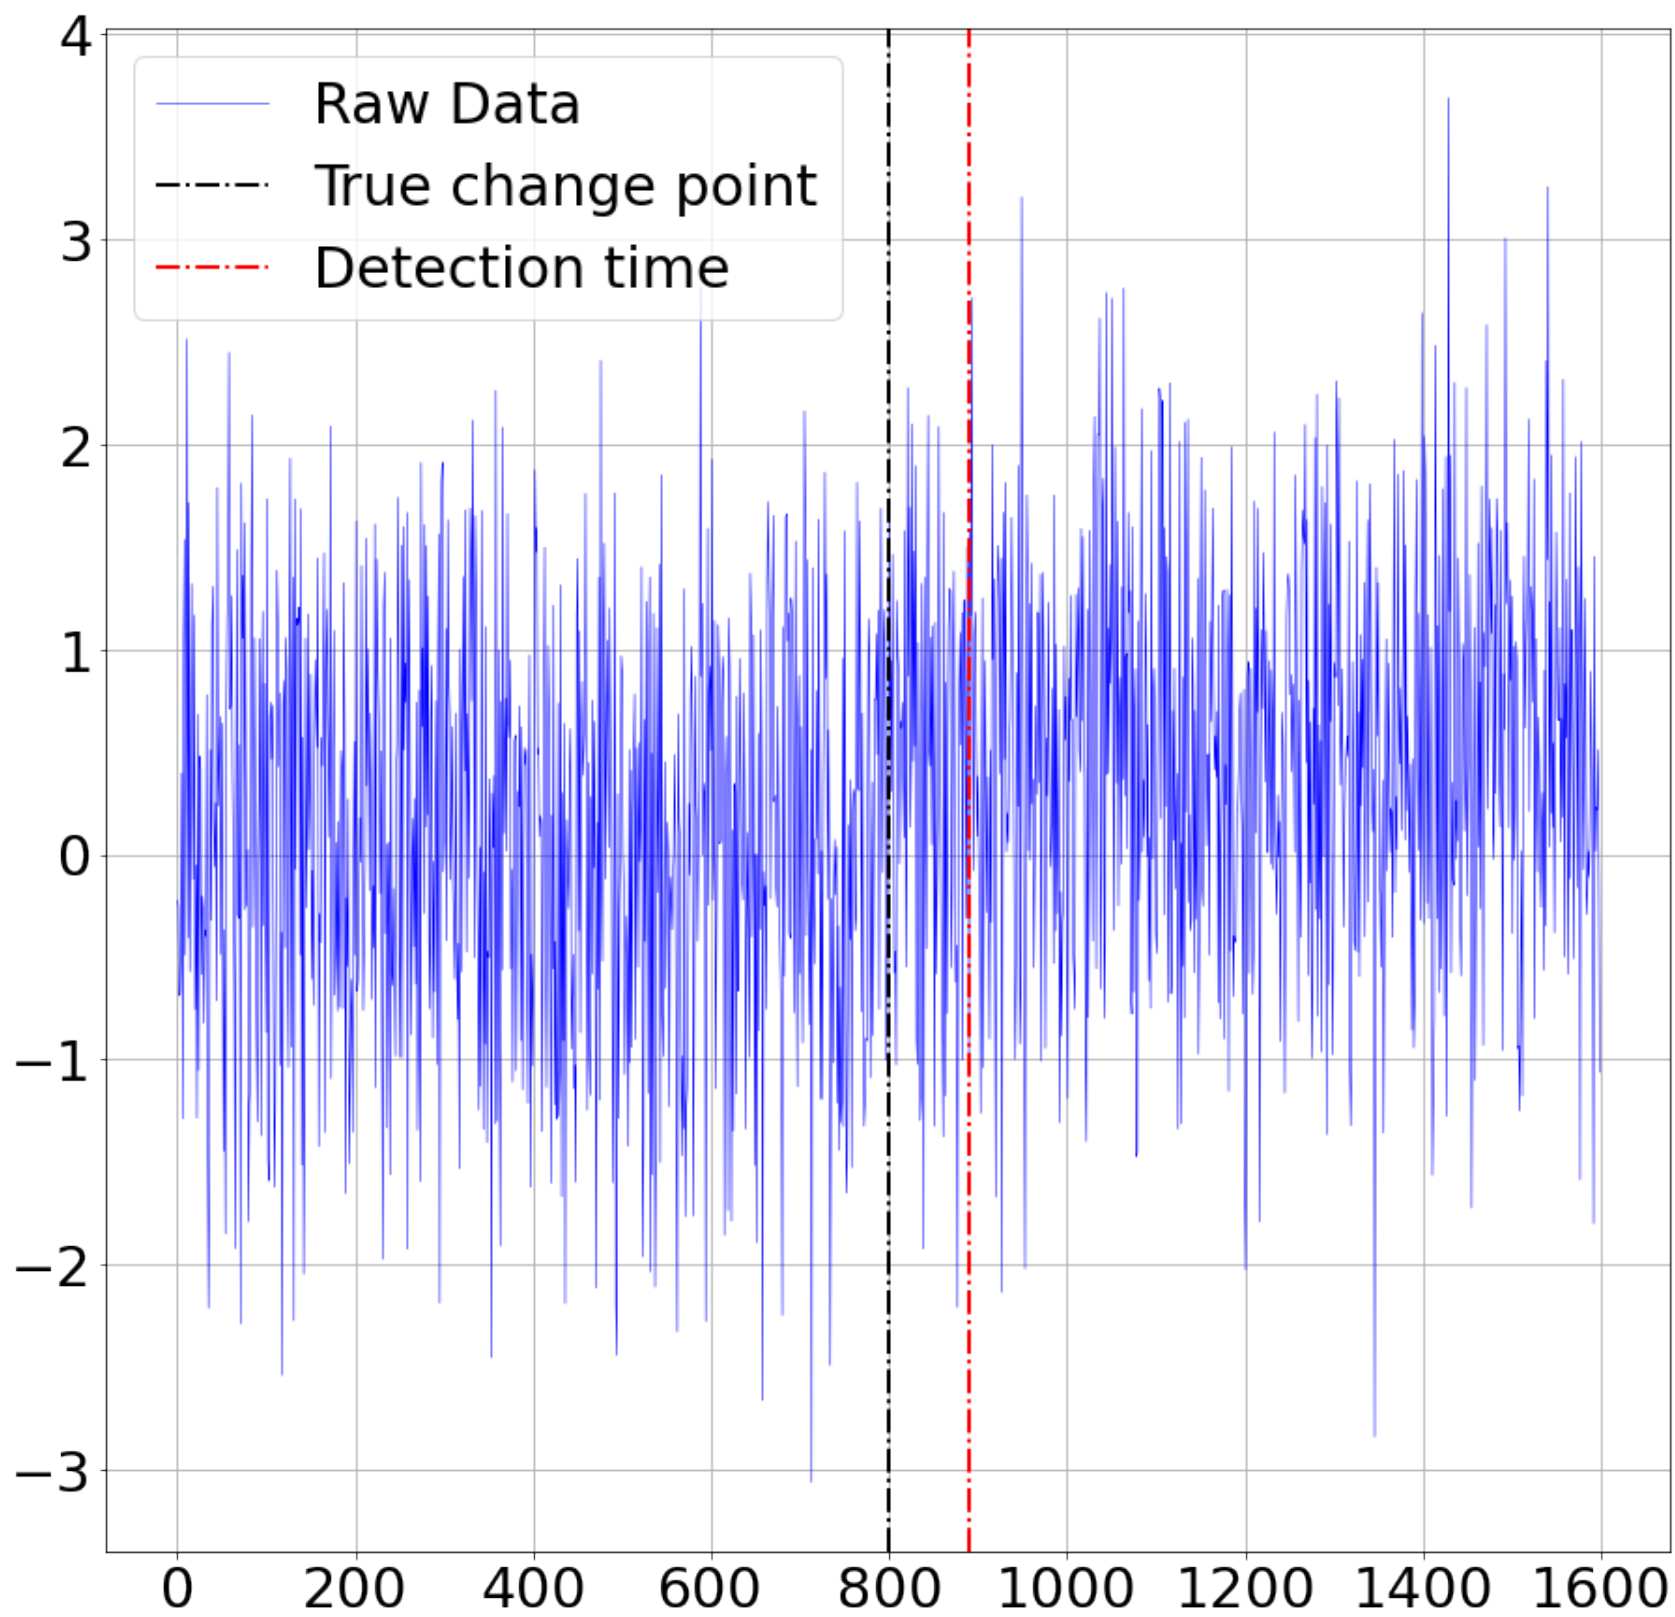

Supplement: supplementary_material [file attachment]

Location of detected change-points

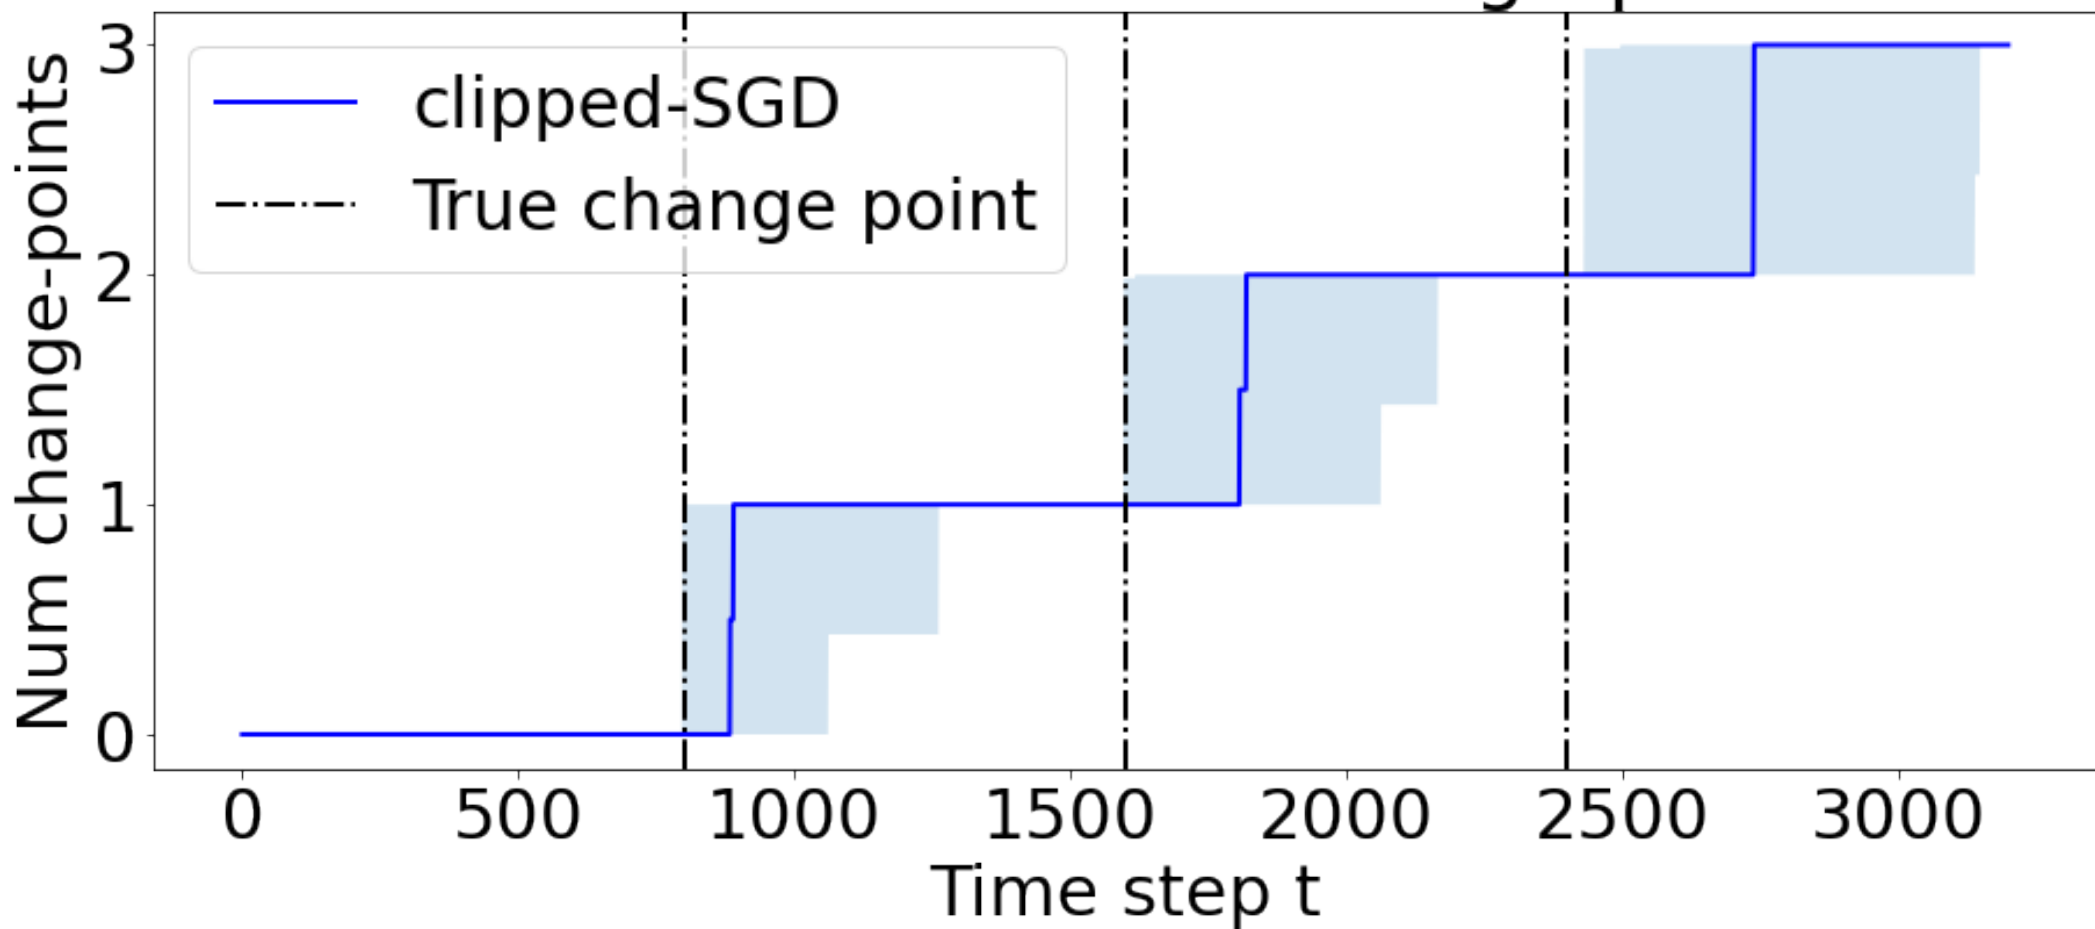

Supplement: supplementary_material [file attachment]

# Location of detected change-points

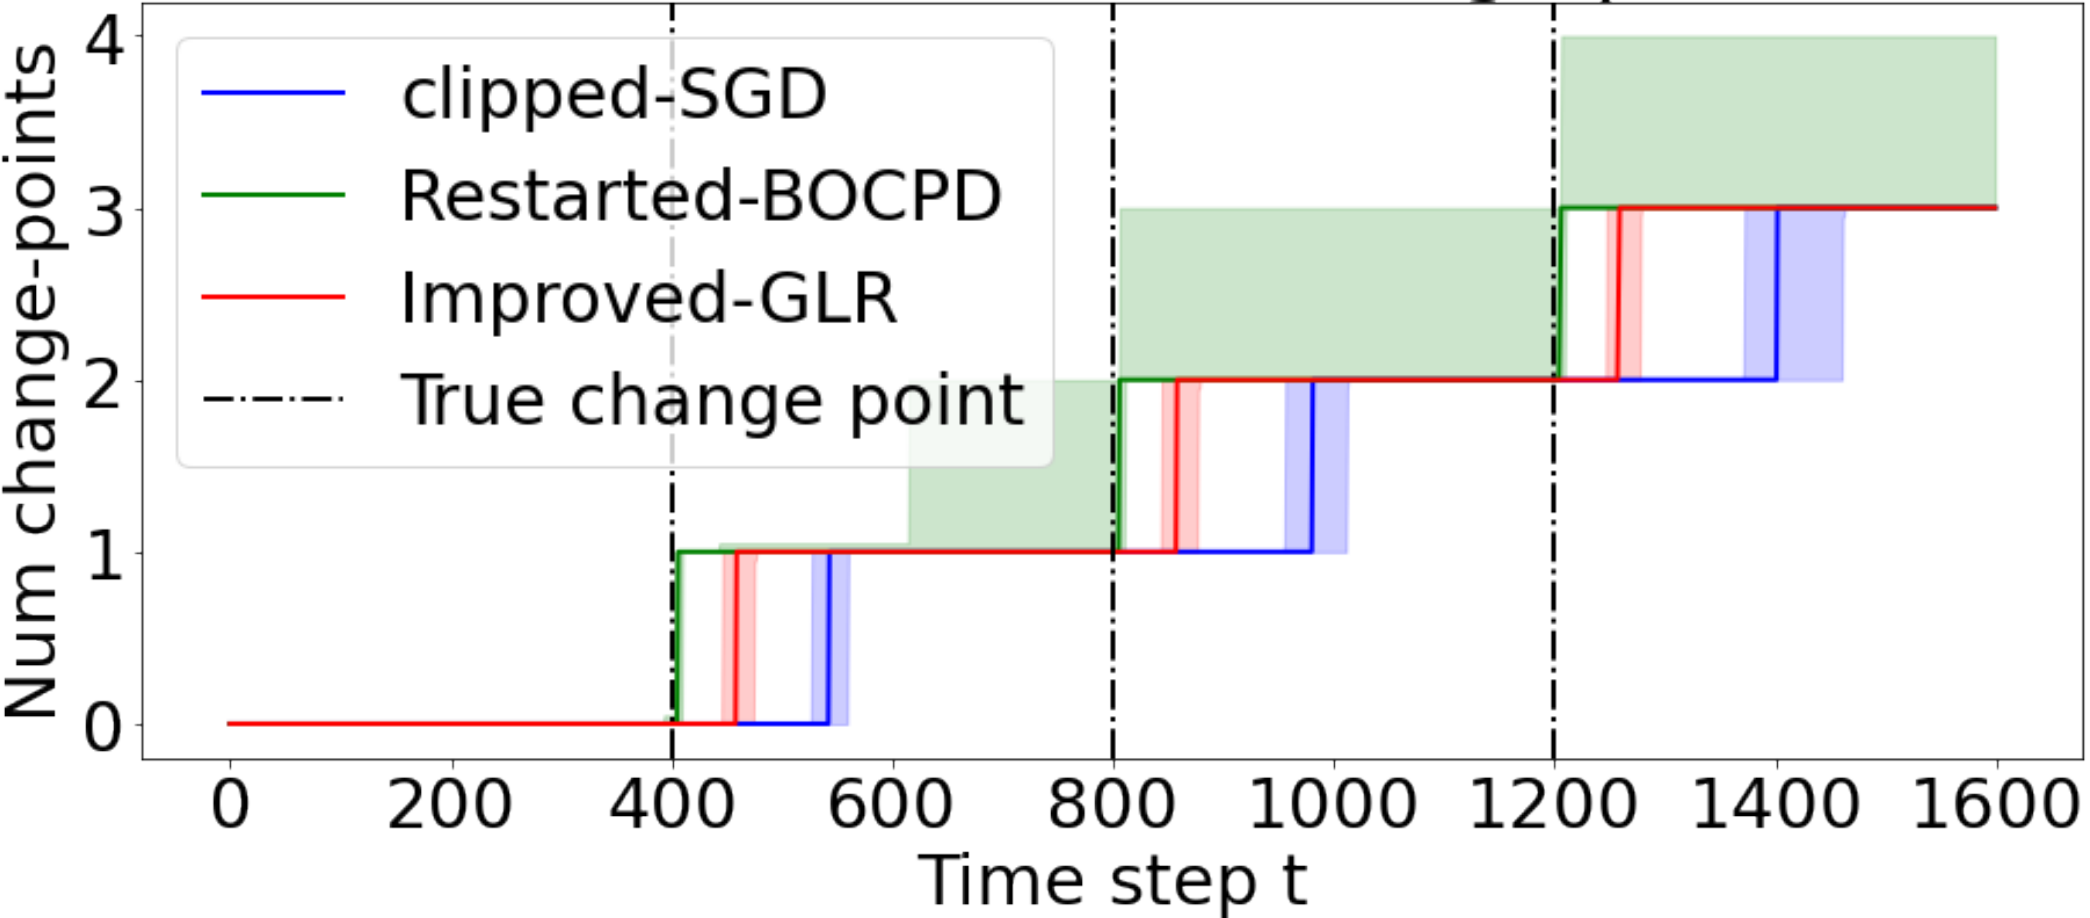

Supplement: supplementary_material [file attachment]

# Location of detected change-points

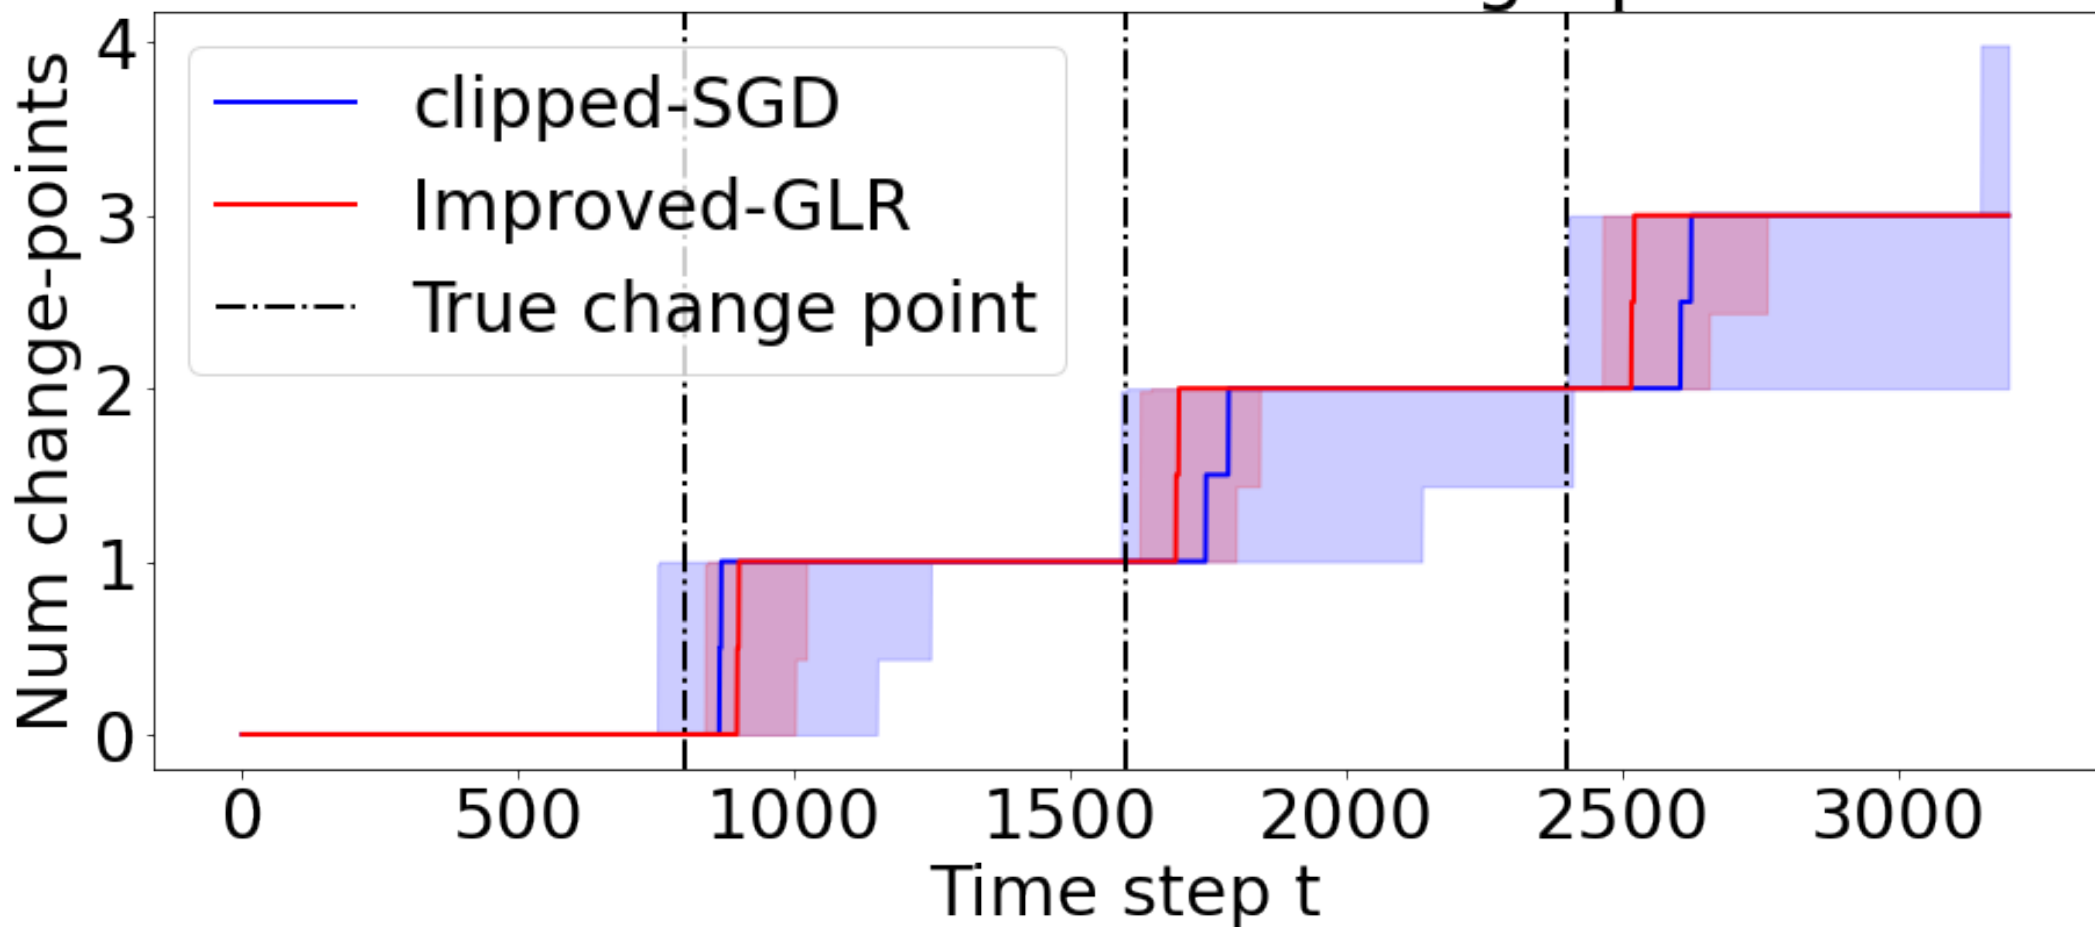

Supplement: supplementary_material [file attachment]

Location of detected change-points

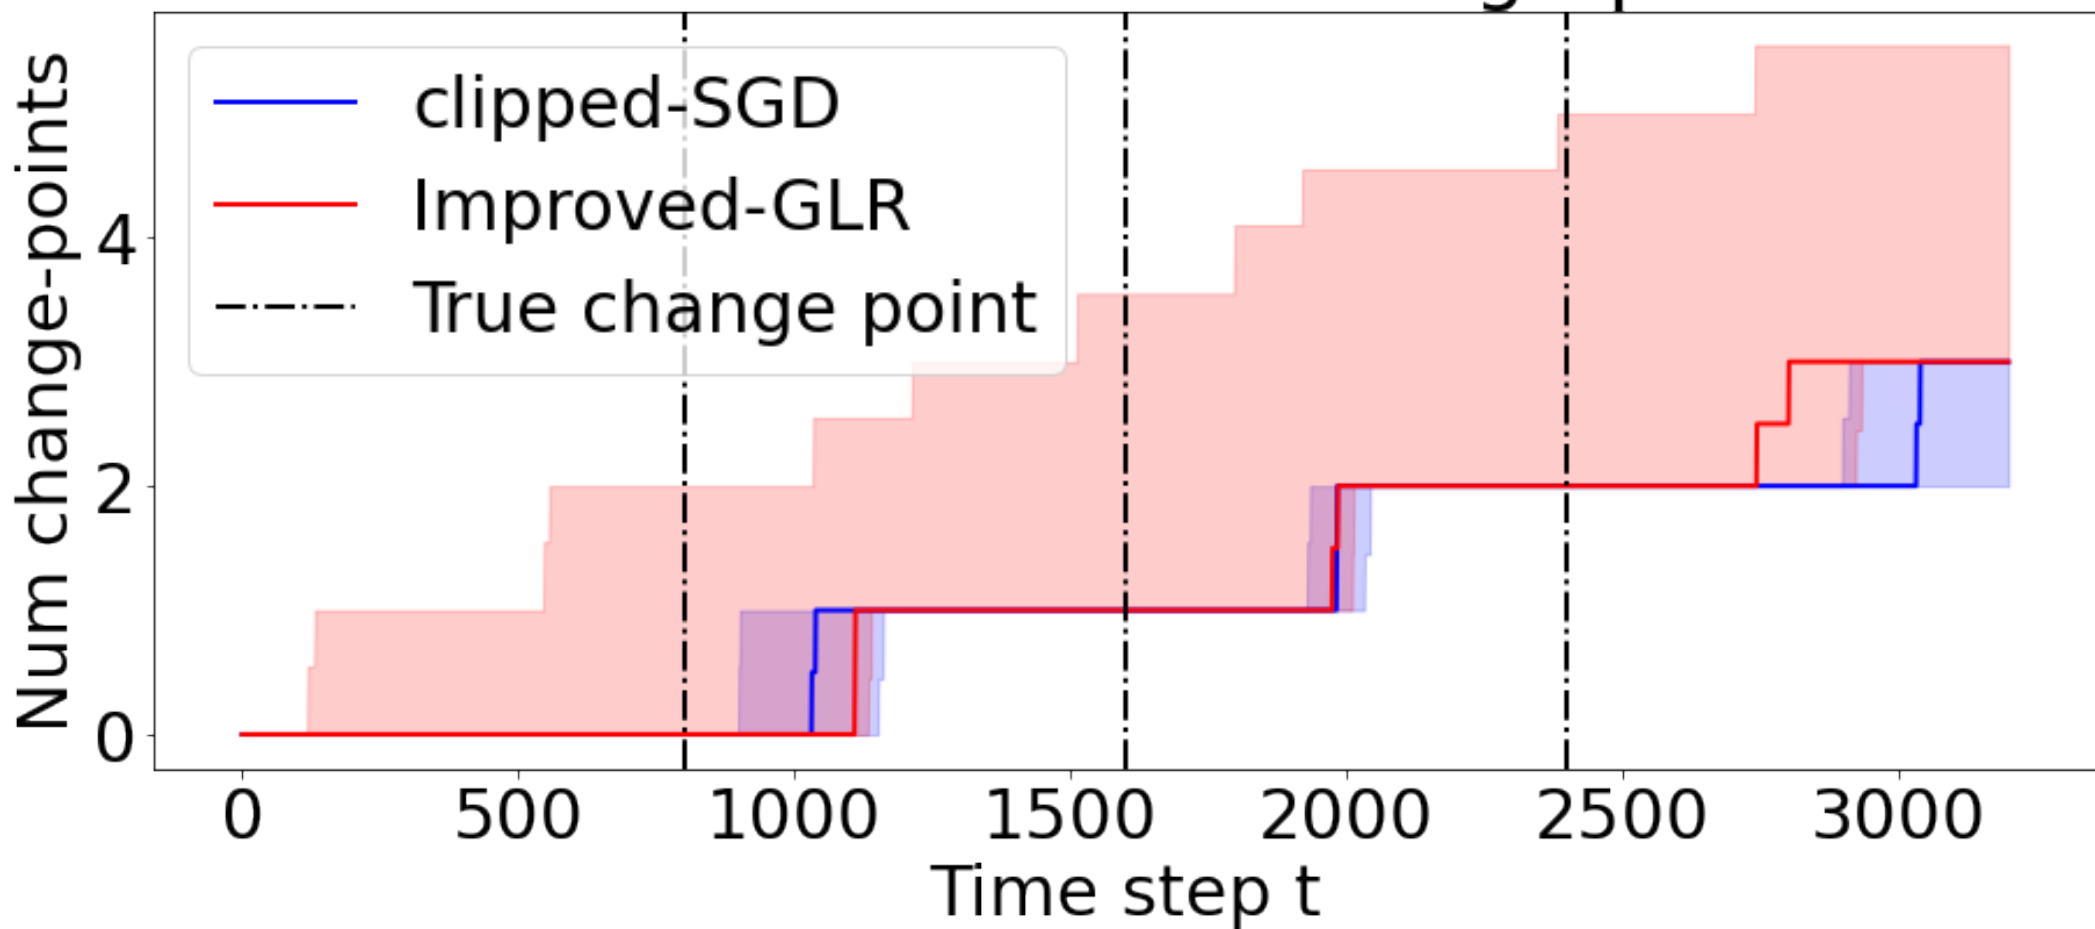

Supplement: supplementary_material [file attachment]

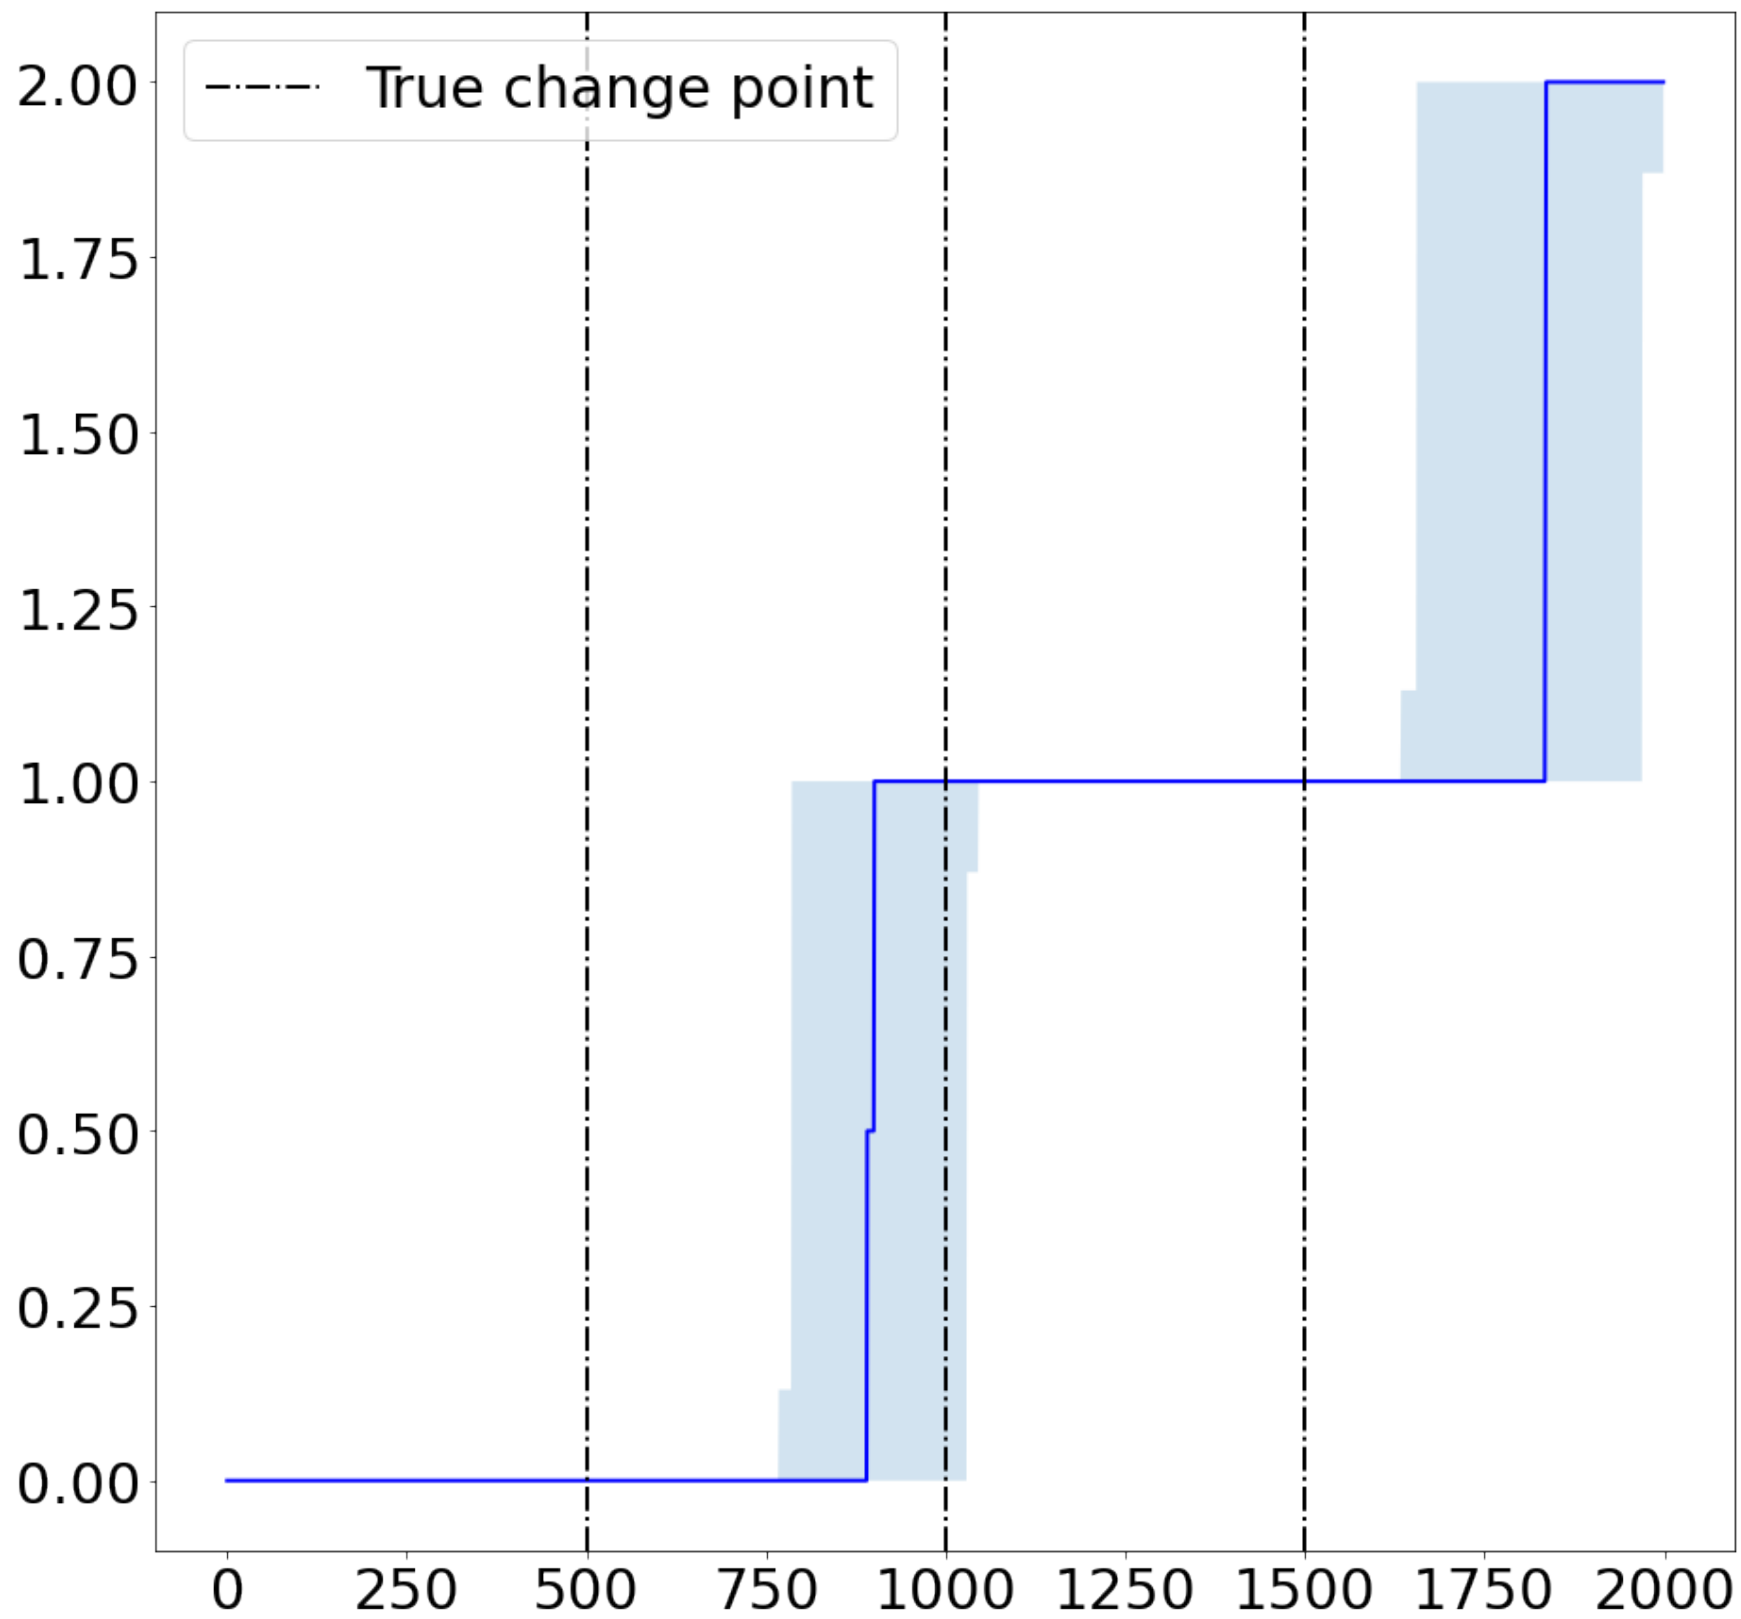

Supplement: supplementary_material [file attachment]

Location of detected change-points

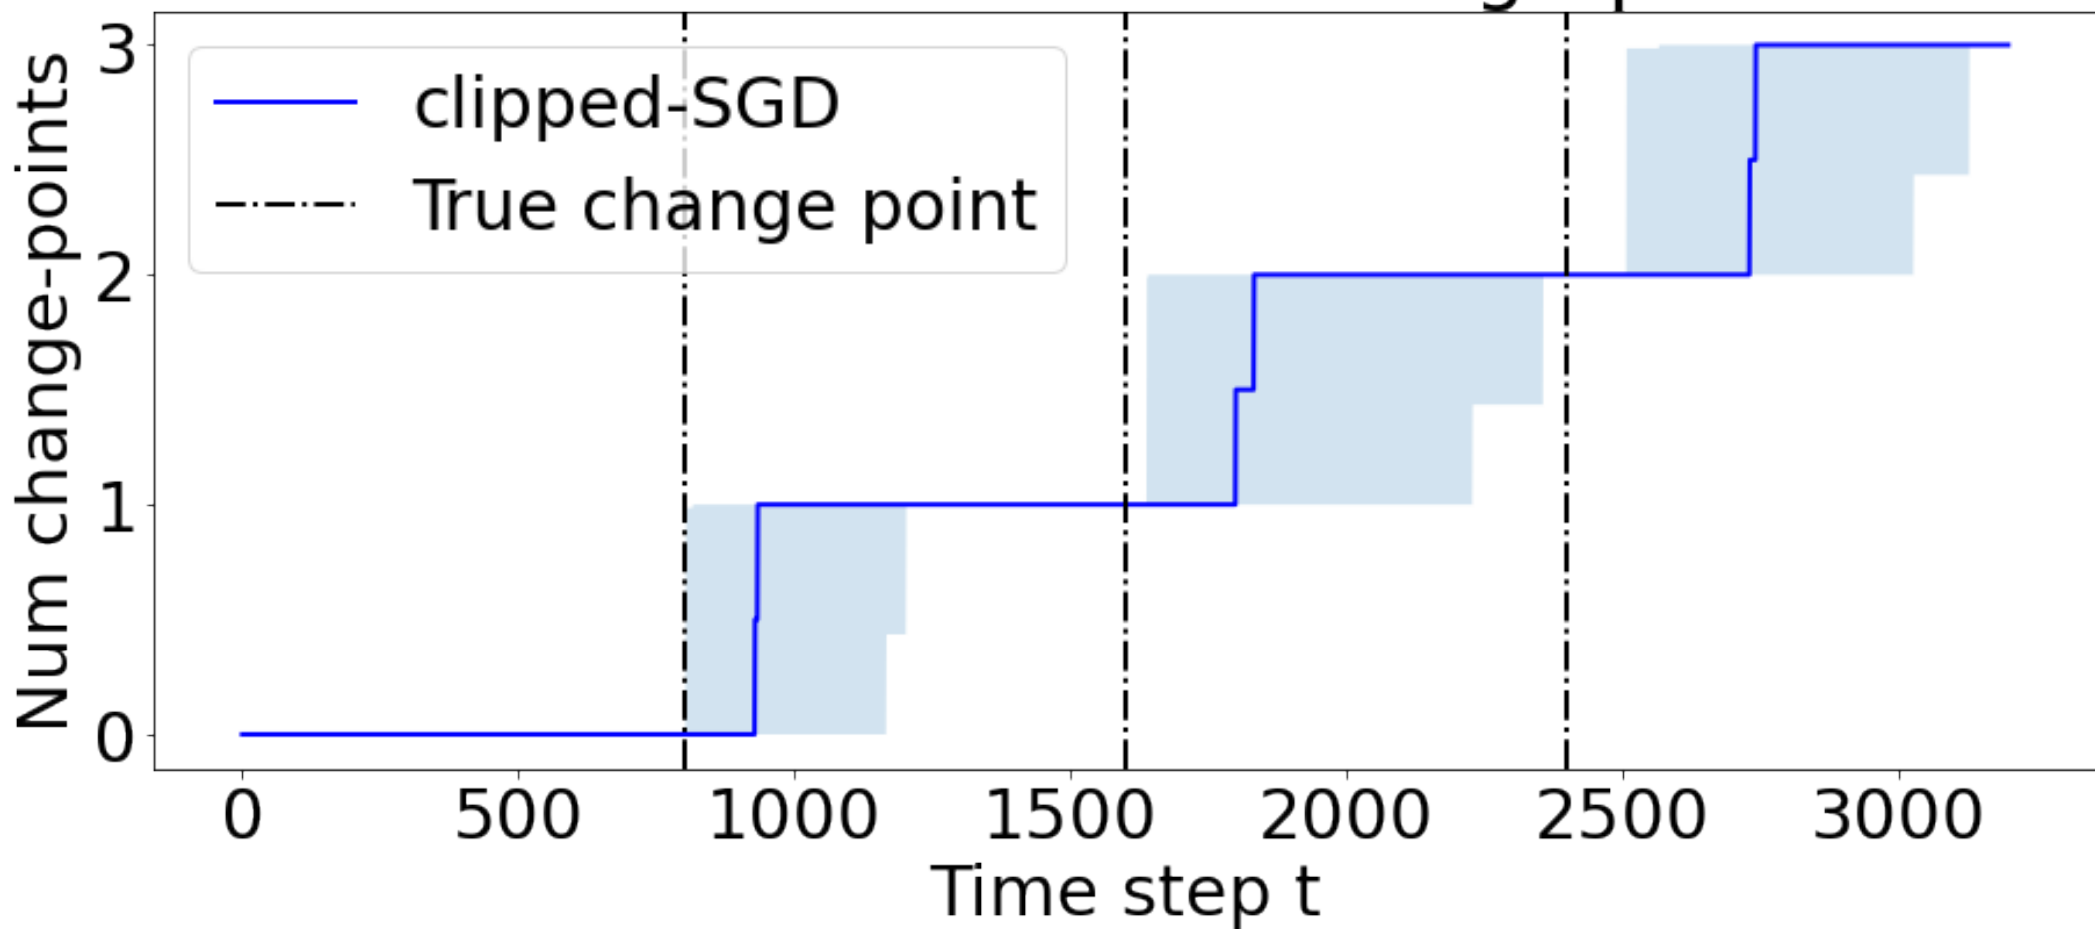

Supplement: supplementary_material [file attachment]

# Change-magnitude $\Delta = 10$

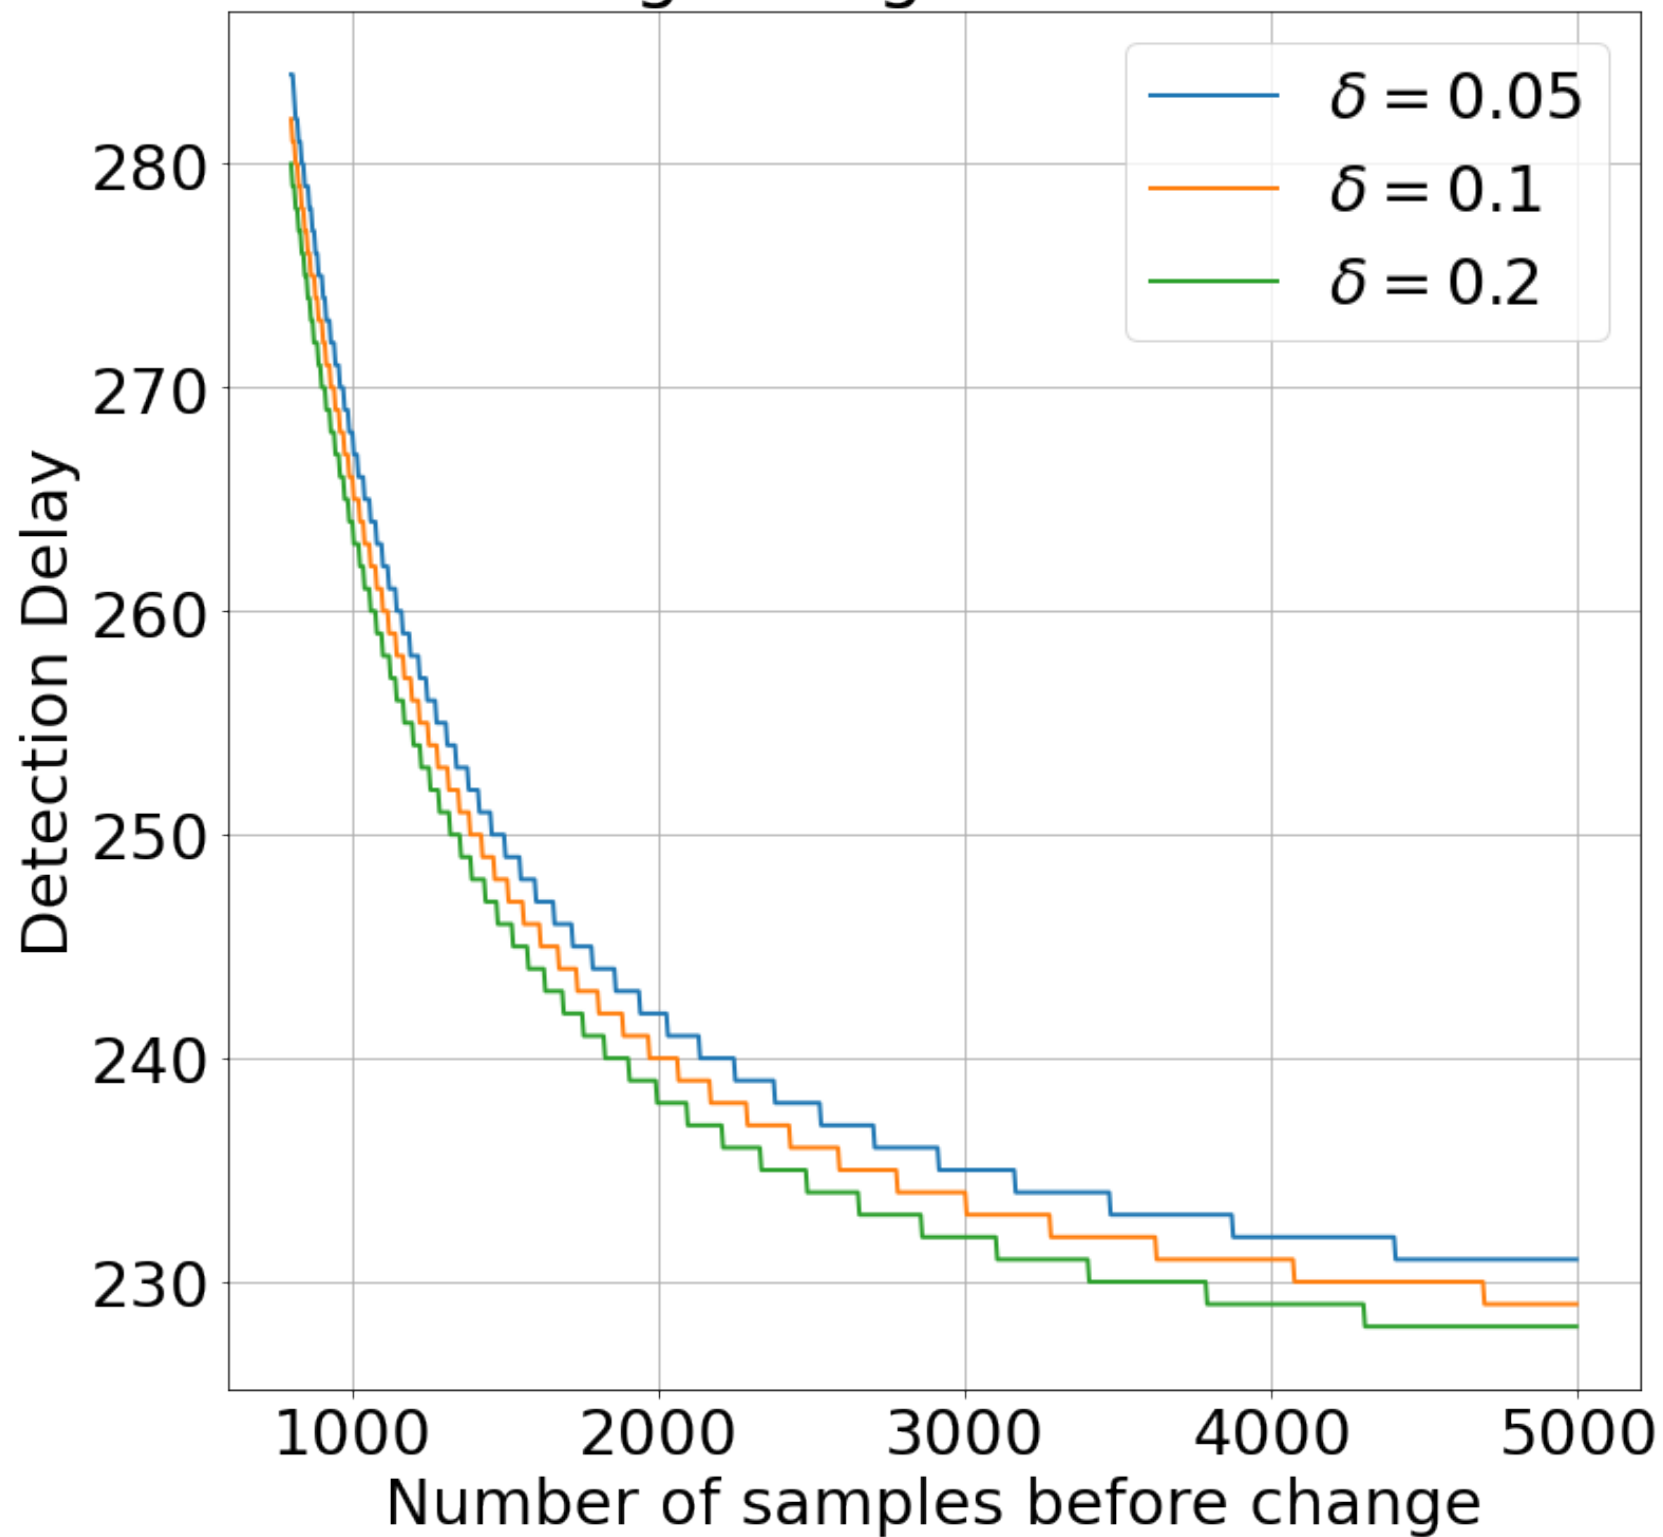

Supplement: supplementary_material [file attachment]
